# Supplementary material for: Acid ceramidase of macrophages traps herpes simplex virus in multivesicular bodies and protects from severe disease
Source: PubMed Central journal article supplement (PMC7067866; doi:10.1038/s41467-020-15072-8), 2020-03-12
Supplement: 41467_2020_15072_MOESM1_ESM.pdf [file 41467_2020_15072_MOESM1_ESM.pdf]

# **Acid ceramidase of macrophages traps herpes simplex virus in multivesicular bodies and protects from severe disease**

Lang et al.

Supplementary Information

# Chemical synthesis of $\omega$ -azido-sphingosine

## General Experimental Information

Commercially available chemical reagents, purchased from *Sigma-Aldrich*, *Alfa Aesar*, *TCI* and *ACROS*, were used as received without further purification. All solvents were distilled before usage and moisture-sensitive reactions were performed under nitrogen atmosphere. Analytical thin-layer chromatography (TLC) was performed using silica gel coated aluminum plates with a thickness of 0.2 mm (*Macherey-Nagel*). The compounds were visualized with a potassium permanganate stain solution containing 1.50 g  $\text{KMnO}_4$ , 10.0 g  $\text{K}_2\text{CO}_3$  and 100 mg NaOH in 200 mL  $\text{H}_2\text{O}$ . Liquid column chromatography purification was performed with silica gel 60 (40–63  $\mu\text{m}$  mesh, *Macherey-Nagel*).

Nuclear magnetic resonance (NMR) spectra were recorded on a *Bruker* Avance III HD 400 at 295 K. Chemical shifts ( $\delta$ ) are given in parts per million (ppm) with respect to the solvent residual proton signals ( $\delta(\text{CDCl}_3) = 7.26$  ppm,  $\delta(\text{CD}_3\text{OD}) = 3.31$  ppm) for  $^1\text{H}$  or the resonance signals ( $\delta(\text{CDCl}_3) = 77.16$  ppm,  $\delta(\text{CD}_3\text{OD}) = 49.00$  ppm) for  $^{13}\text{C}$ . Coupling constants ( $J$ ) are reported in Hertz (Hz) and the multiplicity is abbreviated as s (singlet), d (doublet), t (triplet), m (multiplet), dd (doublet of doublets), br d (broad doublet) etc. Signal assignment was performed with additional information of DEPT135, ( $^1\text{H}, ^1\text{H}$ )-COSY, ( $^1\text{H}, ^{13}\text{C}$ )-HSQC and ( $^1\text{H}, ^{13}\text{C}$ )-HMBC. Atom numbers do not refer to the IUPAC nomenclature.

High resolution mass spectrometry (HRMS) was performed with a *Bruker* Daltonics micrOTOF-Q III (electrospray ionization, ESI) instrument.

## Abbreviations

Boc, *tert*-butoxycarbonyl; CyH, cyclohexane; DMF, *N,N*-dimethylformamide; EtOAc, ethyl acetate; Grubbs 2<sup>nd</sup>, (1,3-Bis(2,4,6-trimethylphenyl)-2-imidazolidinylidene)-dichloro(phenylmethylene)(tricyclohexylphosphine)ruthenium; MeOH, methanol;  $\text{NEt}_3$ , triethylamine; rt, room temperature; TBAF, tetra-*n*-butylammonium fluoride; TBS, *tert*-butyldimethylsilyl-; TFA, trifluoroacetic acid; THF, tetrahydrofuran.

## Chemical synthesis of $\omega$ -azido-sphingosine

### Synthesis route of $\omega$ -azido-sphingosine:

The sphingoid backbone was obtained by olefin cross-metathesis reaction using Grubbs catalyst 2<sup>nd</sup> generation, which is a known method for the synthesis of various sphingolipid derivatives<sup>1,2</sup>. An azide-tagged sphingosine analogue with a C<sub>14</sub>-backbone has already been described by Garrido *et al.* in 2015<sup>3</sup>. Here we synthesized a more natural C<sub>18</sub> long-chain base, starting from the building blocks *tert*-butyl ((2*S*,3*R*)-1-((*tert*-butyldimethylsilyl)oxy)-3-hydroxypent-4-en-2-yl)carbamate (**1**) and 15-bromopentadec-1-ene (**2**). The syntheses of the allylic alcohol (**1**) and the brominated alkene (**2**) were performed according to literature<sup>1,2</sup>. After metathesis reaction, the desired *E*-configured alkene *tert*-butyl ((2*S*,3*R*,*E*)-18-bromo-1-((*tert*-butyldimethylsilyl)oxy)-3-hydroxyoctadec-4-en-2-yl)carbamate (**3**) was isolated in 50% yield by column chromatography. Nucleophilic substitution of the terminal bromide with sodium azide in *N,N*-dimethylformamide afforded *tert*-butyl ((2*S*,3*R*,*E*)-18-azido-1-((*tert*-butyldimethylsilyl)oxy)-3-hydroxyoctadec-4-en-2-yl)carbamate (**4**) in an excellent yield. Subsequent cleavage of the silyl ether using tetra-*n*-butylammonium fluoride in tetrahydrofuran gave diol *tert*-butyl ((2*S*,3*R*,*E*)-18-azido-1,3-dihydroxyoctadec-4-en-2-yl)carbamate (**5**) in quantitative yield. In the final step, a dichloromethane solution of the carbamate was treated with trifluoroacetic acid to provide  $\omega$ -azido-sphingosine (**6**) in 61% yield. All isolated compounds were fully characterized by a combination of <sup>1</sup>H- and <sup>13</sup>C-NMR spectroscopy and HRMS.

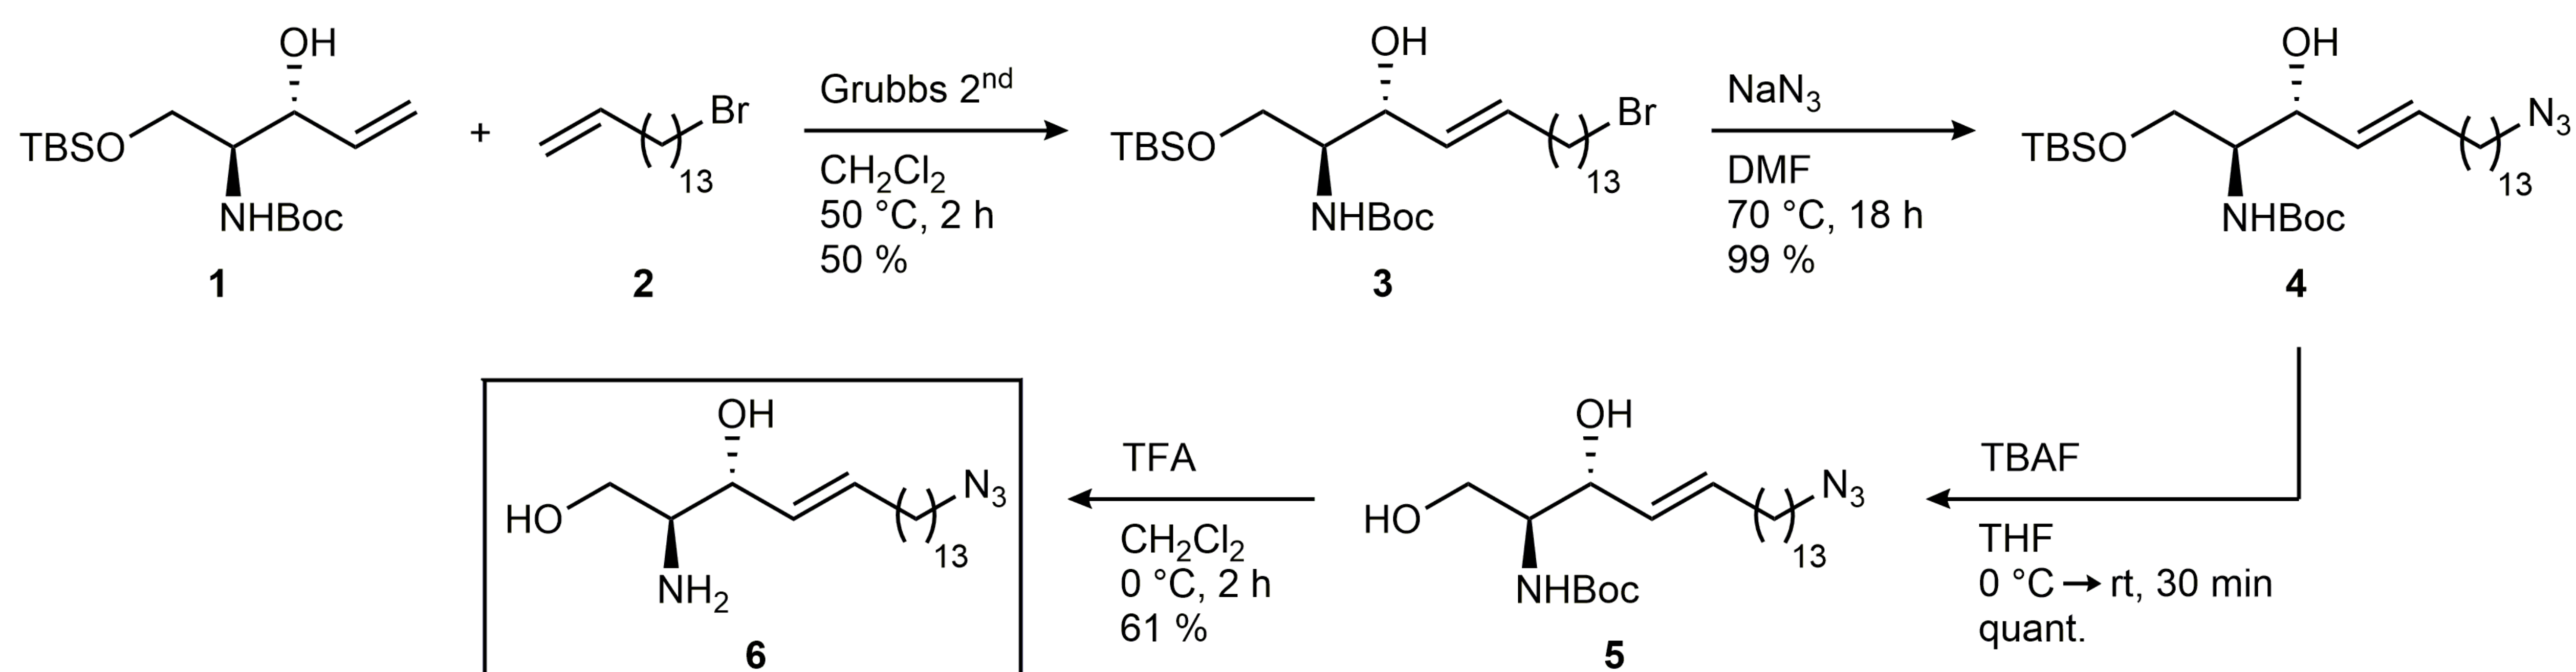

## References

1. Yamamoto, T., Hasegawa, H., Hakogi, T. & Katsumura, S. Versatile synthetic method for sphingolipids and functionalized sphingosine derivatives via olefin cross metathesis. *Org Lett* 8, 5569-5572 (2006).
2. Qu, W., Ploessl, K., Truong, H., Kung, M.P. & Kung, H.F. Iodophenyl tagged sphingosine derivatives: synthesis and preliminary biological evaluation. *Bioorg Med Chem Lett* 19, 3382-3385 (2009).
3. Garrido, M., Abad, J.L., Fabrias, G., Casas, J. & Delgado, A. Azide-tagged sphingolipids: new tools for metabolic flux analysis. *Chembiochem* 16, 641-650 (2015).

# Chemical synthesis of $\omega$ -azido-sphingosine

## Experimental Procedures

### ***tert*-Butyl ((2*S*,3*R*,*E*)-18-bromo-1-((*tert*-butyldimethylsilyl)oxy)-3-hydroxyoctadec-4-en-2-yl)carbamate (**3**)**

To a solution of allylic alcohol **1** (2.00 g, 6.03 mmol, 1.00 eq.) and alkene **2** (6.98 g, 24.1 mmol, 4.00 eq.) in dry CH<sub>2</sub>Cl<sub>2</sub> (50 mL) was added Grubbs catalyst 2<sup>nd</sup> generation (154 mg, 181  $\mu$ mol, 0.03 eq.) at rt. The reaction mixture was stirred at 50 °C for 2 h. The solvent was removed under reduced pressure and the residue was purified by column chromatography on silica gel (CyH:EtOAc, 1:0 to 9:1 v/v) to give **3** (1.80 g, 3.03 mmol, 50 %) as a colourless, waxy solid.

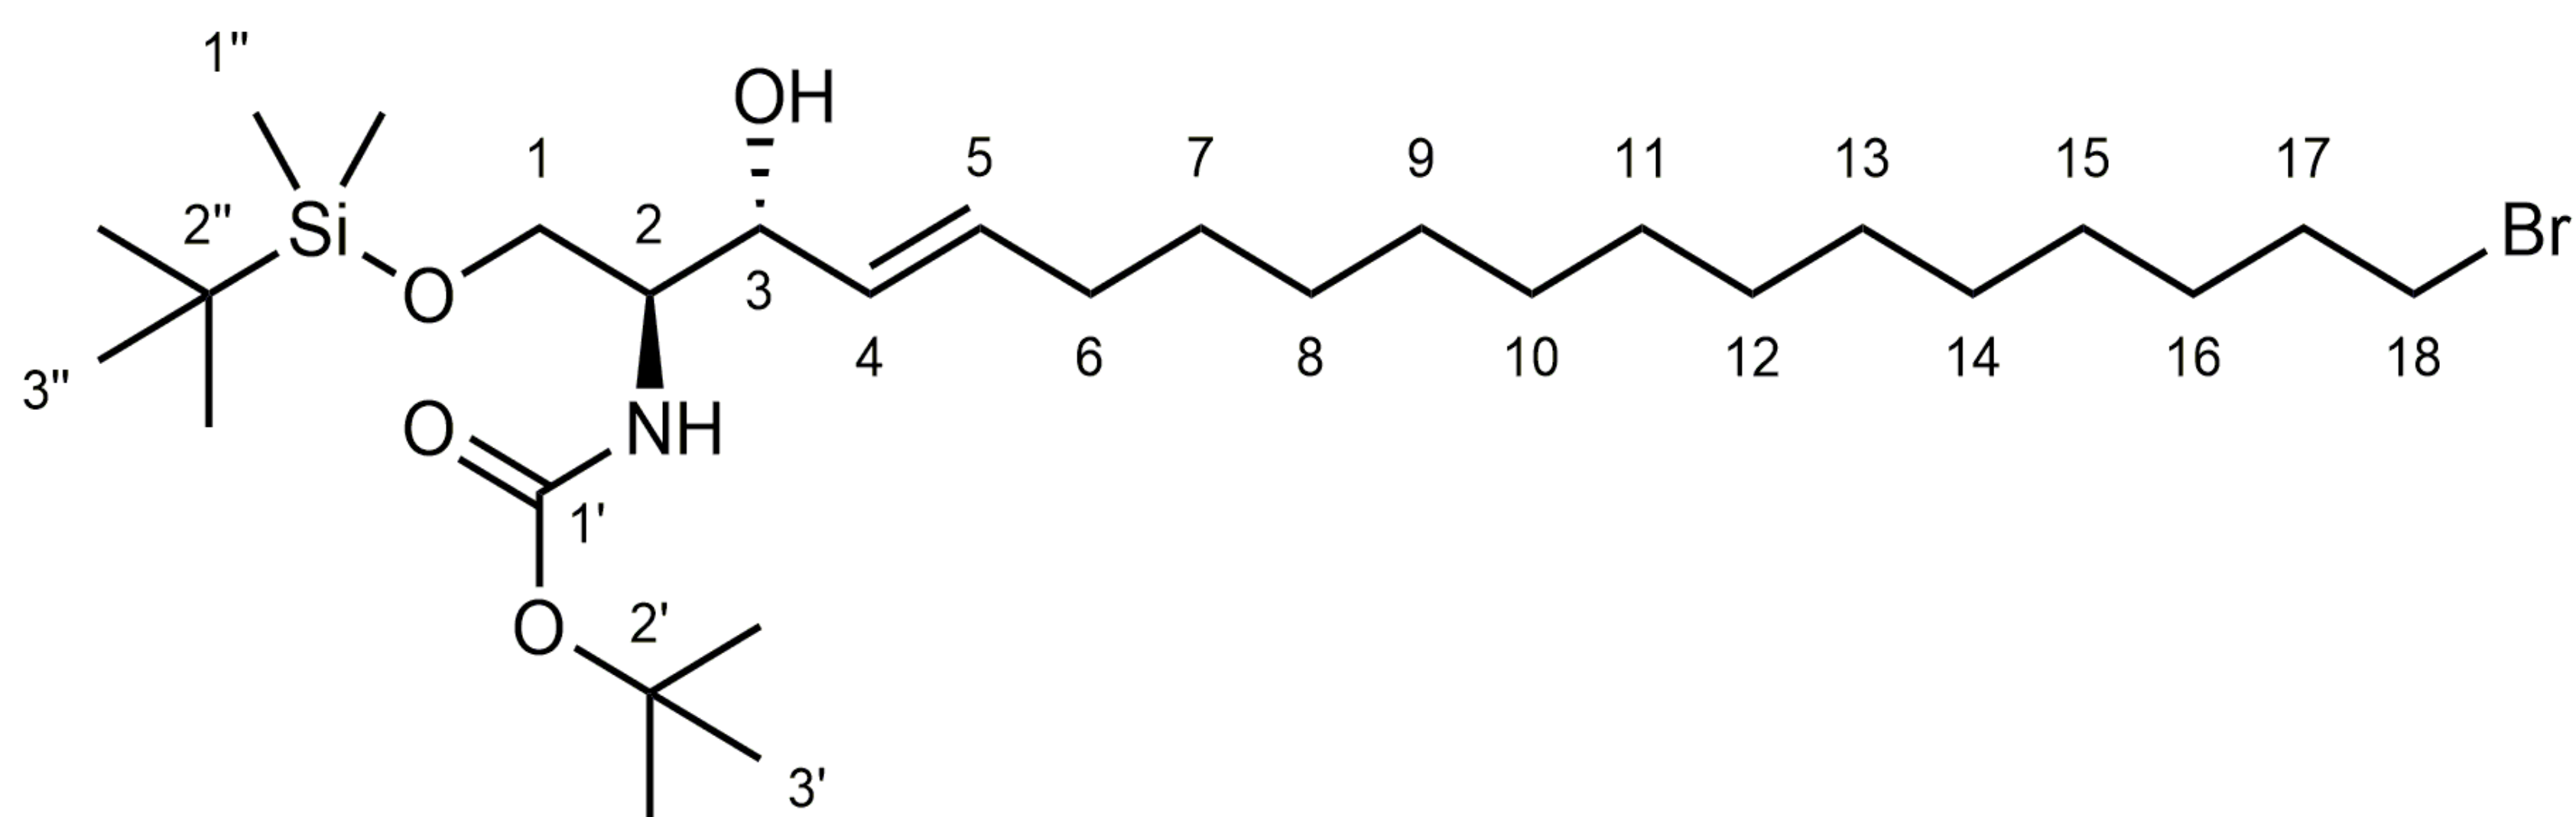

**TLC** (CyH:EtOAc, 9:1 v/v):  $R_f = 0.25$ ; **<sup>1</sup>H NMR** (400 MHz, CDCl<sub>3</sub>):  $\delta$  5.74 (dtd,  $^3J_{5,4} = 15.4$  Hz,  $^3J_{5,6} = 6.8$  Hz,  $^4J_{5,3} = 1.3$  Hz, 1H, *H*-5), 5.49 (ddt,  $^3J_{4,5} = 15.4$  Hz,  $^3J_{4,3} = 5.9$  Hz,  $^4J_{4,6} = 1.3$  Hz, 1H, *H*-4), 5.23 (br d,  $^3J_{\text{NH},2} = 8.2$  Hz, 1H, NH), 4.16–4.20 (m, 1H, *H*-3), 3.93 (dd,  $^2J_{1,1} = 10.3$  Hz,  $^3J_{1,2} = 3.0$  Hz, 1H, *H*-1), 3.74 (br dd,  $^2J_{1,1} = 10.3$  Hz,  $^3J_{1,2} = 2.6$  Hz, 1H, *H*-1), 3.54–3.58 (m, 1H, *H*-2), 3.40 (t,  $^3J_{18,17} = 6.9$  Hz, 2H, *H*-18), 3.33 (br d,  $^3J_{\text{OH},3} = 7.5$  Hz, 1H, OH), 2.02–2.07 (m, 2H, *H*-6), 1.81–1.88 (m, 2H, *H*-17), 1.44 (s, 9H, *H*-3'), 1.25–1.42 (m, 20H, *H*-7–16), 0.89 (s, 9H, *H*-3''), 0.06 (s, 3H, *H*-1'), 0.06 (s, 3H, *H*-1''); **<sup>13</sup>C NMR** (100 MHz, CDCl<sub>3</sub>):  $\delta$  155.9 (C-1'), 133.2 (C-5), 129.6 (C-4), 79.5 (C-2'), 74.8 (C-3), 63.6 (C-1), 54.6 (C-2), 34.2 (C-18), 33.0 (C-17), 32.4 (C-6), 29.8, 29.7, 29.7, 29.6, 29.6, 29.3, 28.9, 28.3 (overall 10C, C-7–16), 28.5 (3C, C-3'), 25.9 (3C, C-3''), 18.2 (C-2''), –5.5 (C-1''), –5.5 (C-1''); **HRMS** (m/z): [M+Na]<sup>+</sup> calcd. for C<sub>29</sub>H<sub>58</sub>BrNNaO<sub>4</sub>Si, 614.3211; found, 614.3223.

## Chemical synthesis of $\omega$ -azido-sphingosine

### ***tert*-Butyl ((2*S*,3*R*,*E*)-18-azido-1-((*tert*-butyldimethylsilyl)oxy)-3-hydroxyoctadec-4-en-2-yl)carbamate (**4**)**

To a solution of bromide **3** (1.00 g, 1.69 mmol, 1.00 eq.) in DMF (20 mL) was added NaN<sub>3</sub> (329 mg, 5.06 mmol, 3.00 eq.). The reaction mixture was stirred at 70 °C for 18 h, cooled to rt and then H<sub>2</sub>O (100 mL) was added. After the extraction with EtOAc (5 x 30 mL), the combined organic phases were washed with brine (20 mL) and dried (MgSO<sub>4</sub>). The solvents were removed under reduced pressure to give **4** (930 mg, 1.68 mmol, 99 %) as a colourless, waxy solid.

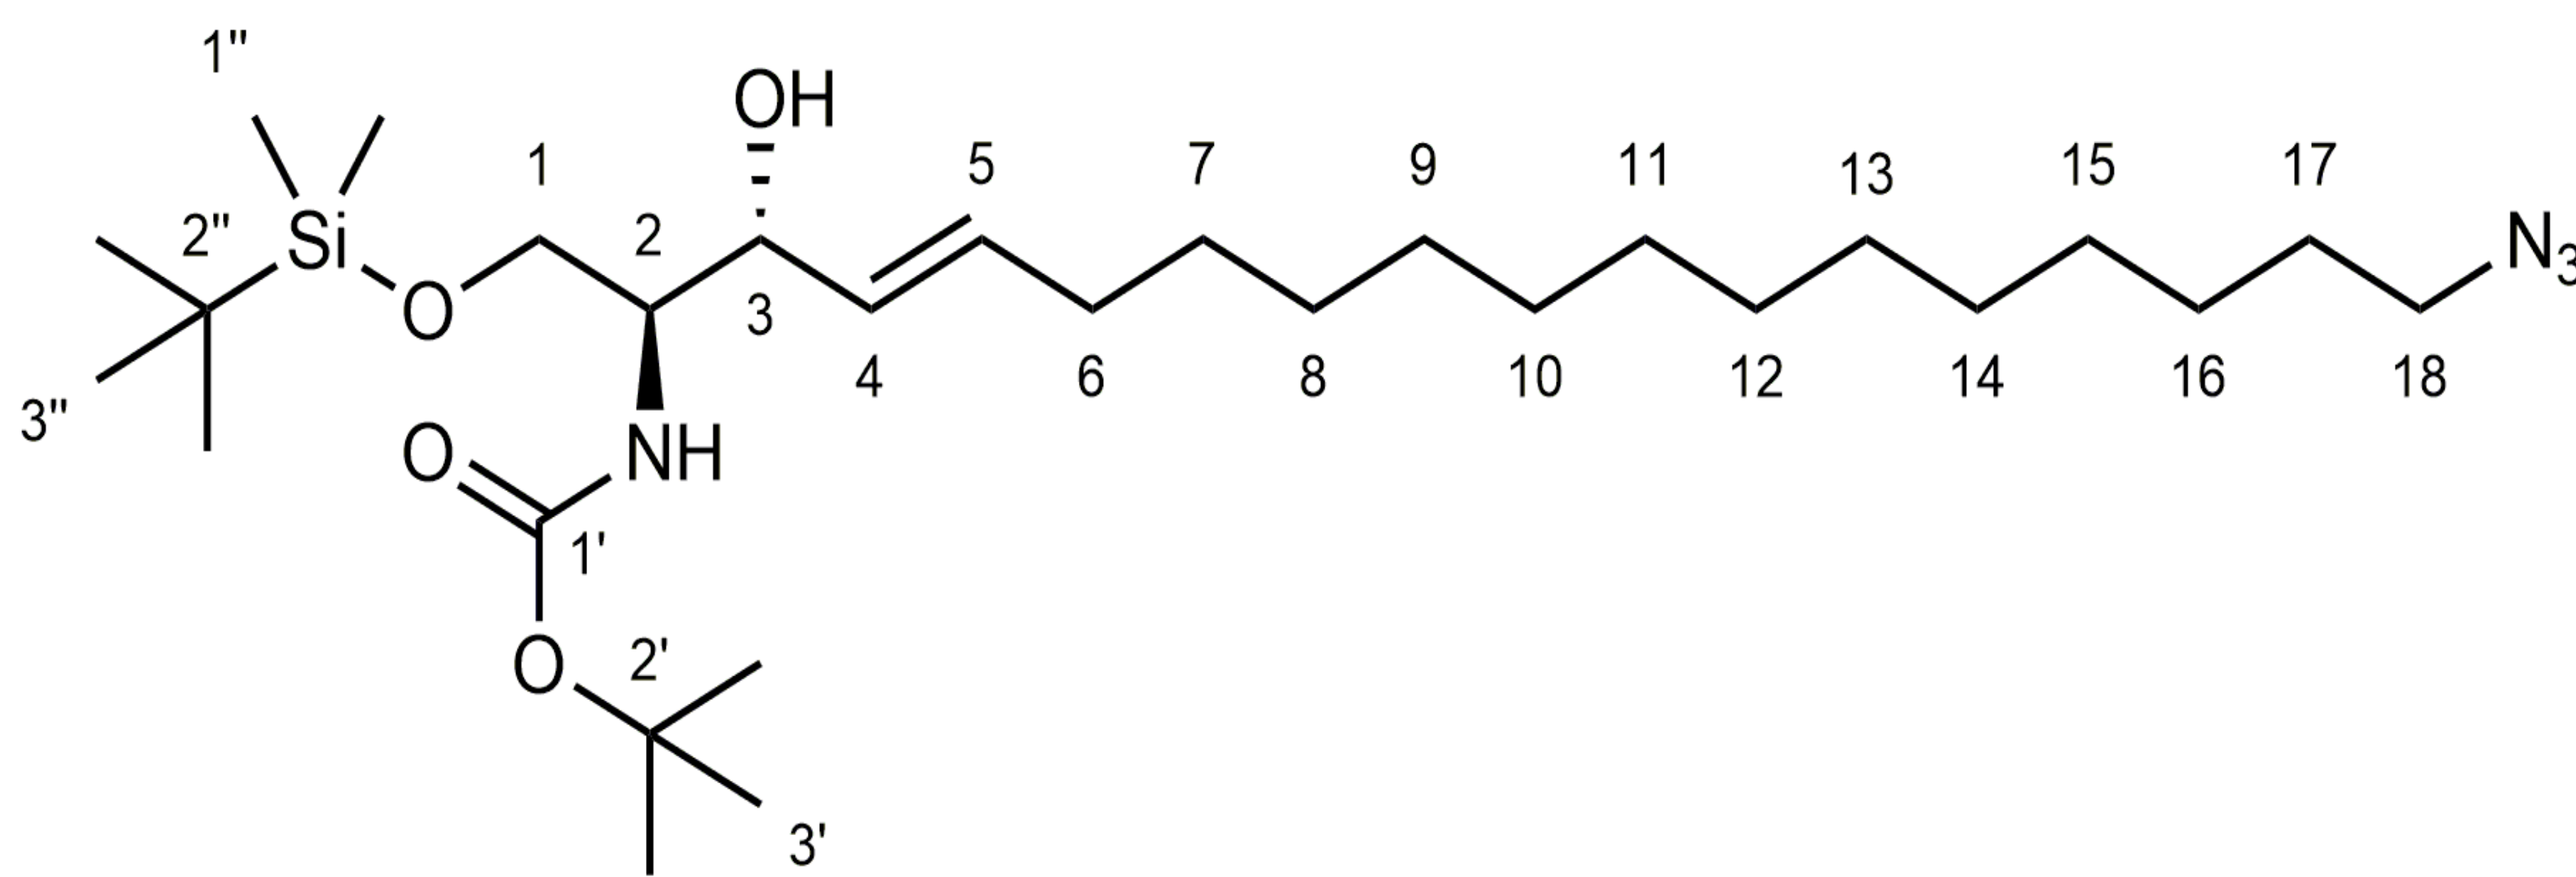

**TLC** (CyH:EtOAc, 9:1 v/v):  $R_f = 0.25$ ; **<sup>1</sup>H NMR** (400 MHz, CDCl<sub>3</sub>):  $\delta$  5.74 (dtd,  $^3J_{5,4} = 15.3$  Hz,  $^3J_{5,6} = 6.8$  Hz,  $^4J_{5,3} = 1.2$  Hz, 1H, *H*-5), 5.49 (ddt,  $^3J_{4,5} = 15.3$  Hz,  $^3J_{4,3} = 5.9$  Hz,  $^4J_{4,6} = 1.3$  Hz, 1H, *H*-4), 5.23 (br d,  $^3J_{\text{NH},2} = 8.2$  Hz, 1H, NH), 4.17–4.19 (m, 1H, *H*-3), 3.92 (dd,  $^2J_{1,1} = 10.3$  Hz,  $^3J_{1,2} = 3.0$  Hz, 1H, *H*-1), 3.74 (br dd,  $^2J_{1,1} = 10.3$  Hz,  $^3J_{1,2} = 2.5$  Hz, 1H, *H*-1), 3.54–3.57 (m, 1H, *H*-2), 3.33 (br s, 1H, OH), 3.24 (t,  $^3J_{18,17} = 7.0$  Hz, 2H, *H*-18), 2.01–2.07 (m, 2H, *H*-6), 1.55–1.62 (m, 2H, *H*-17), 1.44 (s, 9H, *H*-3'), 1.25–1.38 (m, 20H, *H*-7–16), 0.89 (s, 9H, *H*-3''), 0.06 (s, 3H, *H*-1''), 0.05 (s, 3H, *H*-1''); **<sup>13</sup>C NMR** (100 MHz, CDCl<sub>3</sub>):  $\delta$  155.9 (C-1'), 133.2 (C-5), 129.6 (C-4), 79.5 (C-2'), 74.8 (C-3), 63.6 (C-1), 54.6 (C-2), 51.6 (C-18), 32.4 (C-6), 29.8, 29.7, 29.7, 29.6, 29.6, 29.3, 29.3, 26.8 (overall 10C, C-7–16), 29.0 (C-17), 28.5 (3C, C-3'), 25.9 (3C, C-3''), 18.2 (C-2''), –5.5 (C-1''), –5.5 (C-1''); **HRMS** (m/z): [M+Na]<sup>+</sup> calcd. for C<sub>29</sub>H<sub>58</sub>N<sub>4</sub>NaO<sub>4</sub>Si, 577.4120; found, 577.4126.

## Chemical synthesis of $\omega$ -azido-sphingosine

### ***tert*-Butyl ((2*S*,3*R*,*E*)-18-azido-1,3-dihydroxyoctadec-4-en-2-yl)carbamate (**5**)**

To a solution of silyl ether **4** (1.84 g, 3.32 mmol, 1.00 eq.) in dry THF (35 mL) was added TBAF (1 M in THF, 3.98 mL, 3.98 mmol, 1.20 eq.) at 0 °C. The ice bath was removed and the reaction mixture was stirred at rt for 30 min. After the addition of H<sub>2</sub>O (50 mL) and brine (50 mL), the aqueous layer was extracted with EtOAc (5 x 50 mL). The combined organic phases were washed with brine (25 mL), dried (MgSO<sub>4</sub>) and the solvents were removed under reduced pressure. The residue was purified by column chromatography on silica gel (CyH:EtOAc, 2:1 v/v) to give **5** (1.46 g, 3.31 mmol, quant.) as a colourless, waxy solid.

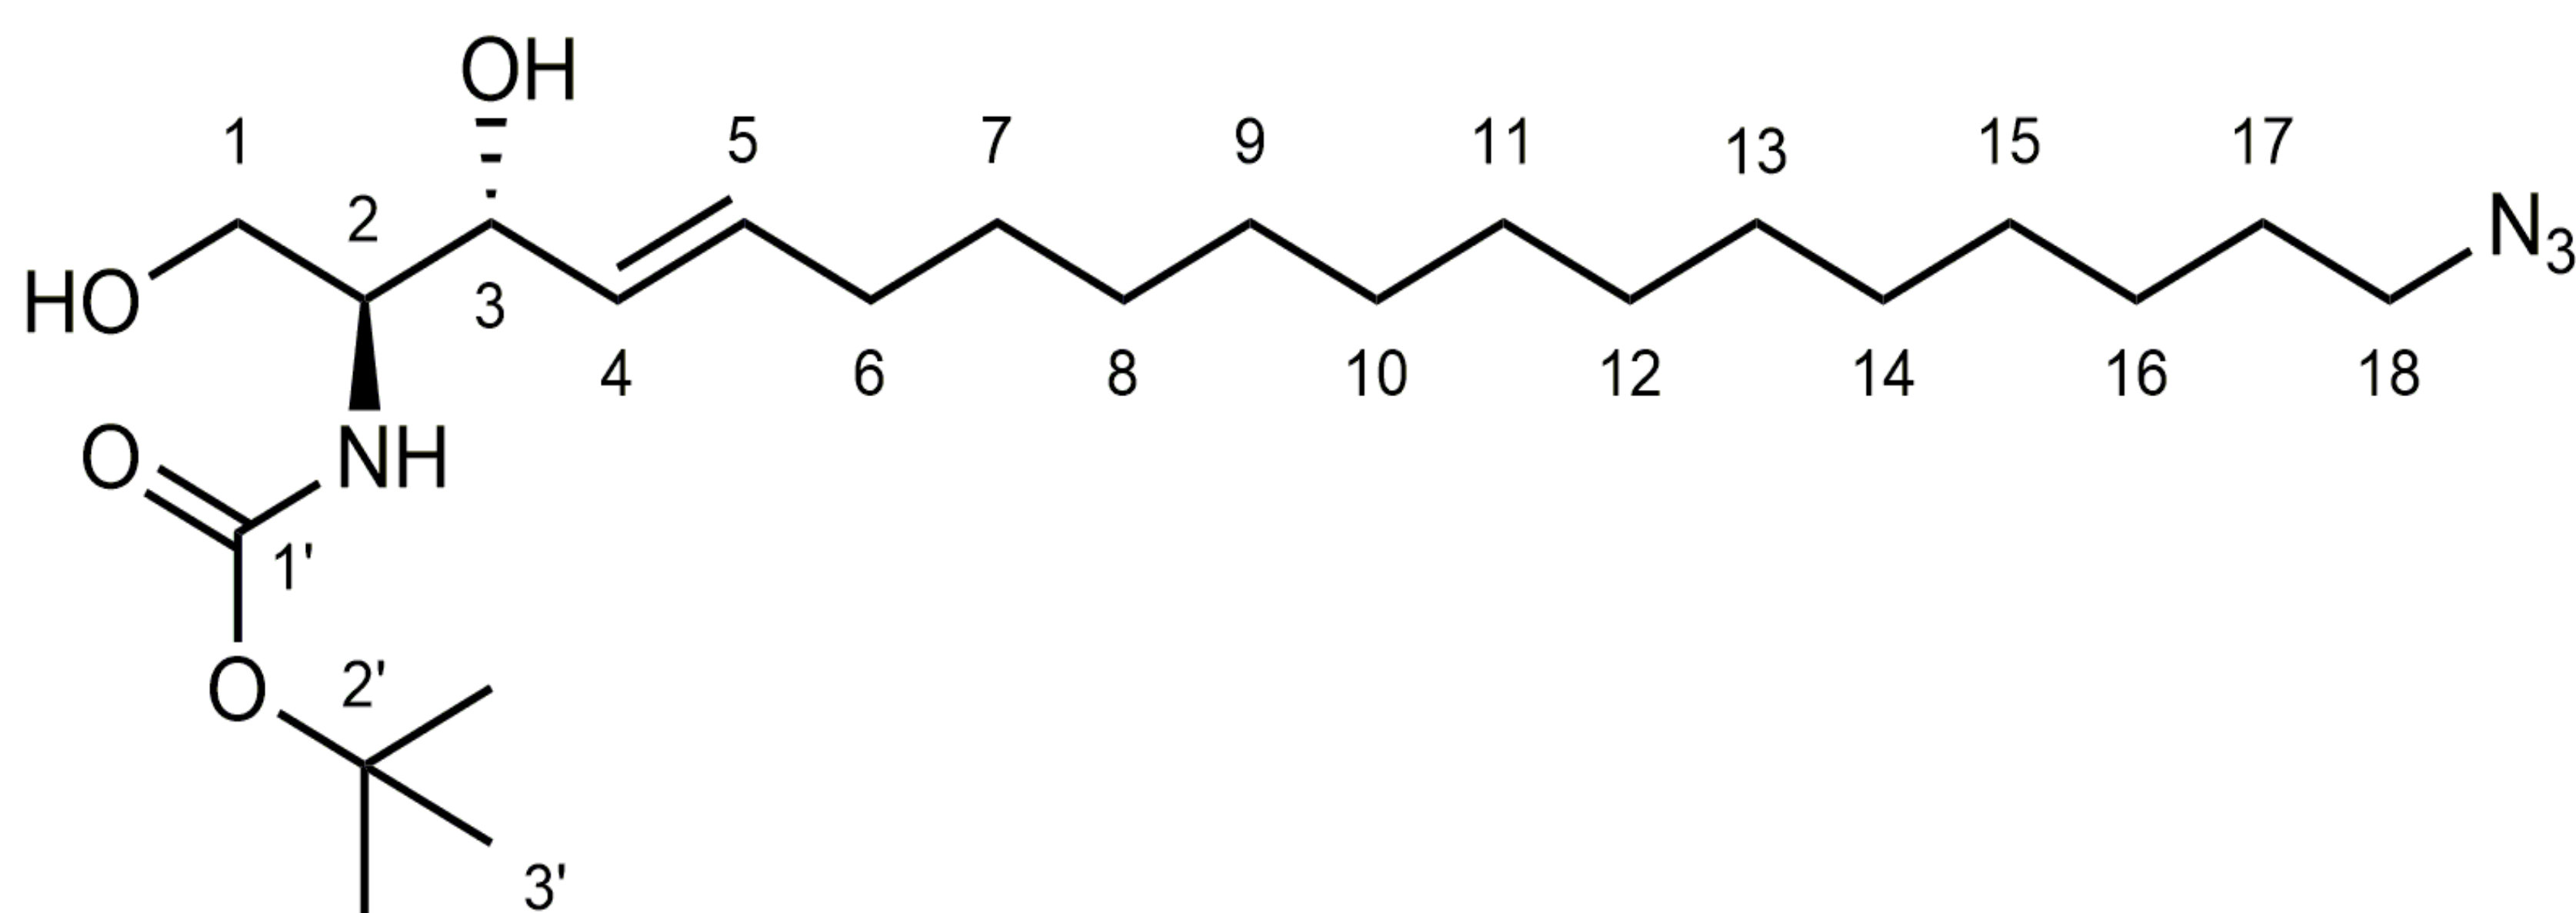

**TLC** (CyH:EtOAc, 2:1 v/v):  $R_f = 0.20$ ; **<sup>1</sup>H NMR** (400 MHz, CDCl<sub>3</sub>):  $\delta$  5.75 (dtd,  $^3J_{5,4} = 15.3$  Hz,  $^3J_{5,6} = 6.8$  Hz,  $^4J_{5,3} = 1.2$  Hz, 1H, *H*-5), 5.50 (ddt,  $^3J_{4,5} = 15.3$  Hz,  $^3J_{4,3} = 6.4$  Hz,  $^4J_{4,6} = 1.2$  Hz, 1H, *H*-4), 5.34 (br d,  $^3J_{\text{NH},2} = 7.9$  Hz, 1H, NH), 4.27–4.29 (m, 1H, *H*-3), 3.91 (dd,  $^2J_{1,1} = 11.3$  Hz,  $^3J_{1,2} = 3.7$  Hz, 1H, *H*-1), 3.68 (dd,  $^2J_{1,1} = 11.3$  Hz,  $^3J_{1,2} = 3.6$  Hz, 1H, *H*-1), 3.56–3.59 (m, 1H, *H*-2), 3.24 (t,  $^3J_{18,17} = 7.0$  Hz, 2H, *H*-18), 3.00 (br s, 2H, 2 x OH), 2.01–2.06 (m, 2H, *H*-6), 1.54–1.62 (m, 2H, *H*-17), 1.43 (s, 9H, *H*-3'), 1.24–1.38 (m, 20H, *H*-7–16); **<sup>13</sup>C NMR** (100 MHz, CDCl<sub>3</sub>):  $\delta$  156.4 (C-1'), 134.2 (C-5), 129.0 (C-4), 79.9 (C-2'), 74.8 (C-3), 62.7 (C-1), 55.5 (C-2), 51.6 (C-18), 32.4 (C-6), 29.7, 29.7, 29.7, 29.6, 29.6, 29.3, 29.3, 29.2, 26.8 (overall 10C, C-7–16), 28.9 (C-17), 28.5 (3C, C-3'); **HRMS** (m/z): [M+Na]<sup>+</sup> calcd. for C<sub>23</sub>H<sub>44</sub>N<sub>4</sub>NaO<sub>4</sub>, 463.3255; found, 463.3250.

## Chemical synthesis of $\omega$ -azido-sphingosine

### **(2*S*,3*R*,*E*)-2-Amino-18-azidooctadec-4-ene-1,3-diol / $\omega$ -azido-sphingosine (6)**

To a solution of carbamate **5** (900 mg, 2.04 mmol) in CH<sub>2</sub>Cl<sub>2</sub> (20 mL) was added TFA (4.72 mL) at 0 °C. The reaction mixture was stirred at 0 °C for 2 h and subsequently treated with H<sub>2</sub>O (100 mL) and 1 M aq. NaOH (100 mL). After the extraction with EtOAc (10 x 50 mL), the combined organic phases were washed with brine (10 mL), dried (MgSO<sub>4</sub>) and concentrated under reduced pressure. The residue was purified by column chromatography on silica gel (CH<sub>2</sub>Cl<sub>2</sub>:MeOH, 9:1 v/v) to give **6** (423 mg, 1.24 mmol, 61 %) as a colourless, waxy solid.

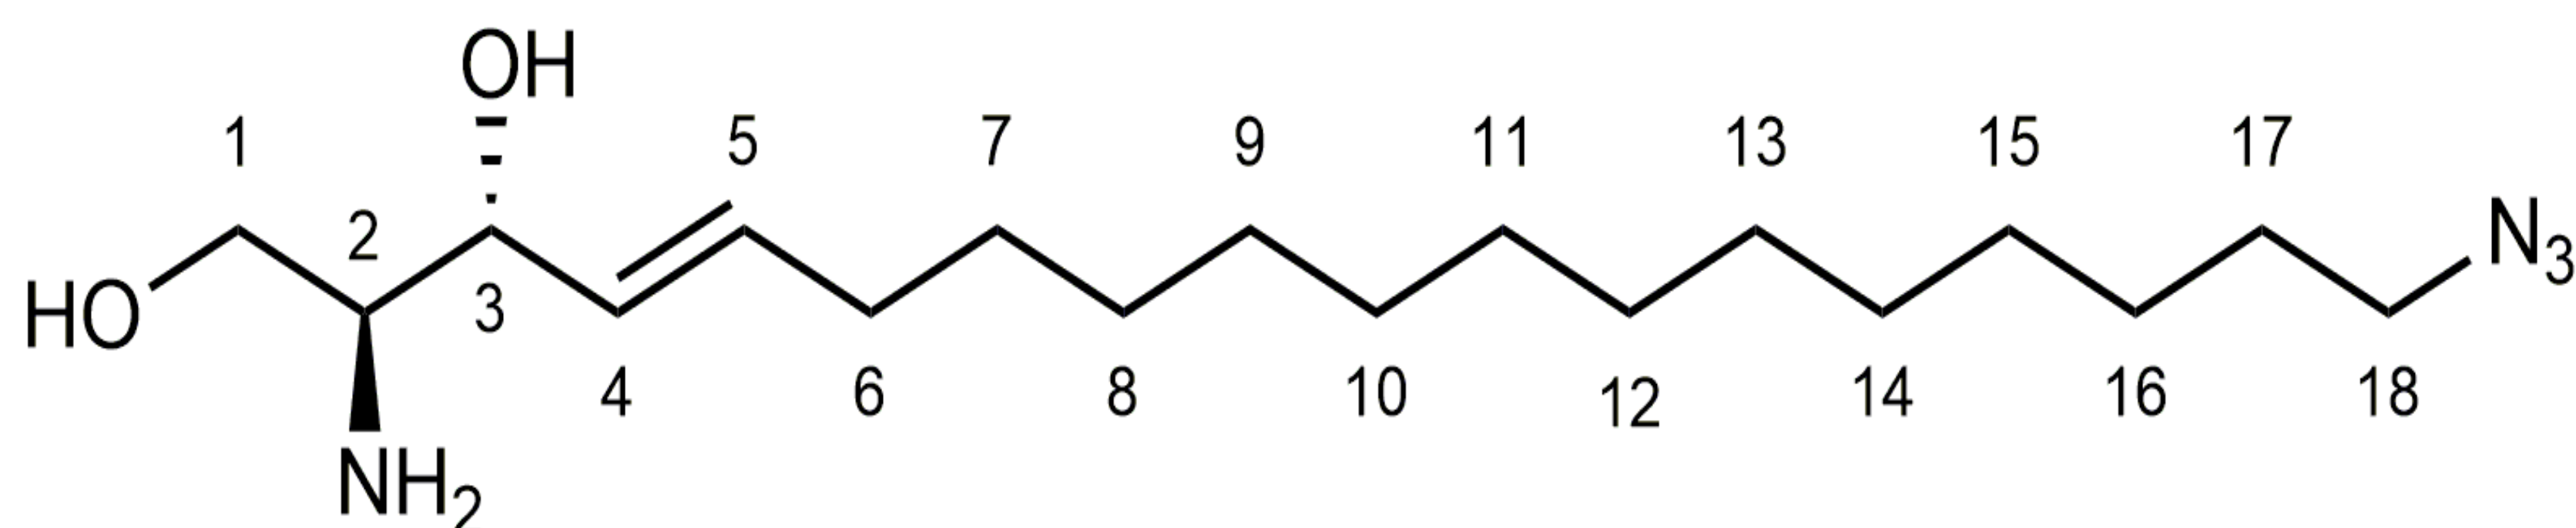

**TLC** (CH<sub>2</sub>Cl<sub>2</sub>:MeOH:NEt<sub>3</sub>, 10:1:0.1 v/v): R<sub>f</sub> = 0.08; **<sup>1</sup>H NMR** (400 MHz, CD<sub>3</sub>OD):  $\delta$  5.76 (dtd, <sup>3</sup>J<sub>5,4</sub> = 15.3 Hz, <sup>3</sup>J<sub>5,6</sub> = 6.8 Hz, <sup>4</sup>J<sub>5,3</sub> = 1.0 Hz, 1H, *H*-5), 5.49 (ddt, <sup>3</sup>J<sub>4,5</sub> = 15.3 Hz, <sup>3</sup>J<sub>4,3</sub> = 7.3 Hz, <sup>4</sup>J<sub>4,6</sub> = 1.4 Hz, 1H, *H*-4), 4.02–4.06 (m, 1H, *H*-3), 3.70 (dd, <sup>2</sup>J<sub>1,1</sub> = 11.0 Hz, <sup>3</sup>J<sub>1,2</sub> = 4.4 Hz, 1H, *H*-1), 3.53 (dd, <sup>2</sup>J<sub>1,1</sub> = 11.0 Hz, <sup>3</sup>J<sub>1,2</sub> = 7.3 Hz, 1H, *H*-1), 3.28 (t, <sup>3</sup>J<sub>18,17</sub> = 6.9 Hz, 2H, *H*-18), 2.85 (ddd, <sup>3</sup>J<sub>2,1</sub> = 7.3 Hz, <sup>3</sup>J<sub>2,3</sub> = 5.8 Hz, <sup>3</sup>J<sub>2,1</sub> = 4.4 Hz, 1H, *H*-2), 2.06–2.11 (m, 2H, *H*-6), 1.55–1.62 (m, 2H, *H*-17), 1.30–1.44 (m, 20H, *H*-7–16); **<sup>13</sup>C NMR** (100 MHz, CD<sub>3</sub>OD):  $\delta$  135.6 (*C*-5), 130.3 (*C*-4), 74.2 (*C*-3), 63.2 (*C*-1), 58.1 (*C*-2), 52.4 (*C*-18), 33.4 (*C*-6), 30.8, 30.7, 30.7, 30.6, 30.4, 30.3, 30.3, 27.8 (overall 10C, *C*-7–16), 29.9 (*C*-17); **HRMS** (*m/z*): [M+H]<sup>+</sup> calcd. for C<sub>18</sub>H<sub>37</sub>N<sub>4</sub>O<sub>2</sub>, 341.2911; found, 341.2917.

# Supplementary Figure 1

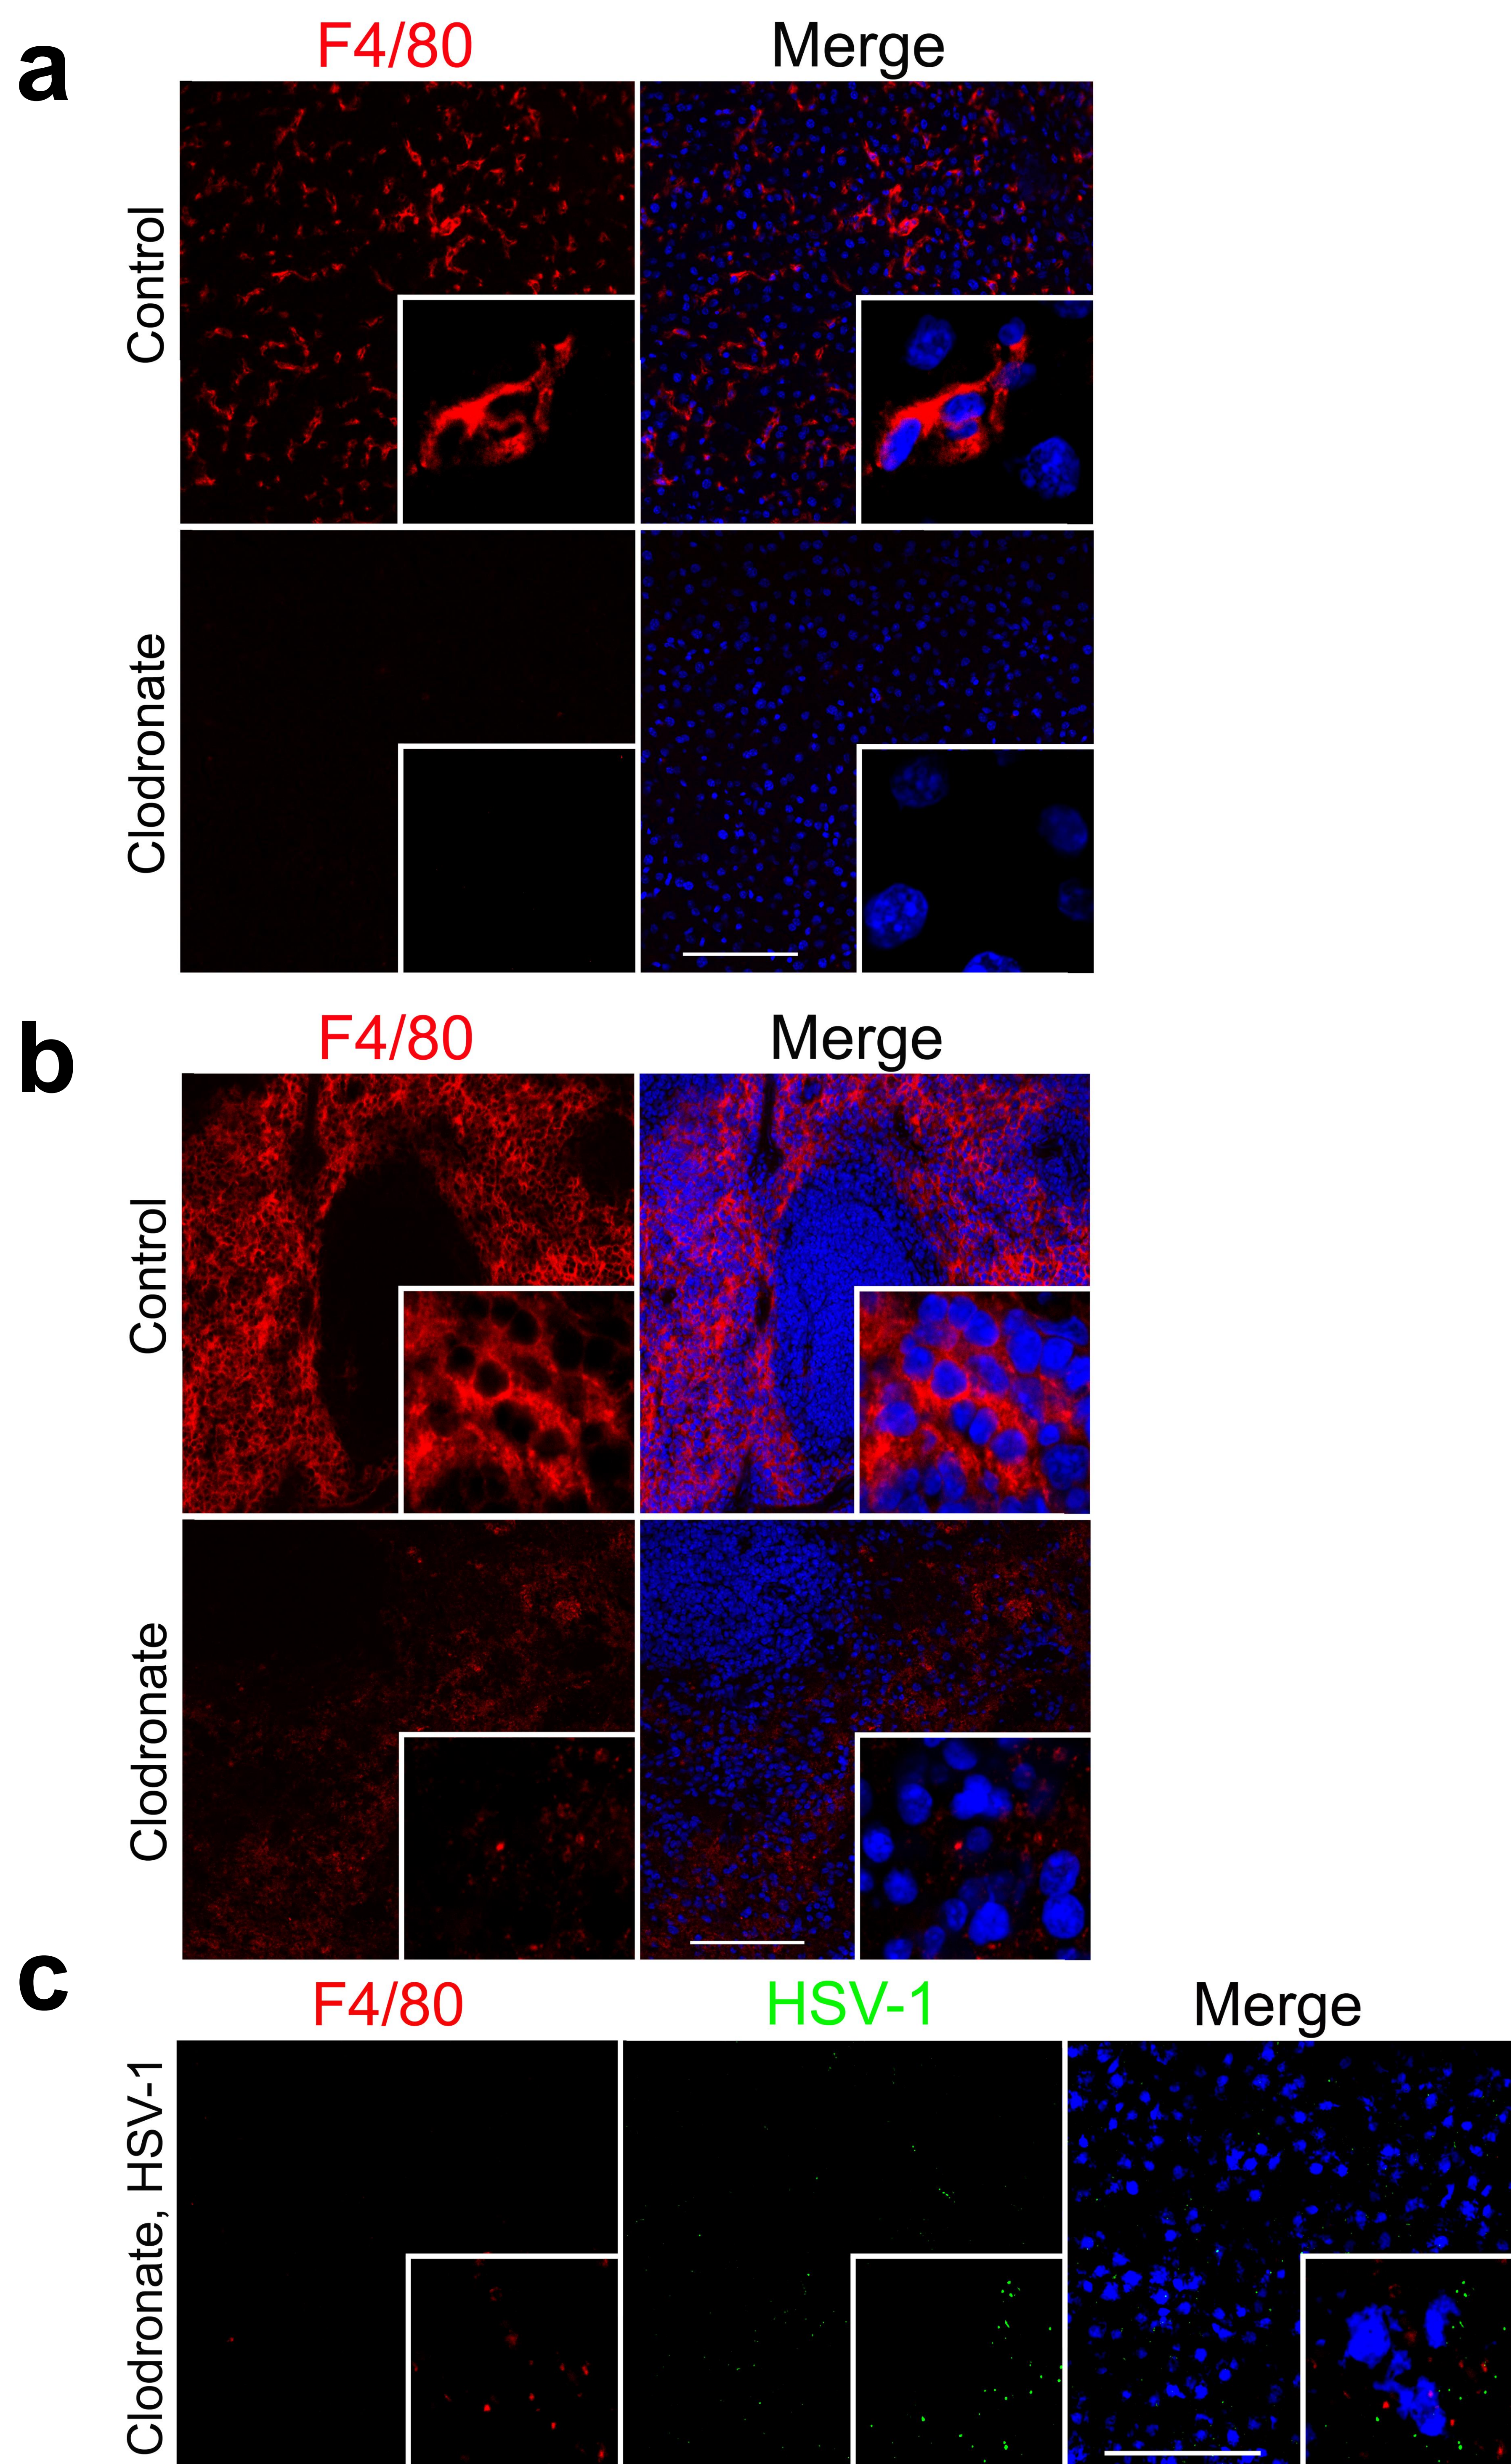

## Supplementary Figure 1: Efficiency of macrophage depletion by clodronate

**a&b:** Immunofluorescence of livers (a) and spleens (b) from wild-type (WT) mice that were pretreated with control-liposomes and WT mice that were pretreated with clodronate-liposomes (day -3), infected with  $6 \times 10^6$  tissue culture infection dose 50 (TCID<sub>50</sub>) HSV-1 and analyzed after 24 h (n = 3, blue represents Hoechst staining, scale bar 100 μm). **c:** Immunofluorescence of livers from WT mice that were pretreated with clodronate-liposomes (day -3), infected with  $8 \times 10^7$  TCID<sub>50</sub> HSV-1 and analyzed after 1 h (n = 3, blue represents Hoechst staining, scale bar 100 μm).



# Supplementary Figure 2

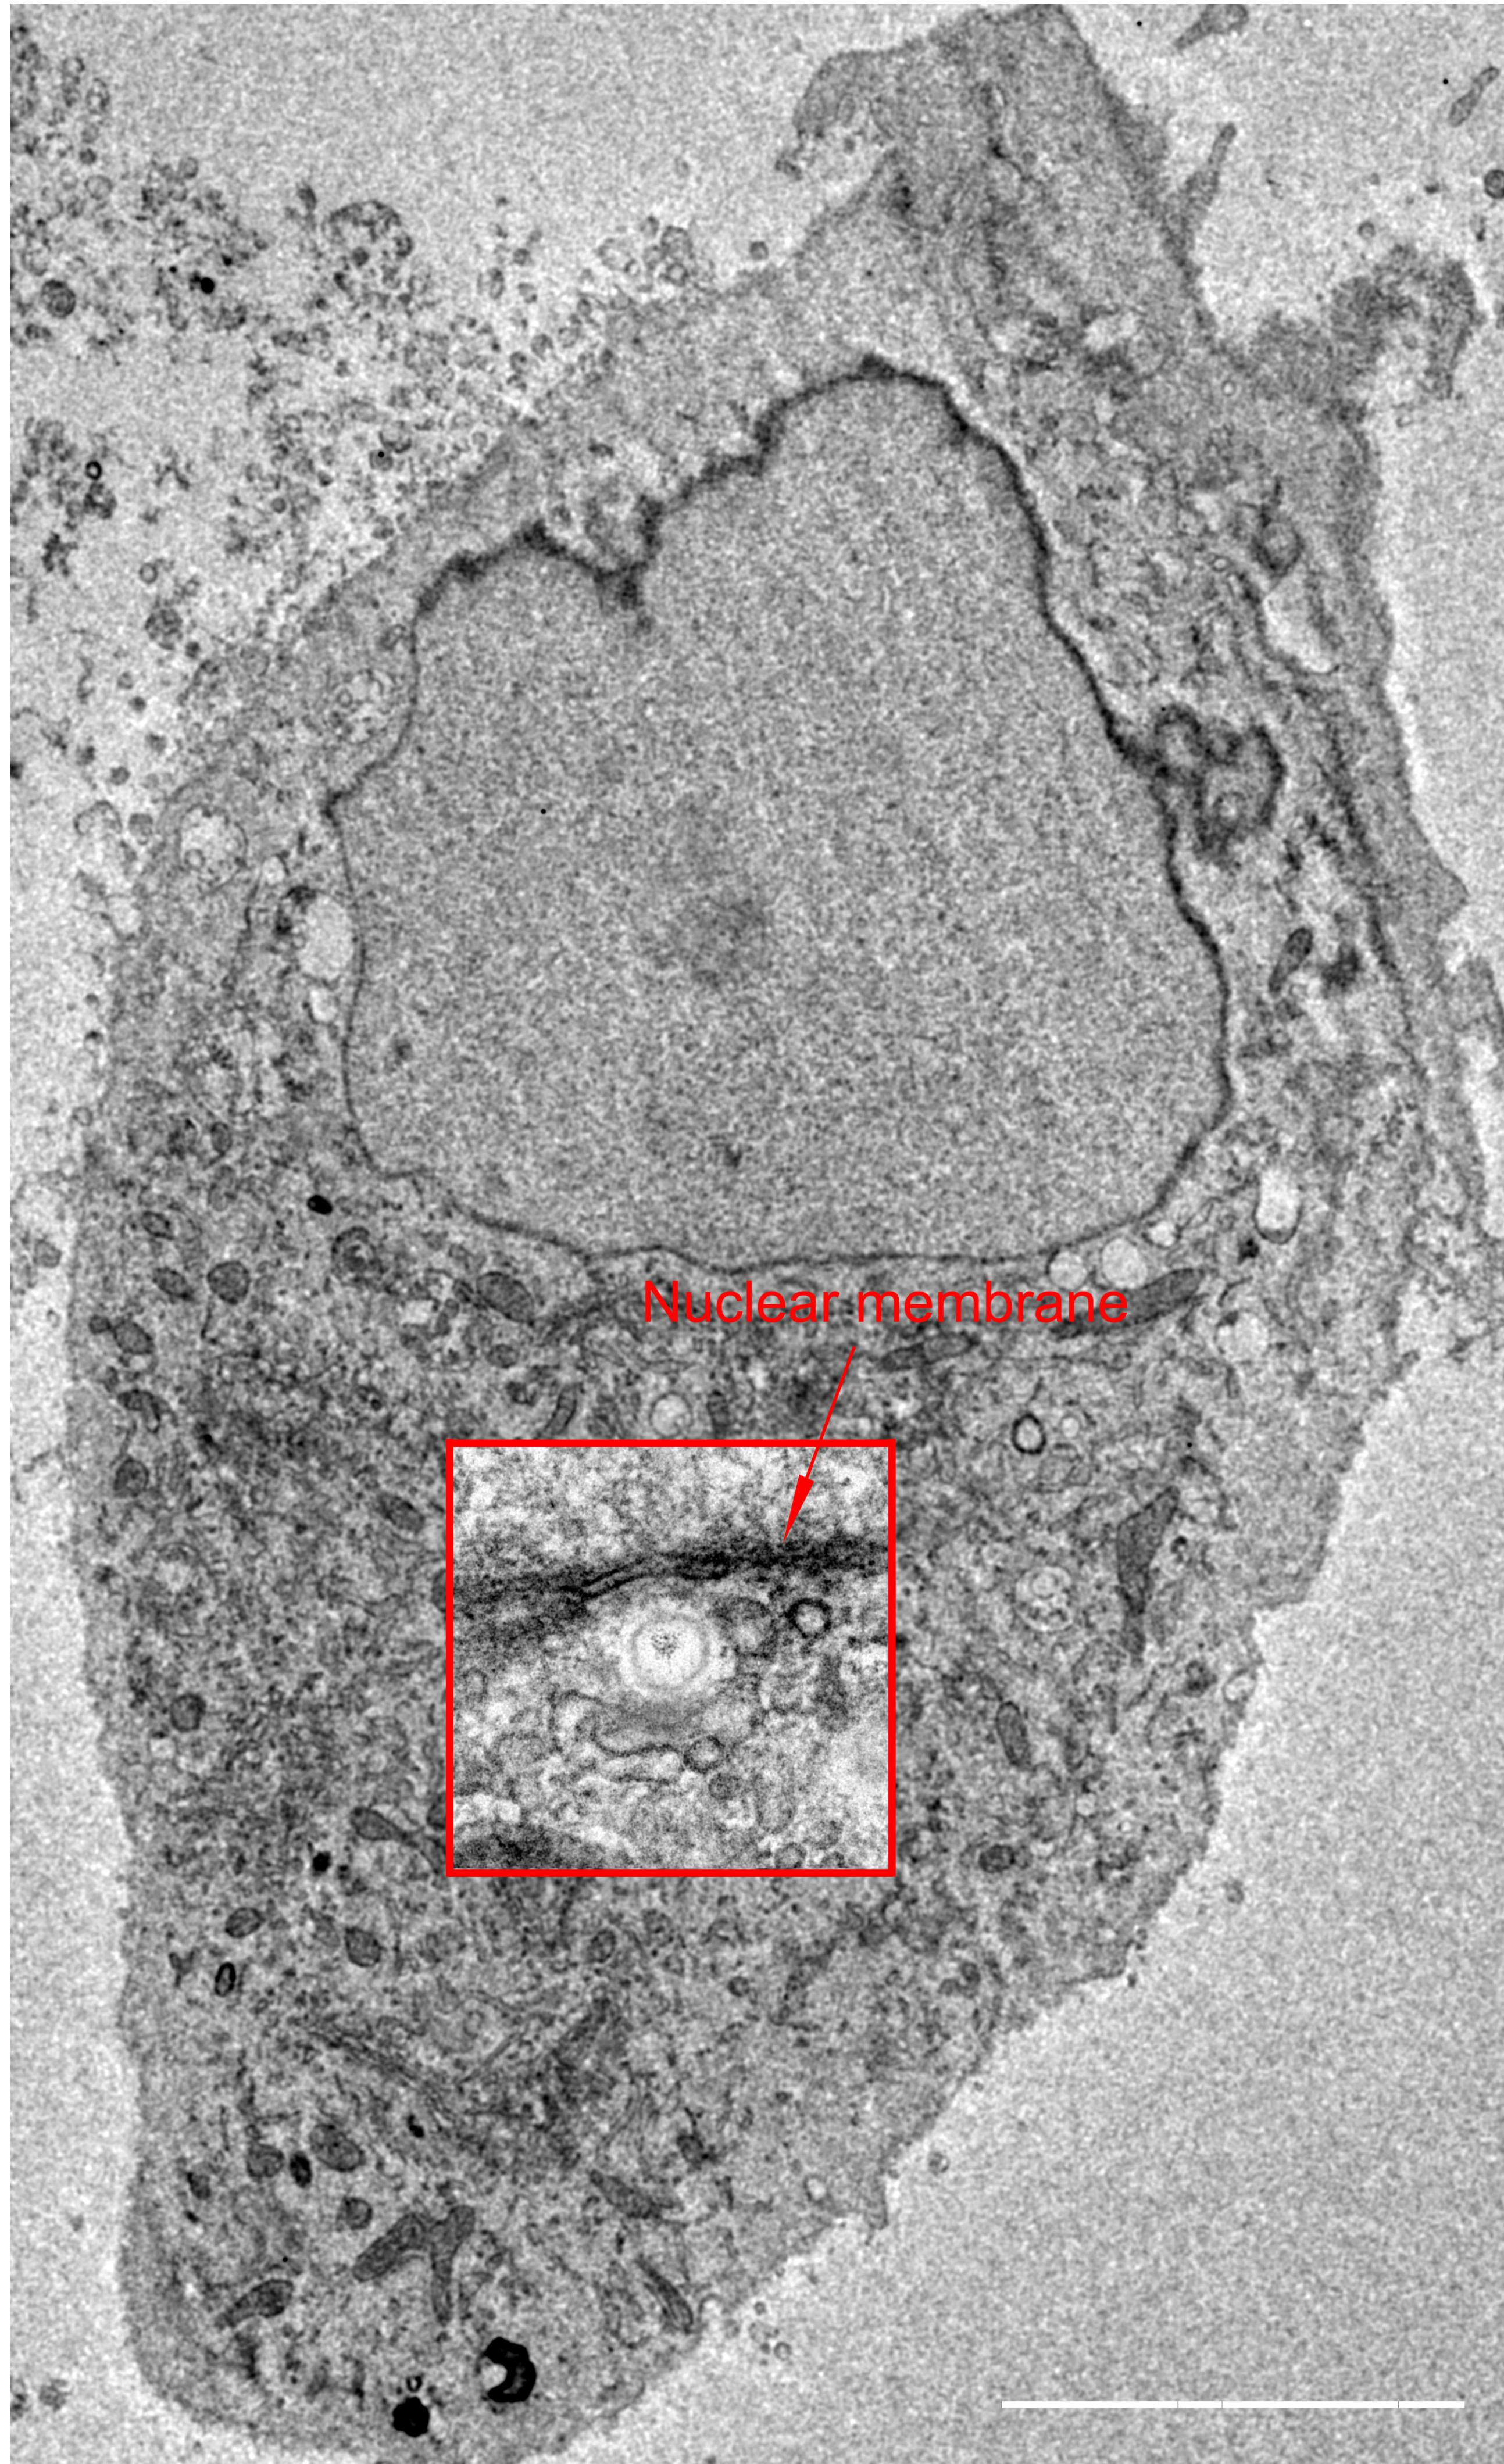

## Supplementary Figure 2: Herpes simplex virus type 1 (HSV-1) infection of primary fibroblasts

Representative electron microscopy images of wild-type (WT) fibroblasts infected with HSV-1 (MOI 250) analyzed after 30 minutes (n = 106 images from three independent experiments, scale bar 5  $\mu\text{m}$ ). Detail shows HSV-1 close to the nucleus.

# Supplementary Figure 3

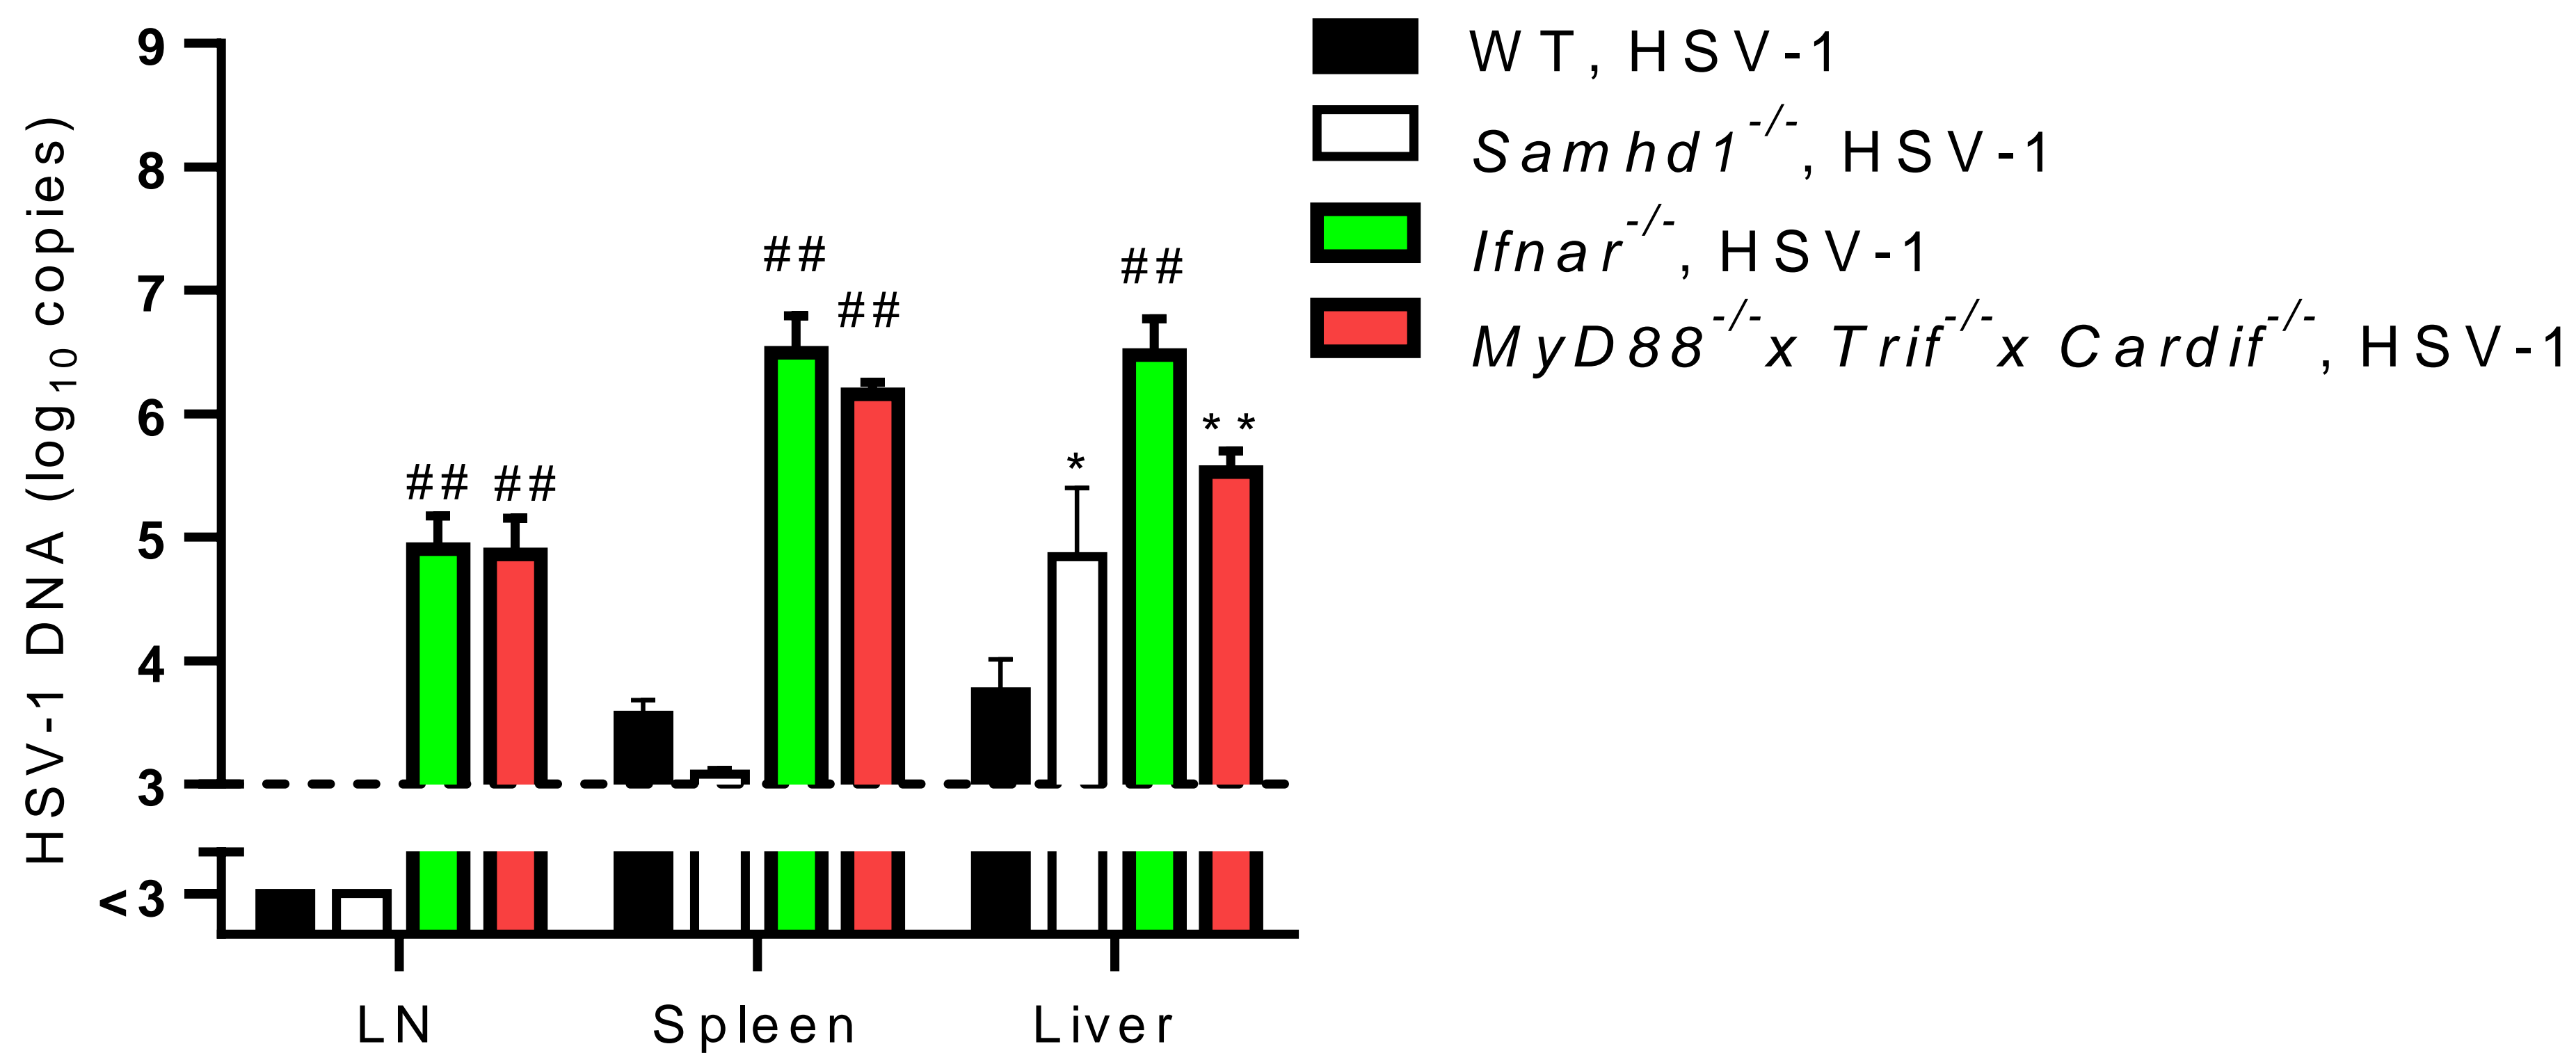

## Supplementary Figure 3: Real-time polymerase chain reaction (RT-PCR) for herpes simplex virus type 1 (HSV-1) in mice with different innate immune deficiencies

RT-PCR of lymph nodes (LN), spleens and livers from wild-type (WT; n = 9), *Samhd1*<sup>-/-</sup> (n = 4), *Ifnar1*<sup>-/-</sup> (n = 4), and *MyD88*<sup>-/-</sup> x *Trif*<sup>-/-</sup> x *Cardif*<sup>-/-</sup> (n = 3) mice that were infected with 2×10<sup>6</sup> tissue culture infection dose 50 (TCID<sub>50</sub>) HSV-1 and analyzed on day 3 (2way Anova [Tukey's multiple comparison]). All data are shown as mean +/- SEM. \* equals p ≤ 0.05, \*\* equals p ≤ 0.01, # equals p ≤ 0.001, ## equals p ≤ 0.0001.

# Supplementary Figure 4

**a**

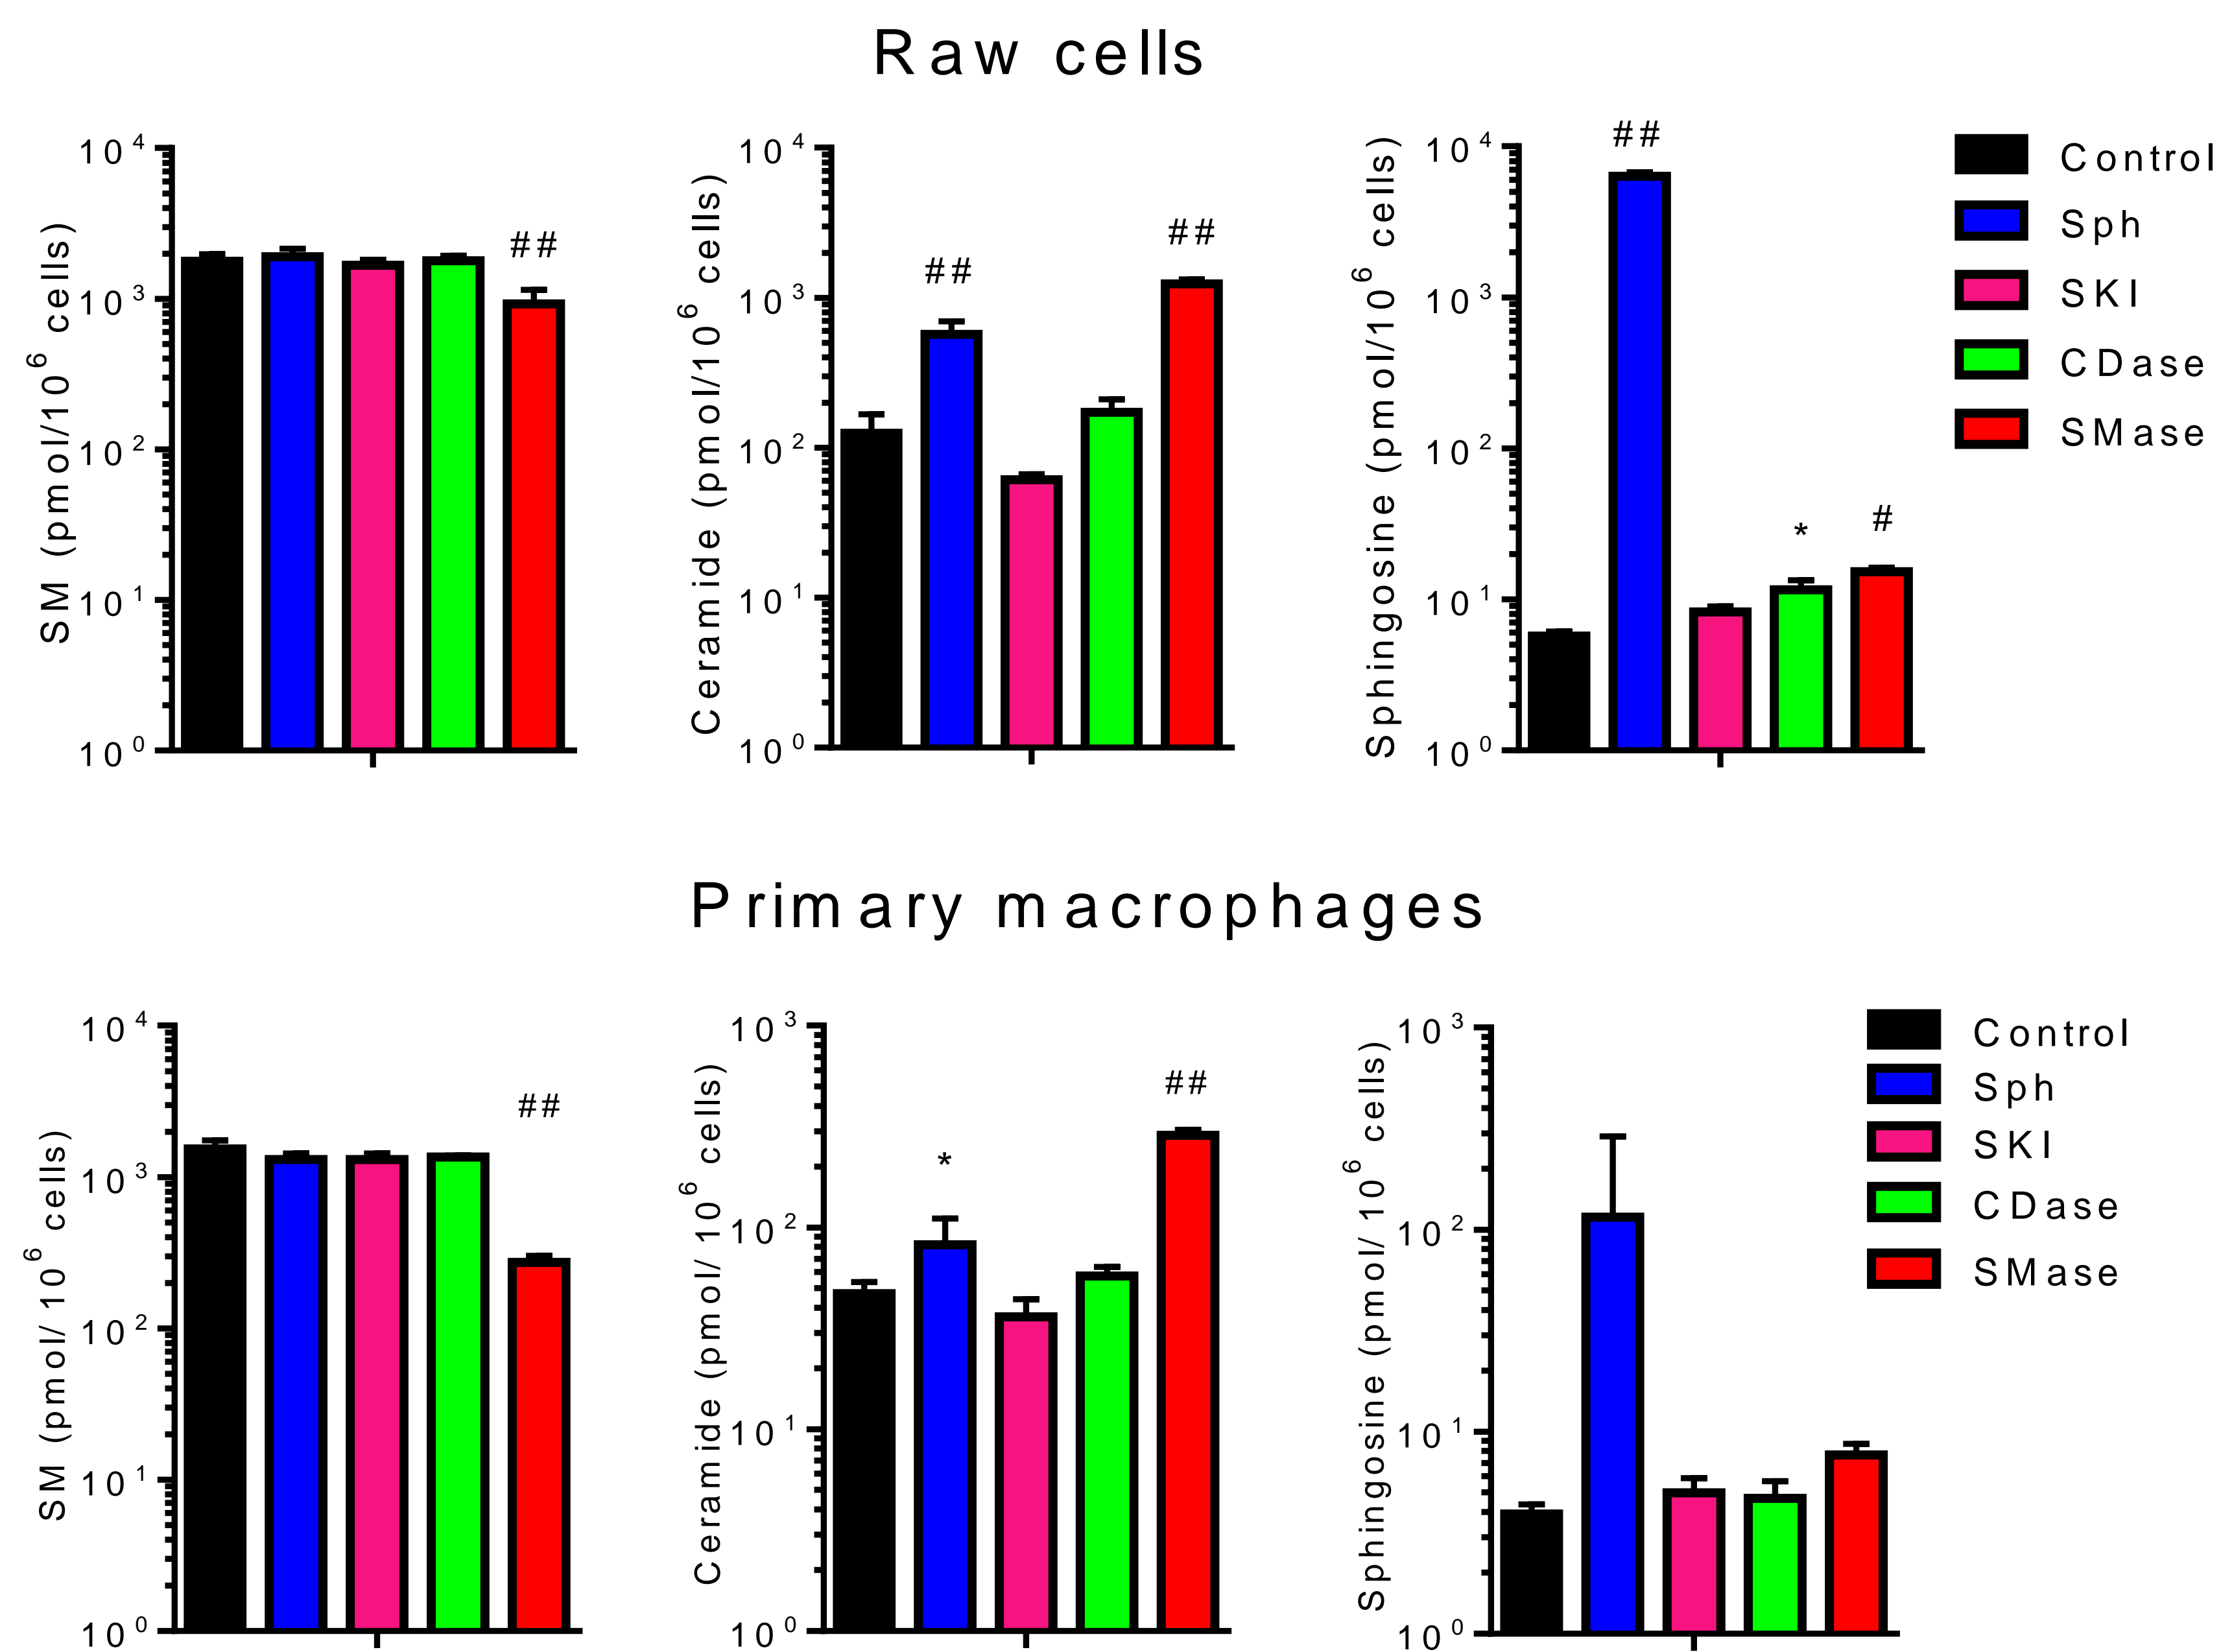

**b**

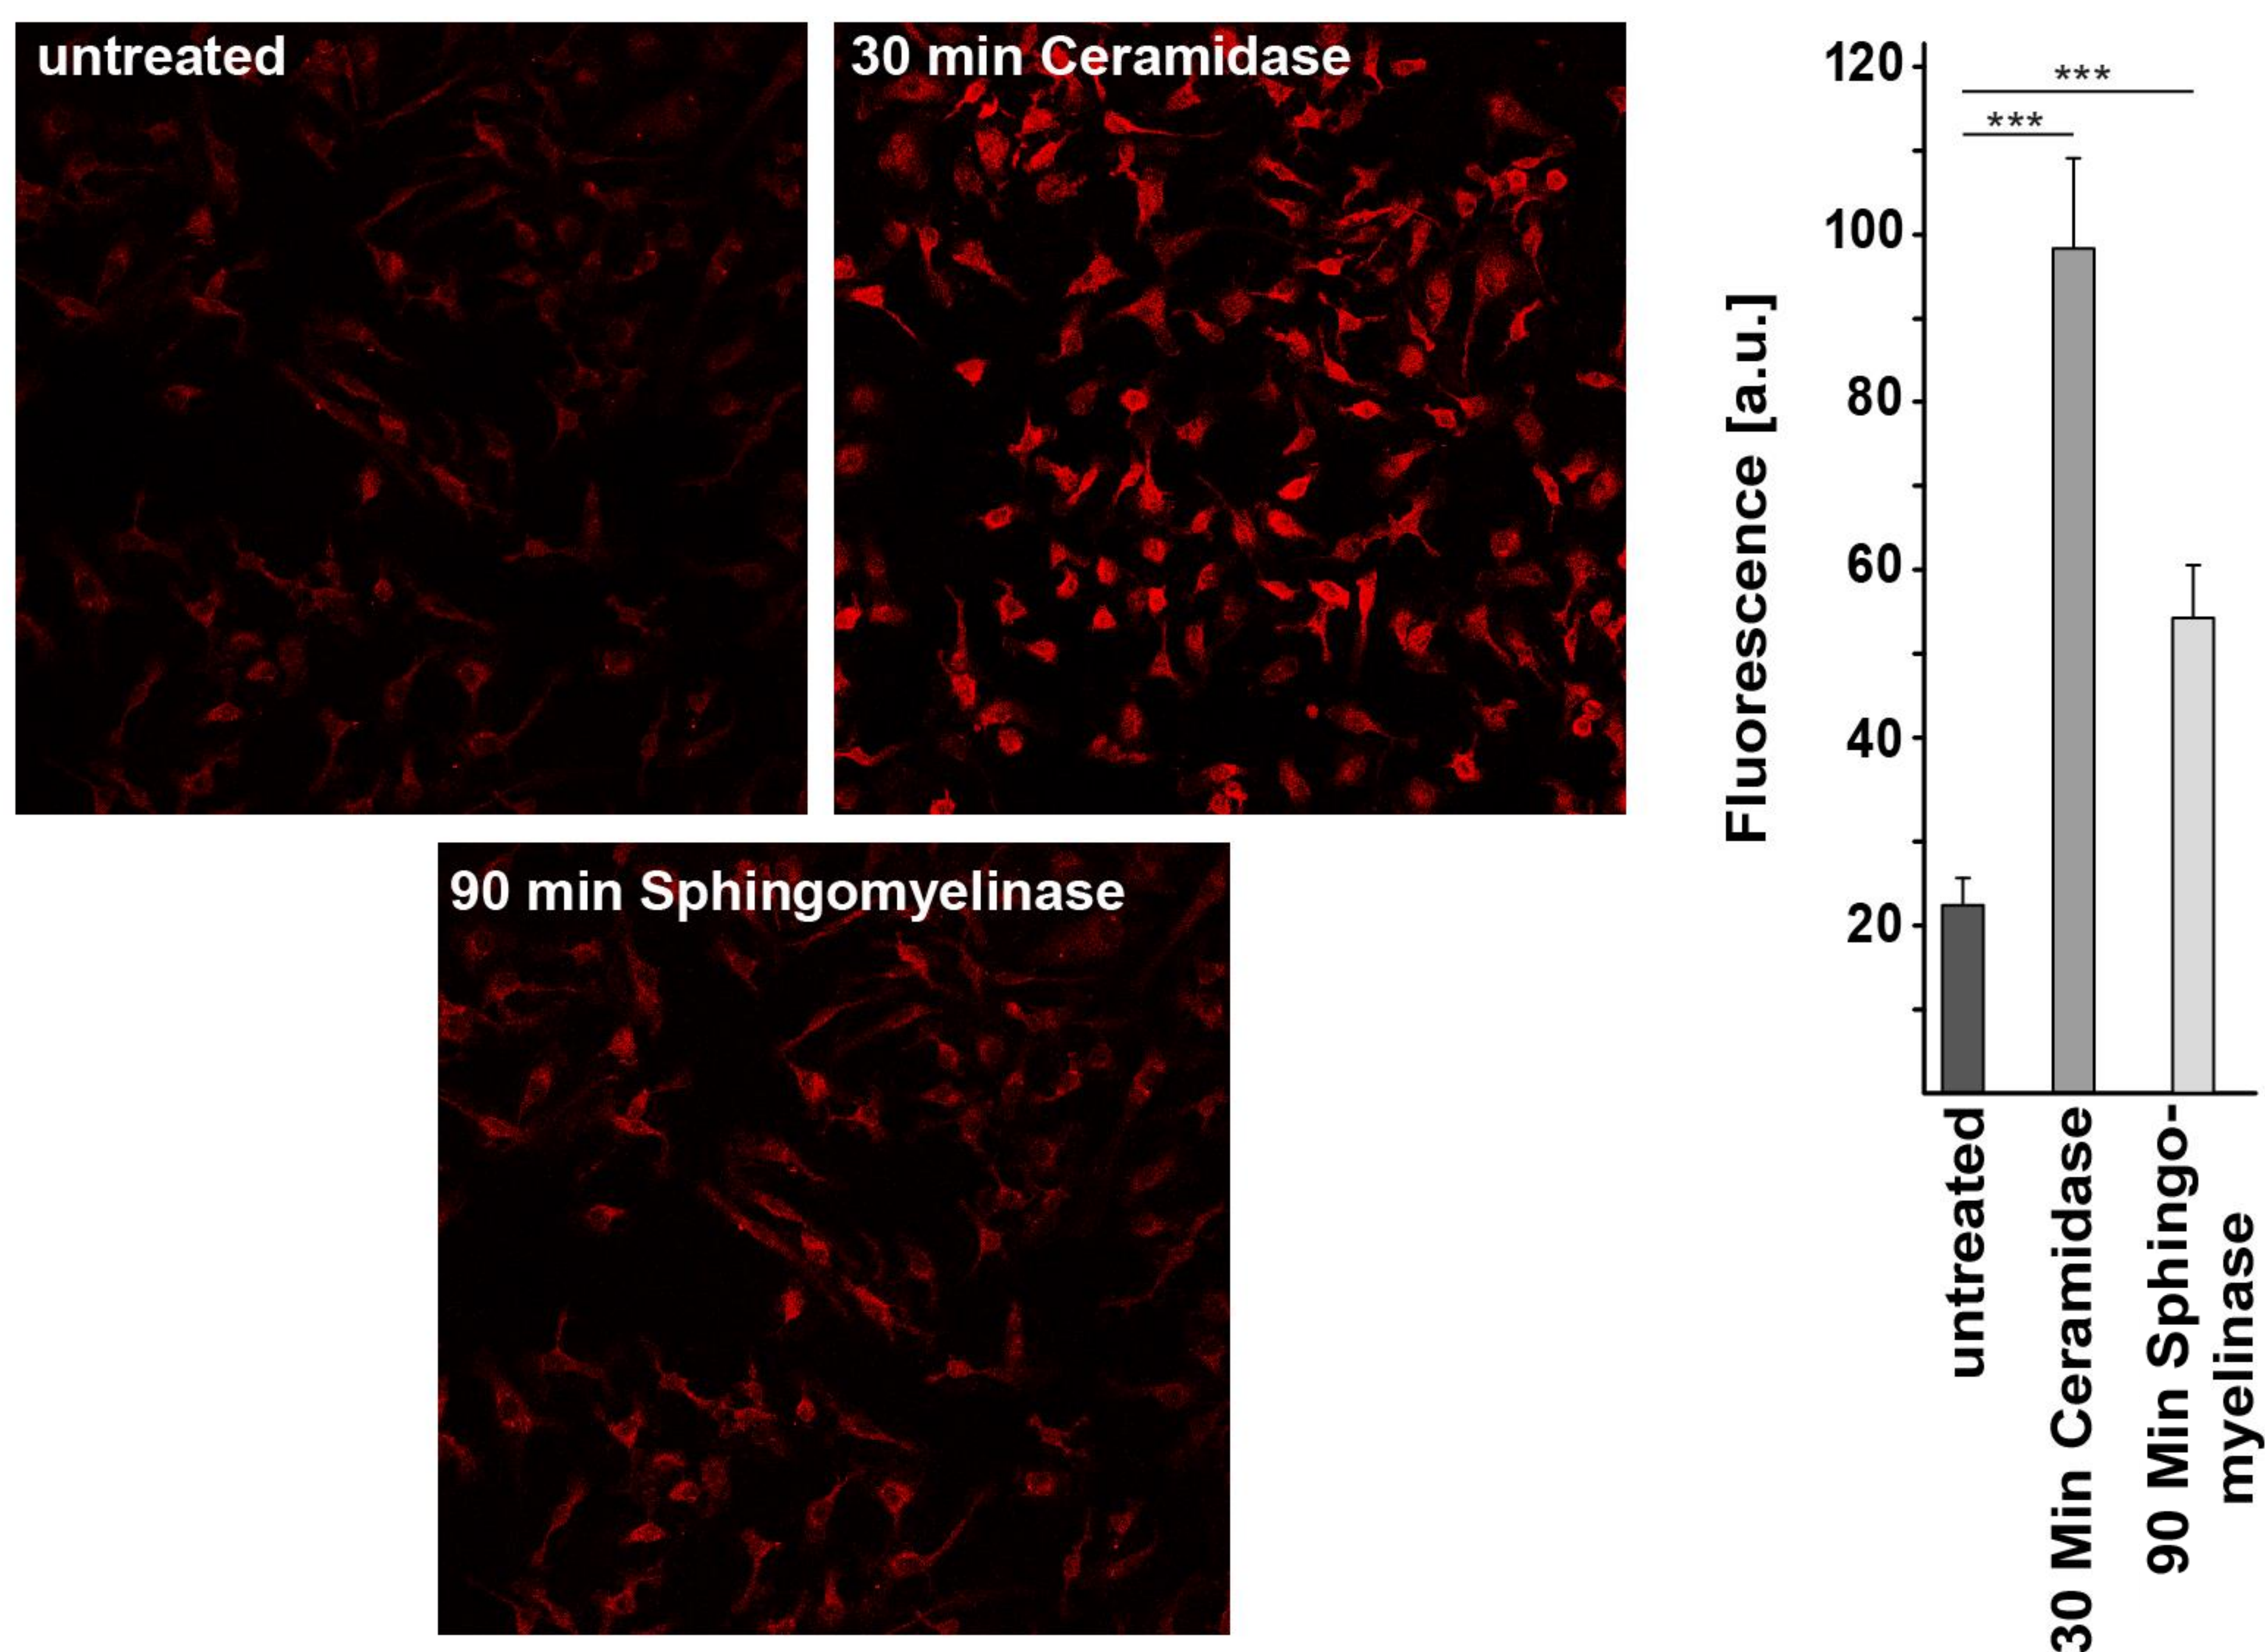

## Supplementary Figure 4: Mass spectrometric analysis and immunofluorescence microscopy of sphingolipids after treatments in different cell lines

**a:** Mass spectrometric analysis of sphingolipids in Raw264.7 cells ( $n = 6-12$ ) and bone marrow derived macrophages (BMDMs;  $n = 4$ ) that were incubated for 30 minutes with 250  $\mu\text{M}$  D-erythro-sphingosine (Sph), 100  $\mu\text{M}$  of sphingosine kinase inhibitor (SKI), 250 U/L ceramidase (CDase) or 6.5 U/ml sphingomyelinase (SMase) and analyzed after 24 h (Raw264.7 cells, one-way Anova [Dunnett's /Kruskal-Wallis multiple comparison]) or 6h (BMDMs, one-way Anova [Dunnett's multiple comparison]). **(b)** BMDMs were treated for 30 minutes with 0.3  $\mu\text{g}$  ceramidase, 90 minutes with 1.56 U / 250 $\mu\text{L}$  sphingomyelinase or left untreated ( $n = 3$ , one-way Anova [Tukey's multiple comparison]). All data are shown as mean  $\pm$  SD. \* equals  $p \leq 0.05$ , \*\* equals  $p \leq 0.01$ , # equals  $p \leq 0.001$ , ## equals  $p \leq 0.0001$ .

# Supplementary Figure 5

**a**

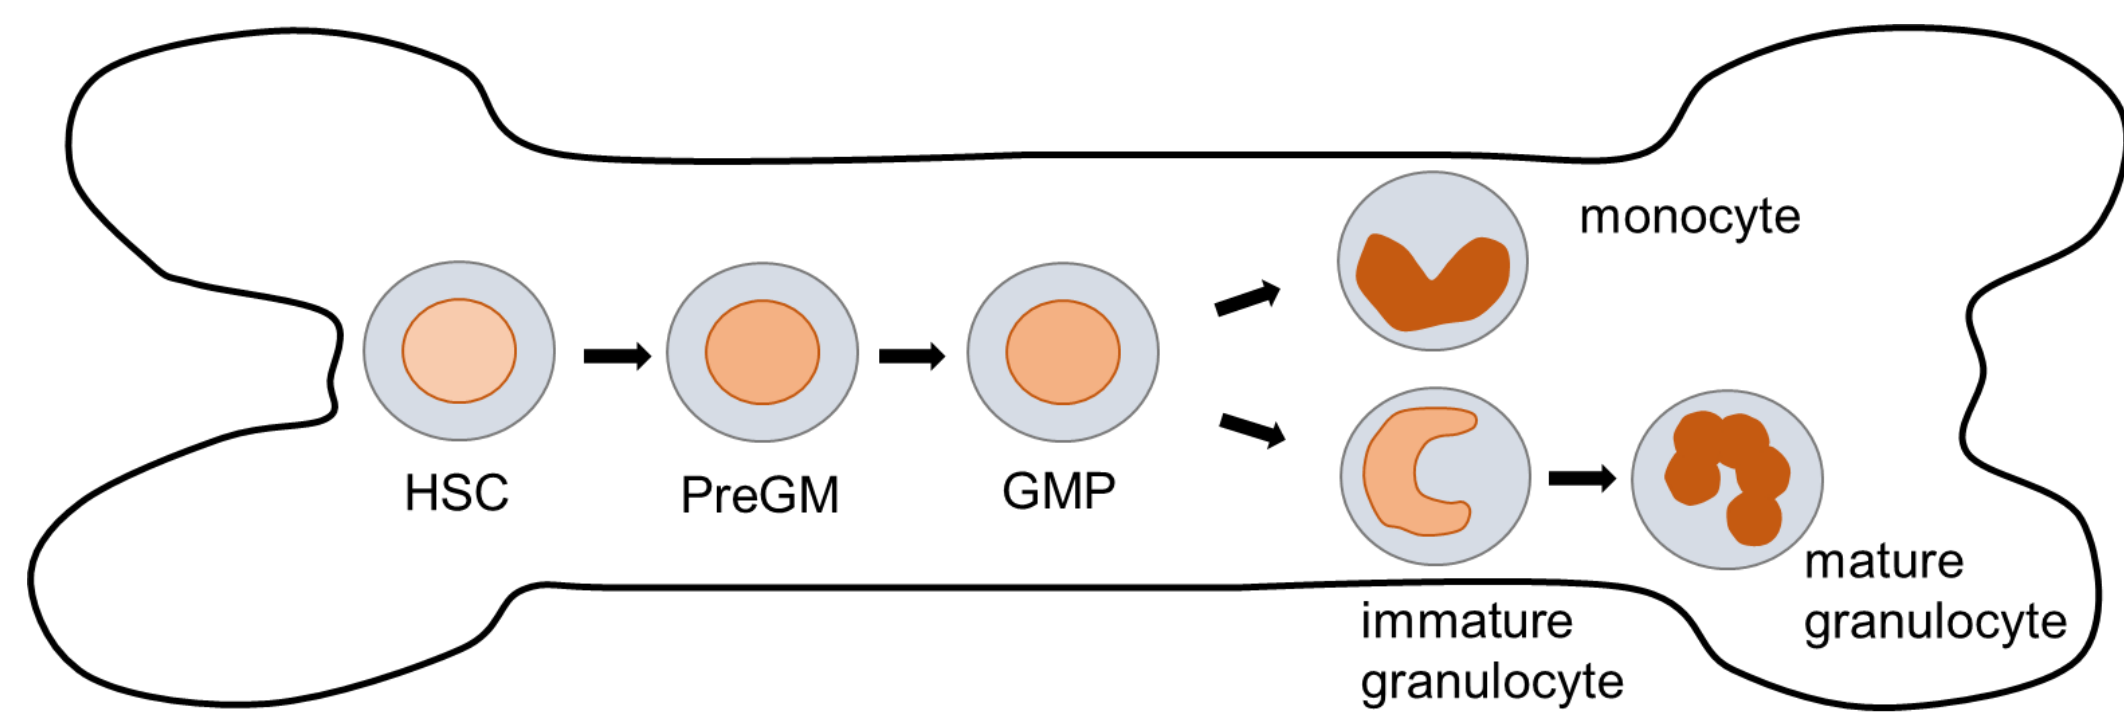

**PreGM**

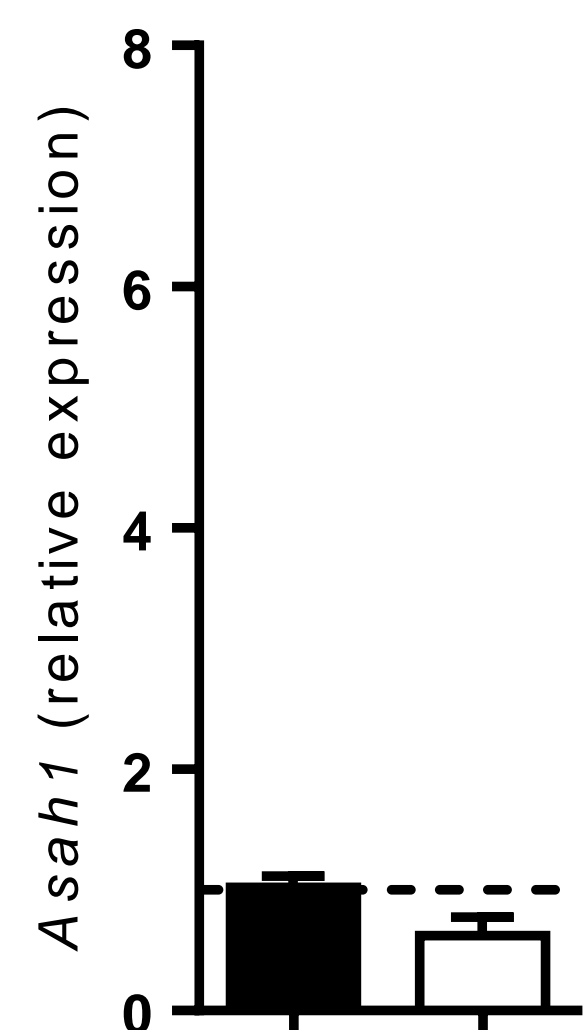

**GMP**

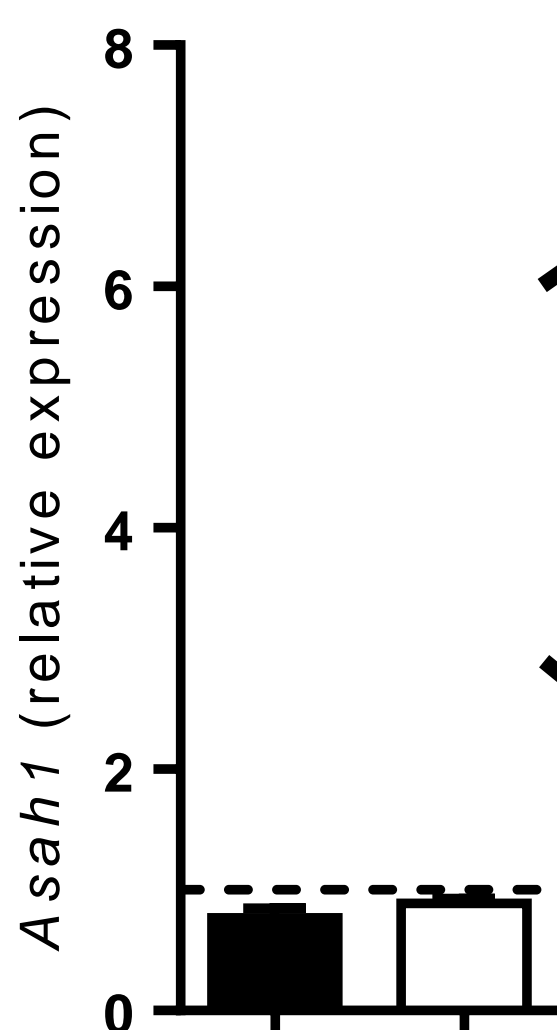

**Monocytes**

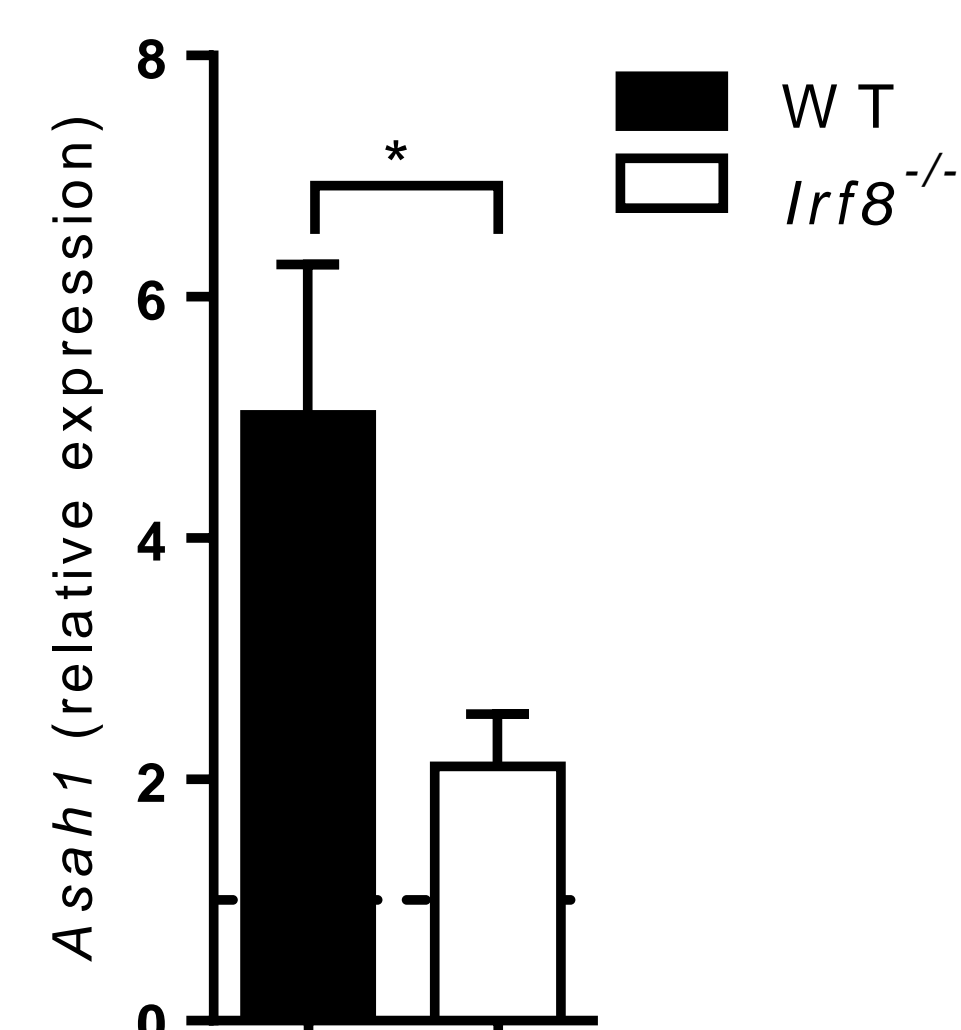

**Immature Granulocytes**

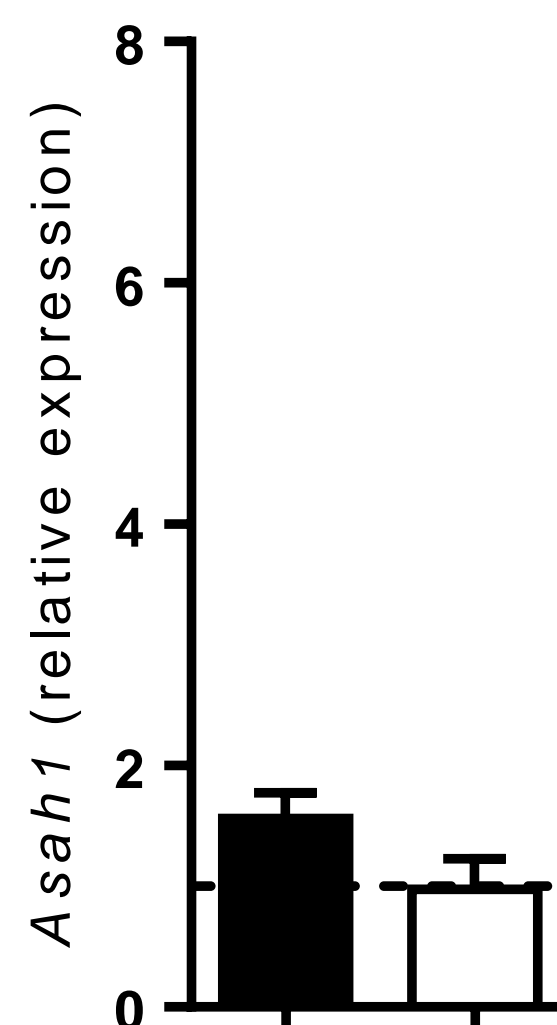

**Mature Granulocytes**

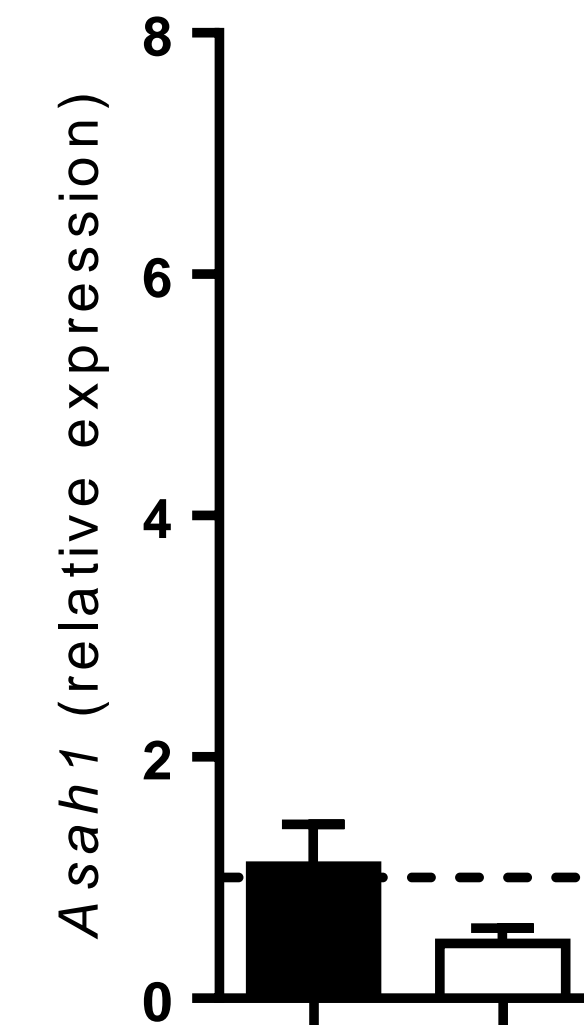

**b**

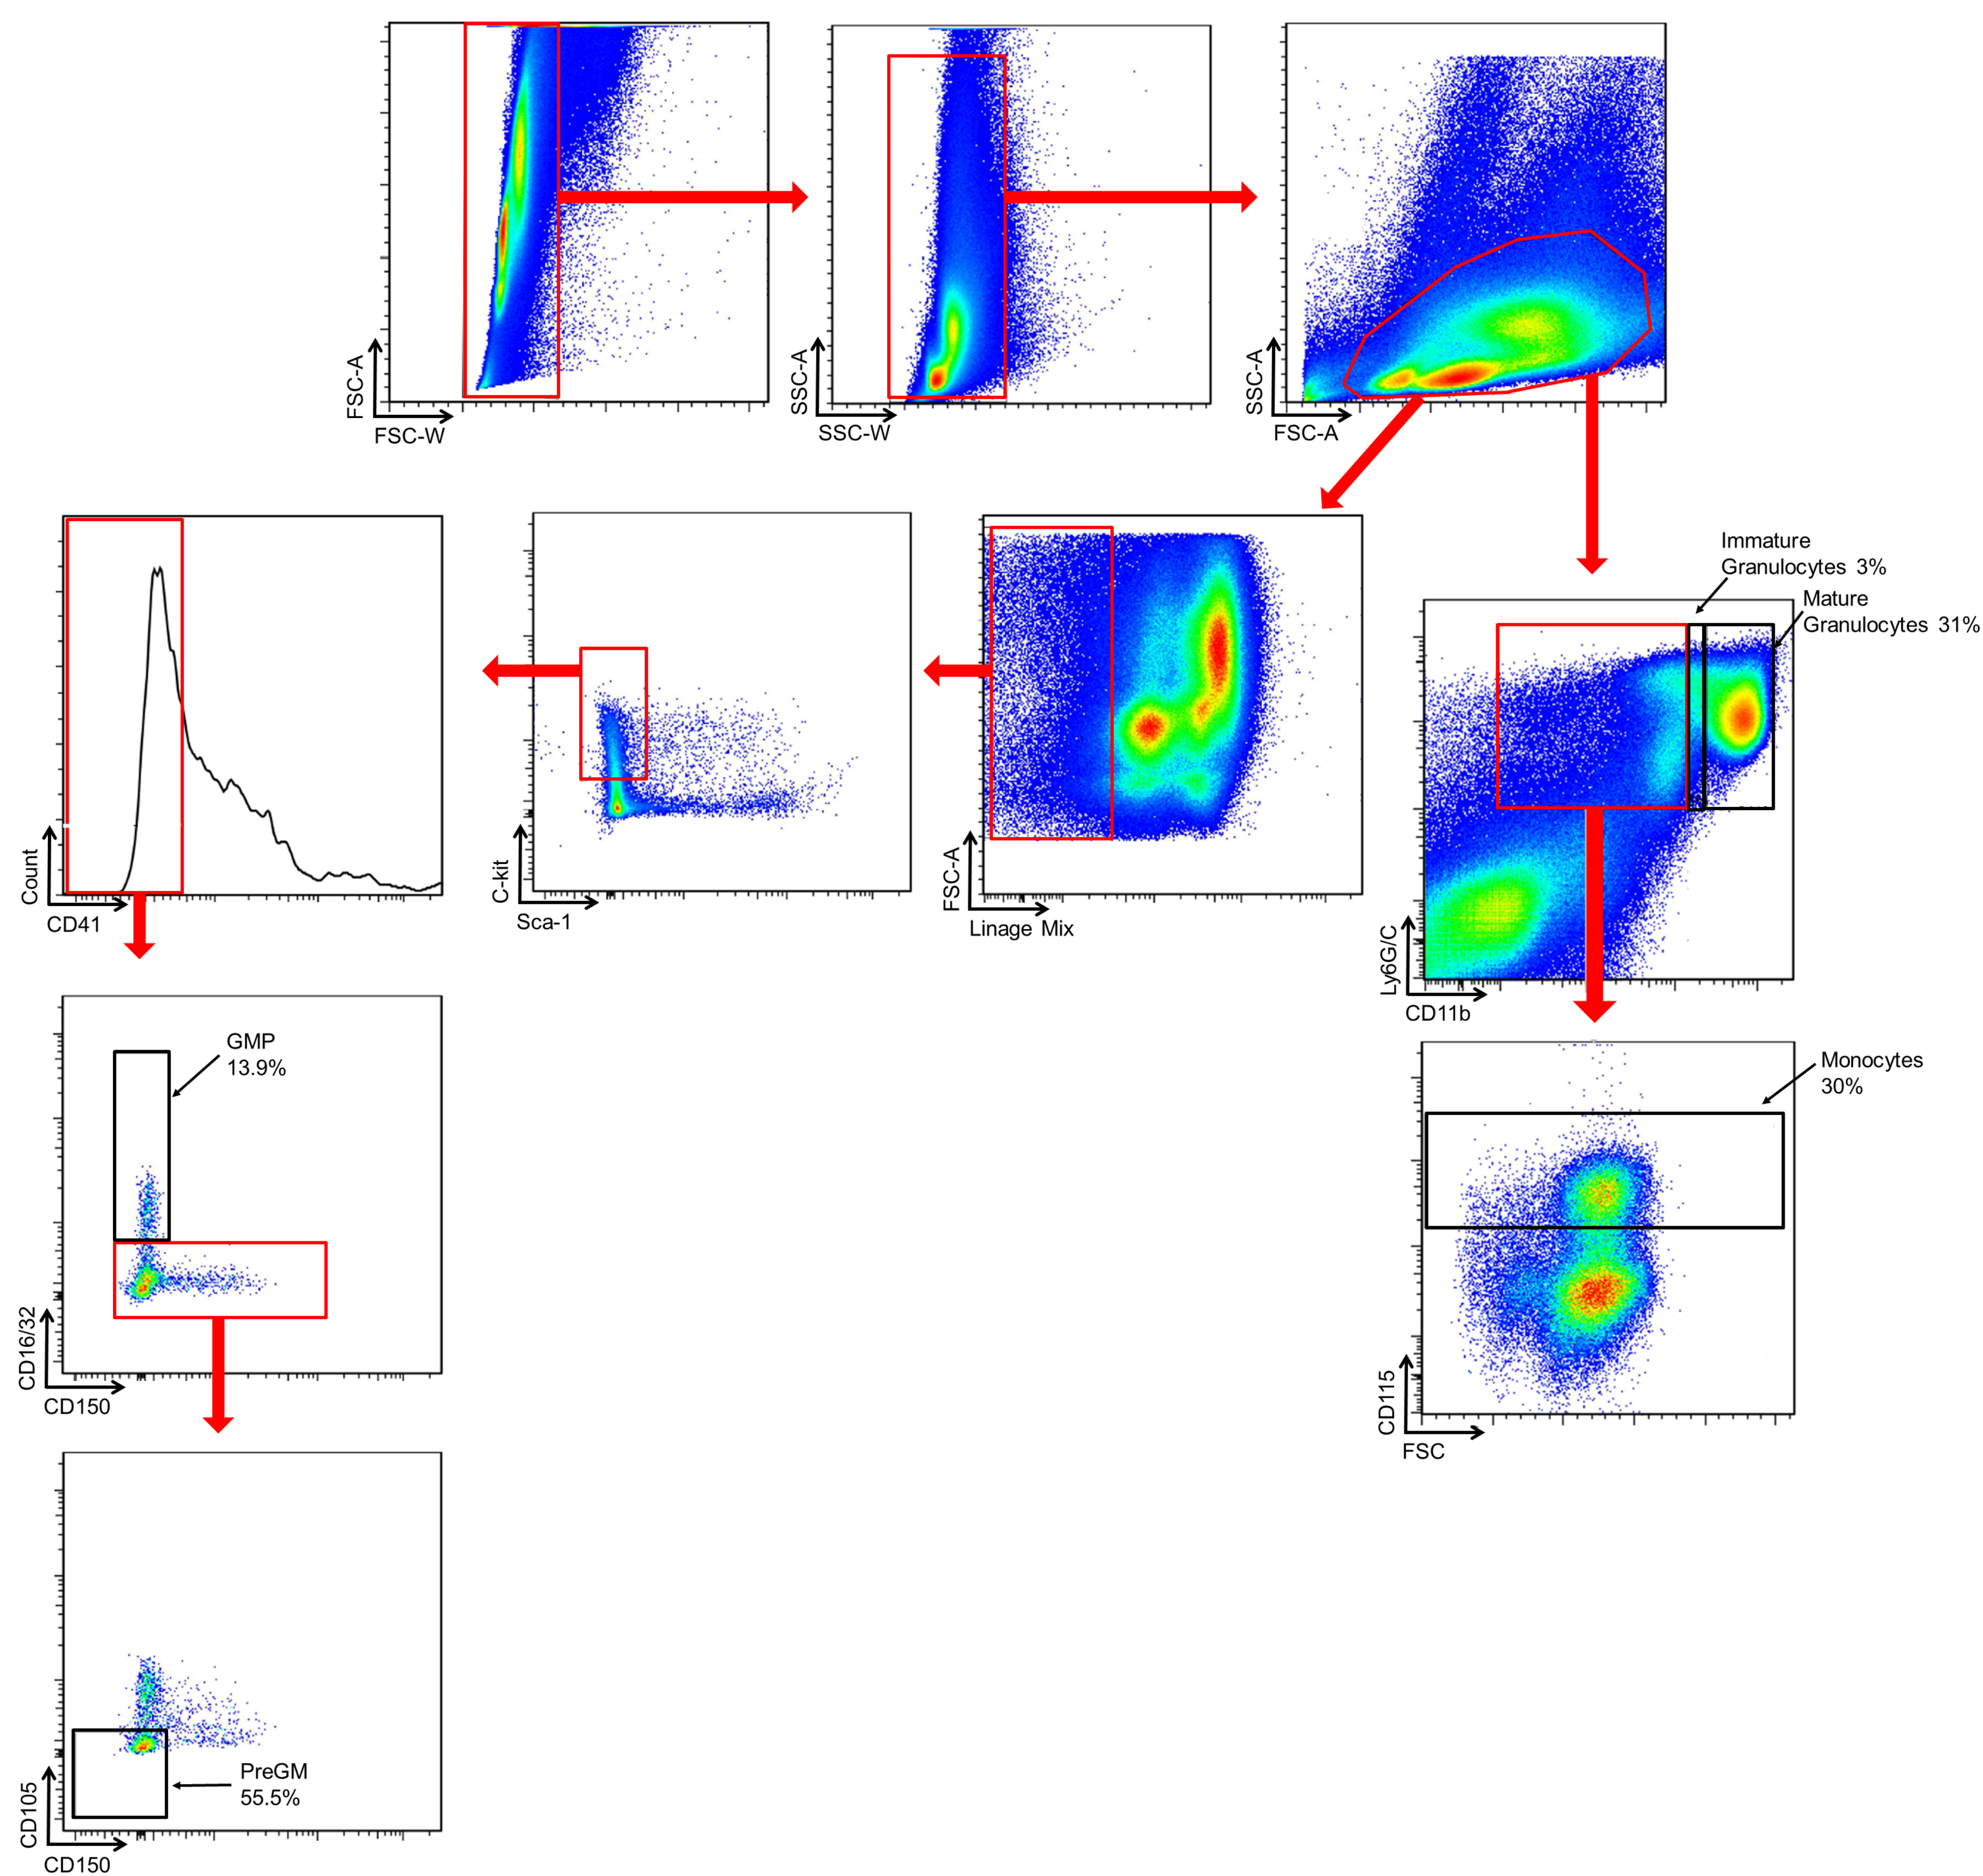

## Supplementary Figure 5: Expression of *Asah1* in macrophages during development is dependent on IRF8

**a:** Real-time polymerase chain reaction (RT-PCR) results for *Asah1* mRNA expression of monocytes, granulocytes and precursor cells from the myeloid lineage, isolated from wild-type (WT) and IRF8 deficient mice (n = 5-8; one-tailed Student's *t*-test). **b:** Gating strategy for cell sorting. All data are shown as mean +/- SEM. \* equals  $p \leq 0.05$ , \*\* equals  $p \leq 0.01$ , # equals  $p \leq 0.001$ , ## equals  $p \leq 0.0001$ .

# Supplementary Figure 6

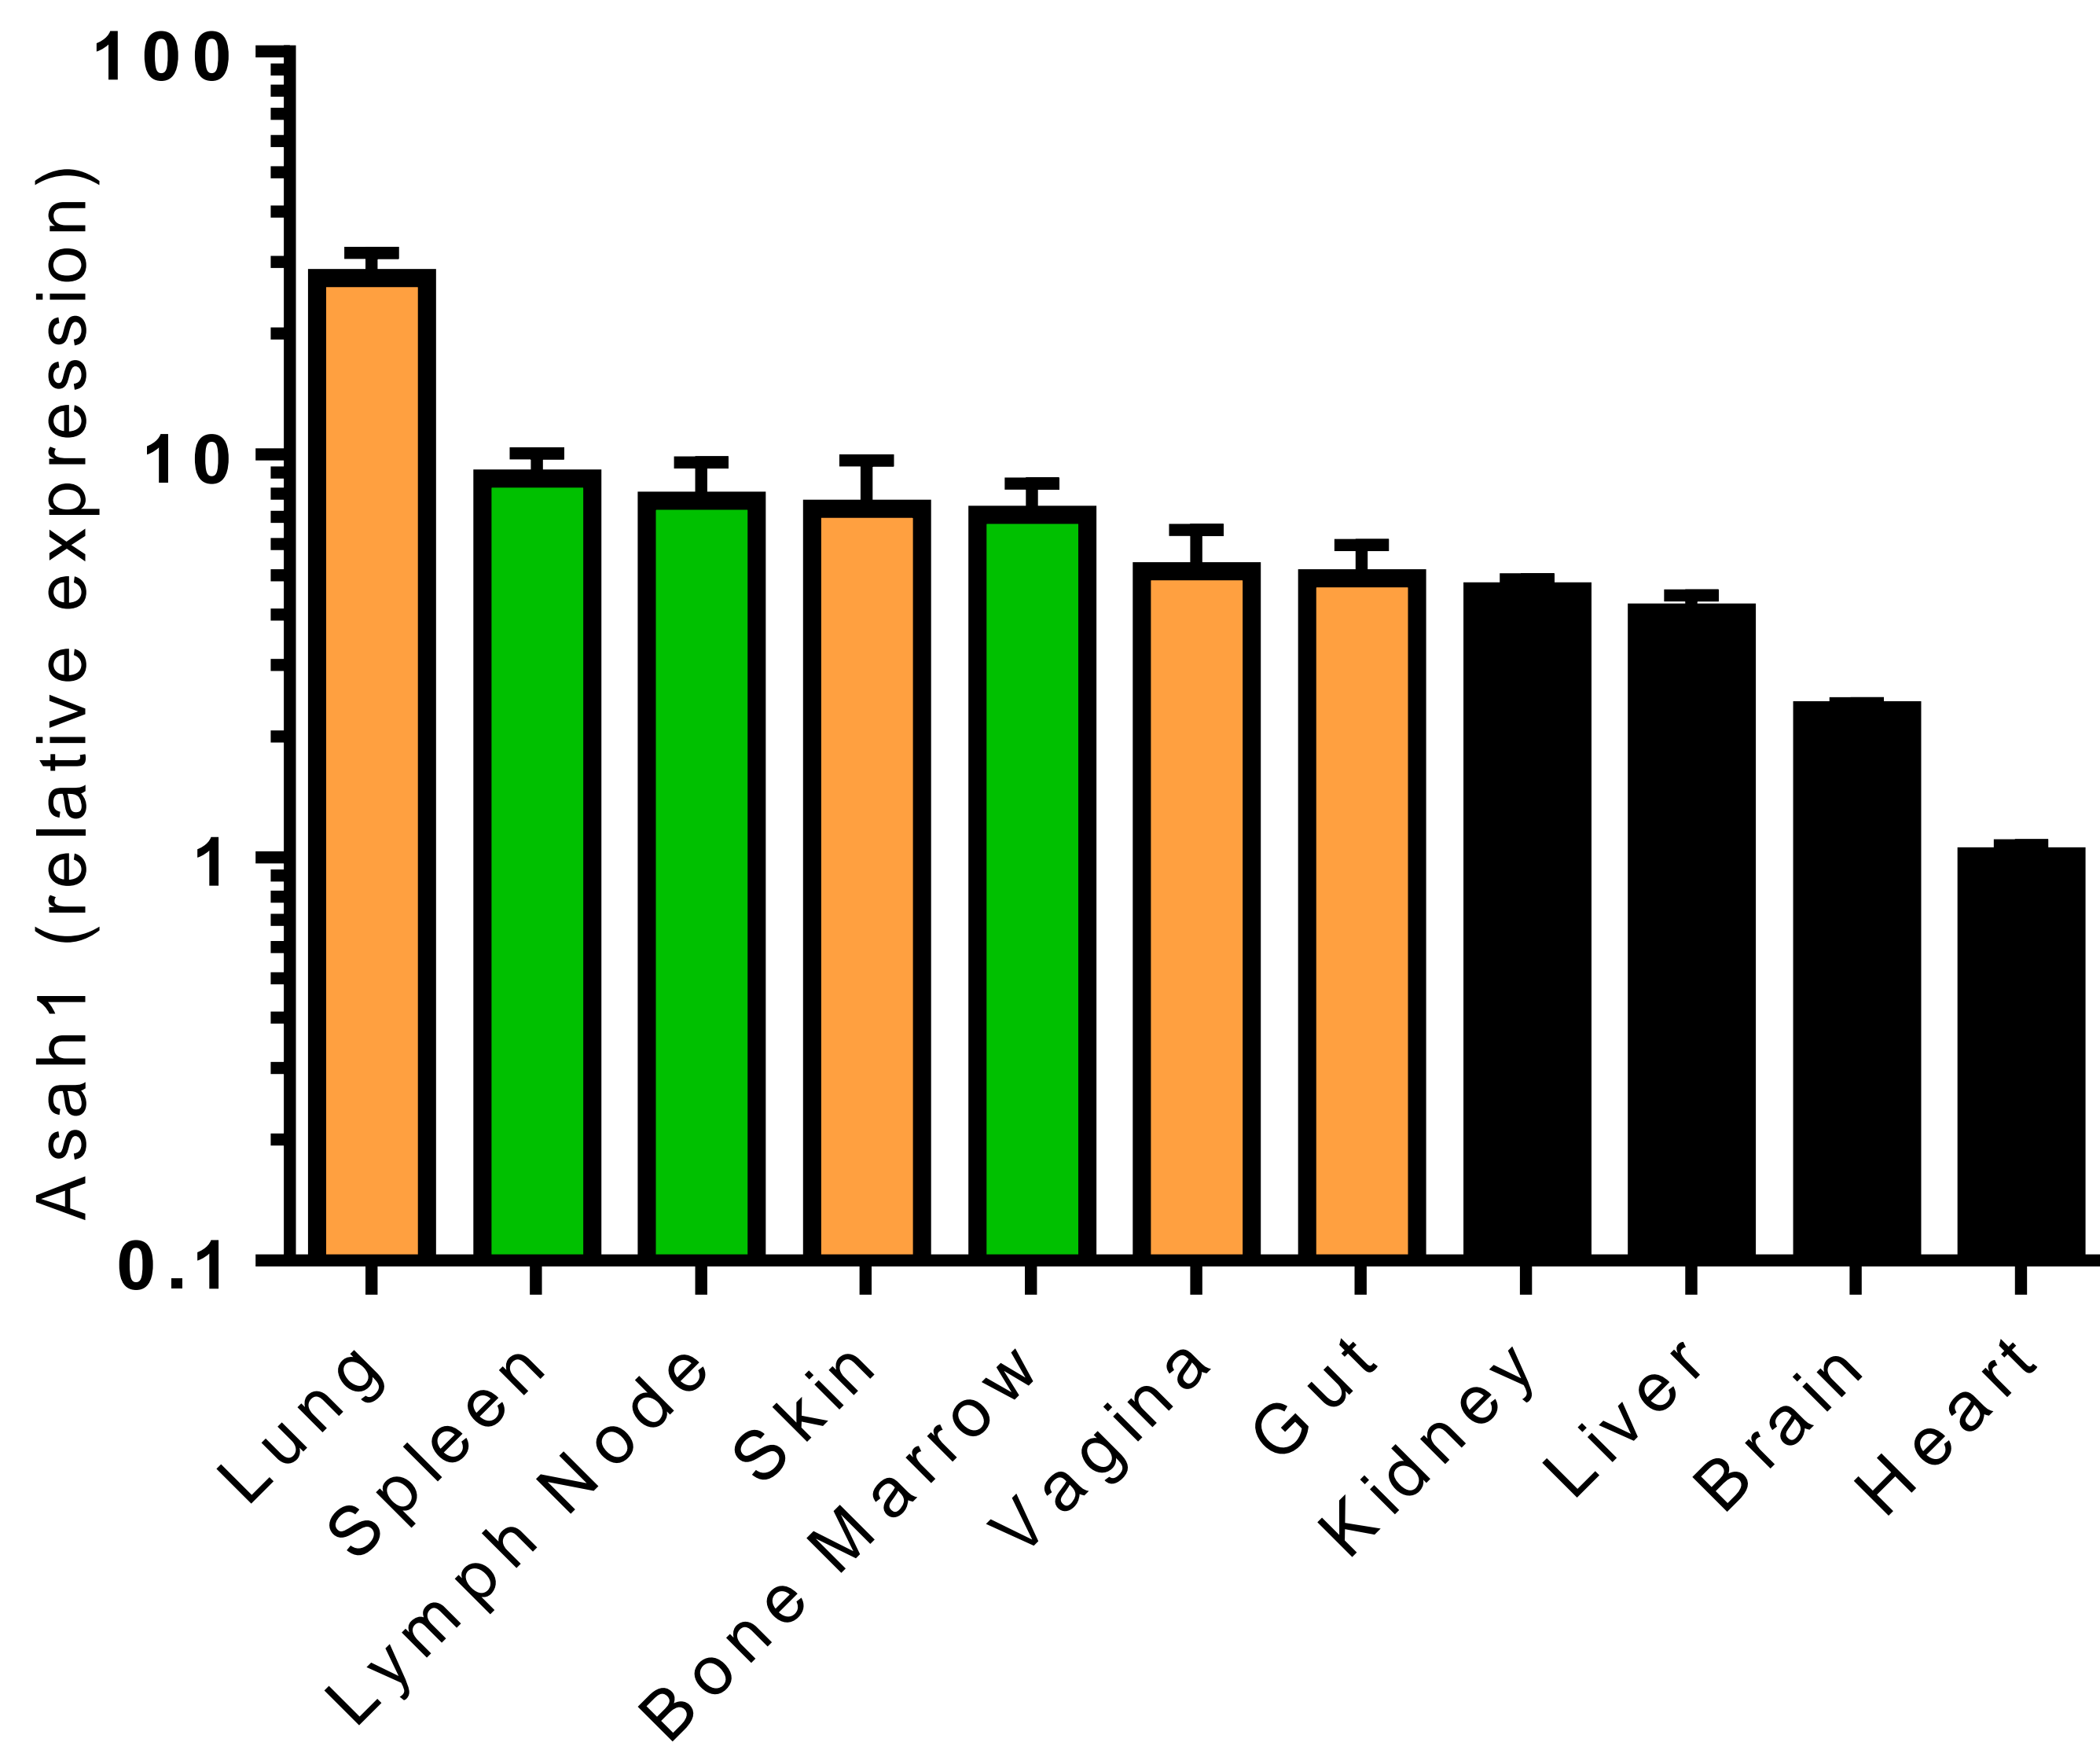

## Supplementary Figure 6: *Asah1* expression in different tissues

Real-time polymerase chain reaction (RT-PCR) for *Asah1* of the indicated organs, relative to heart, derived from naïve C57BL/6 mice (n = 4-5). All data are shown as mean  $\pm$  SEM.

# Supplementary Figure 7

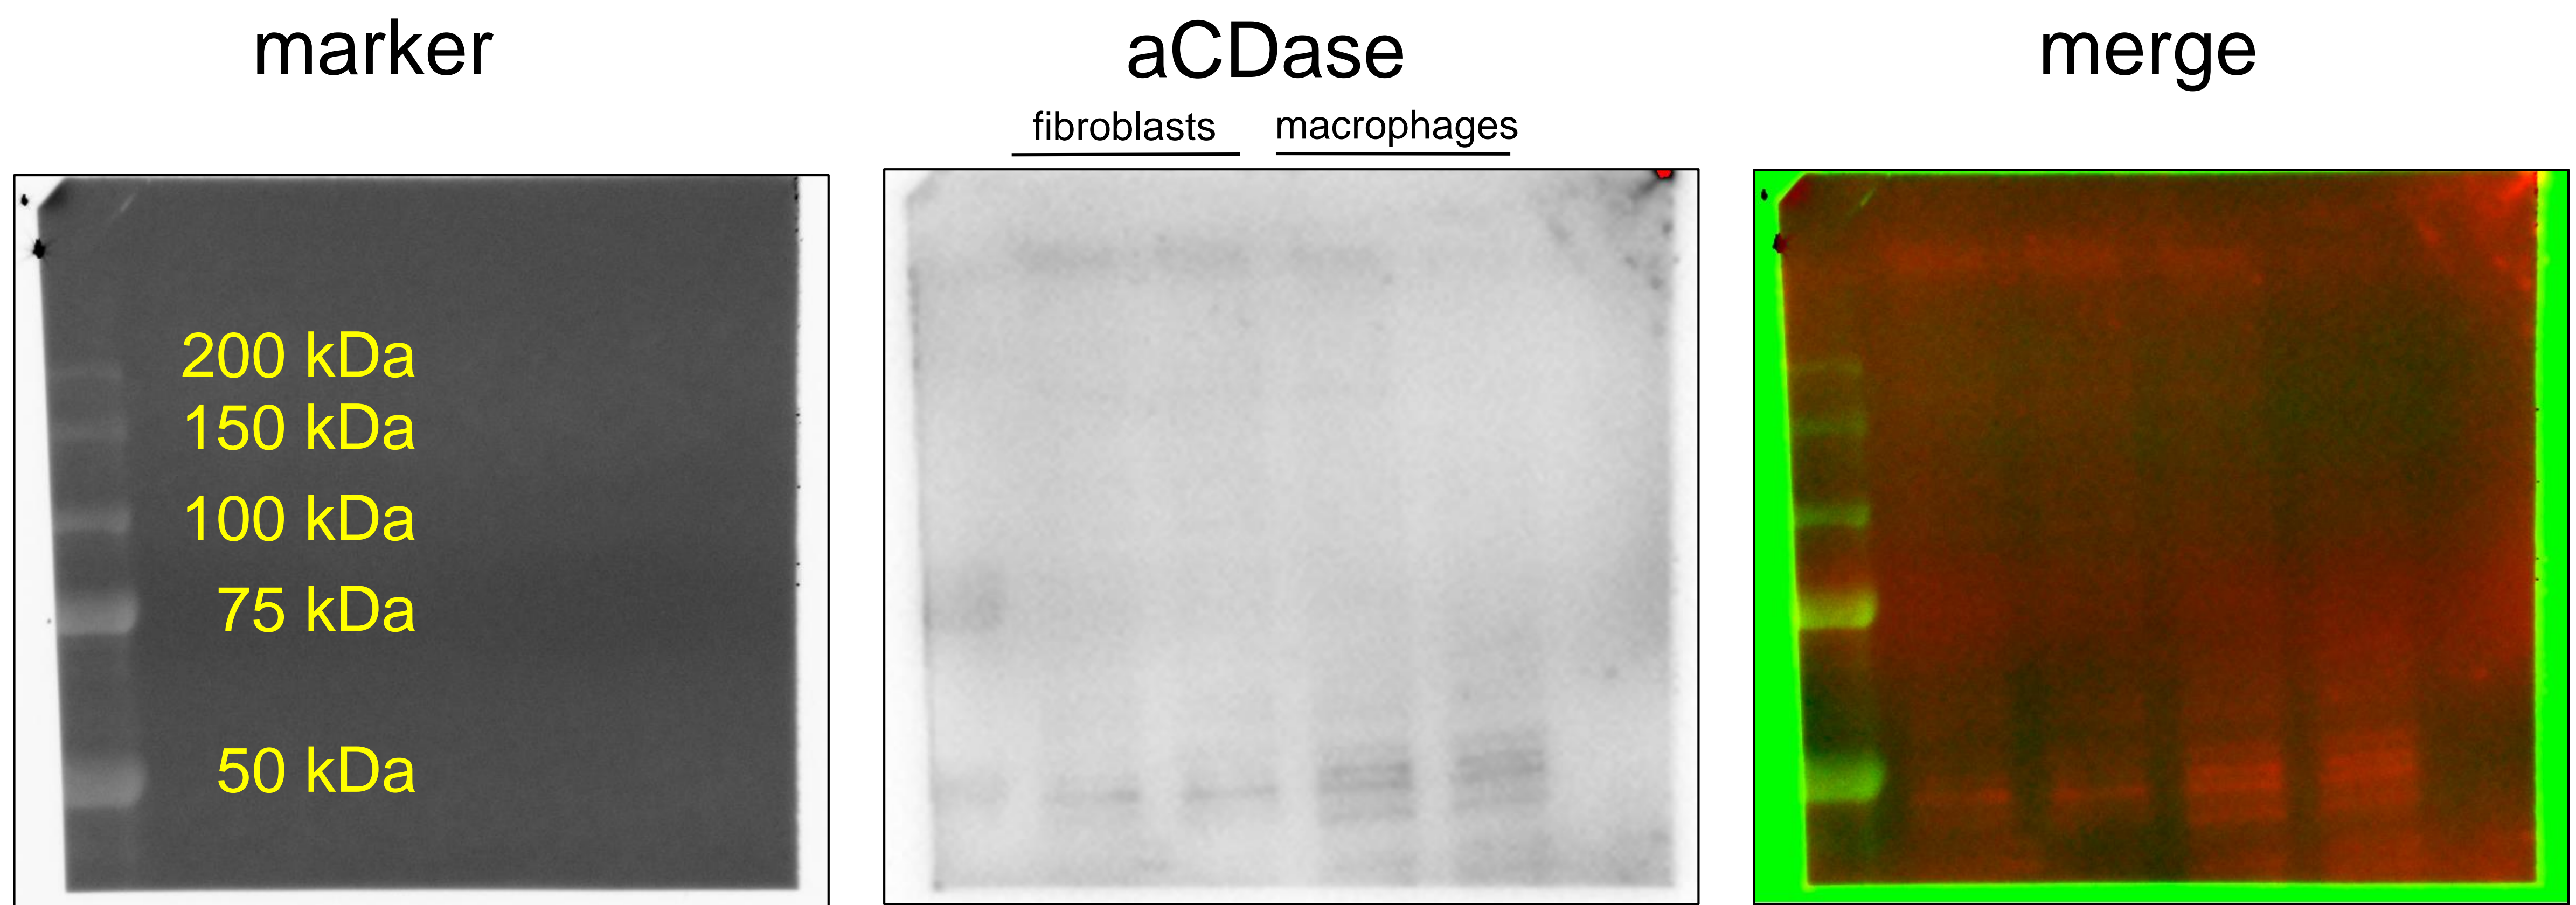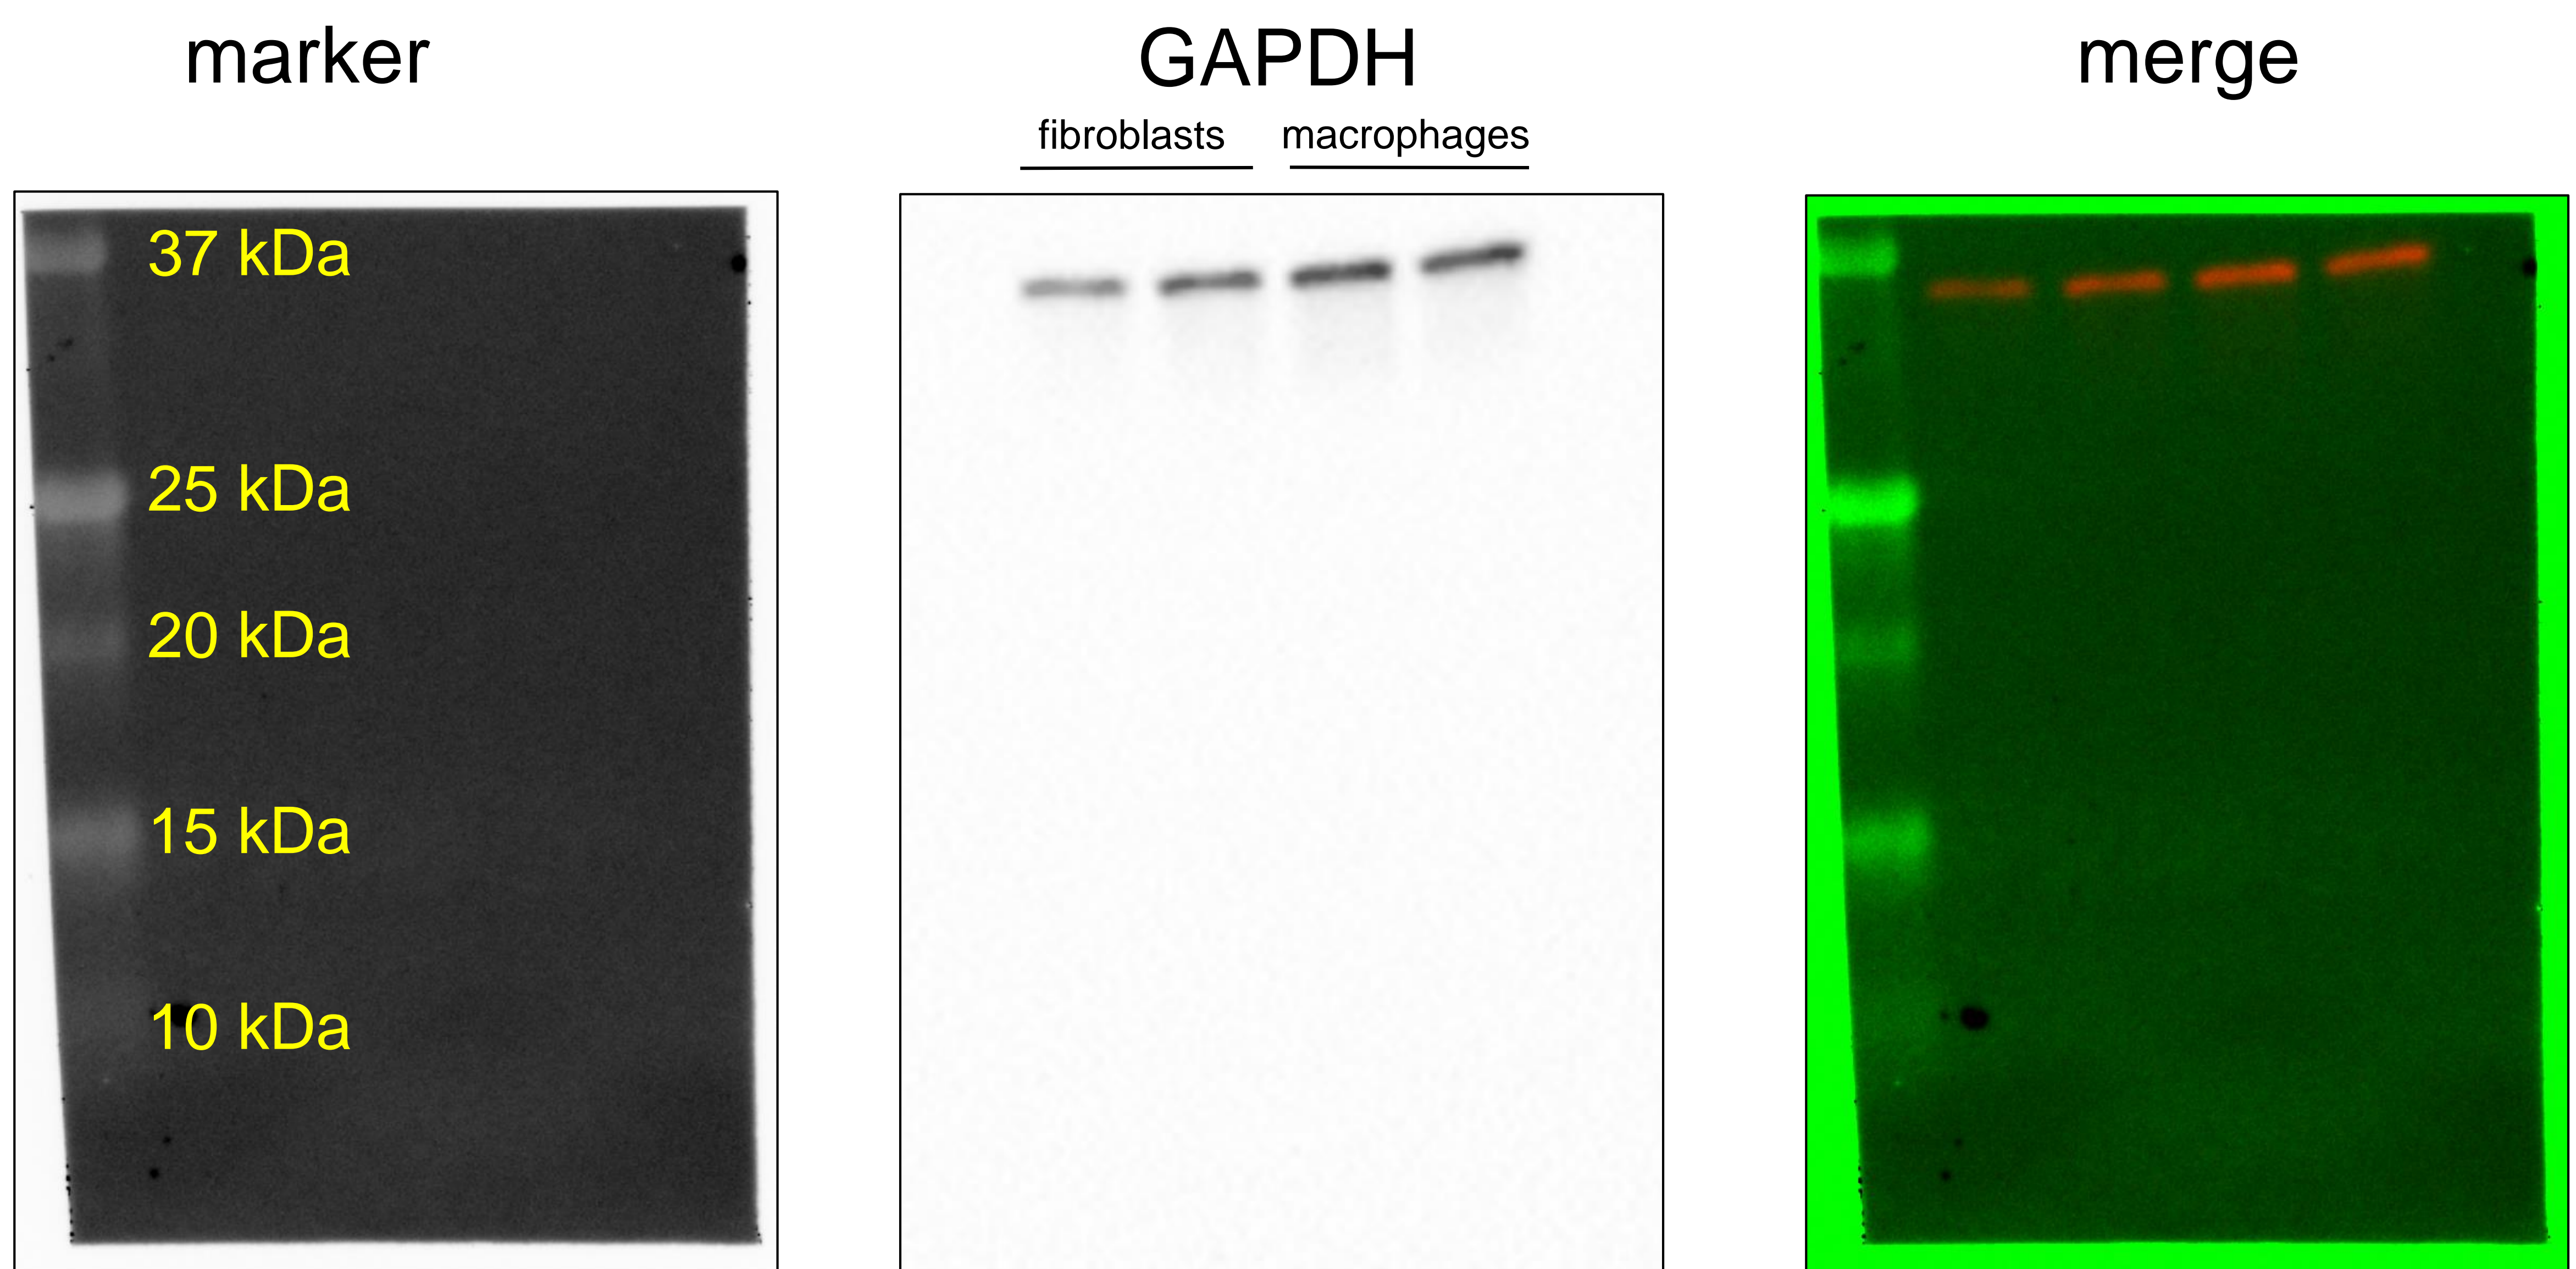

Supplementary Figure 7: Uncropped Western blots as shown in Figure 2h.

# Supplementary Figure 8

marker

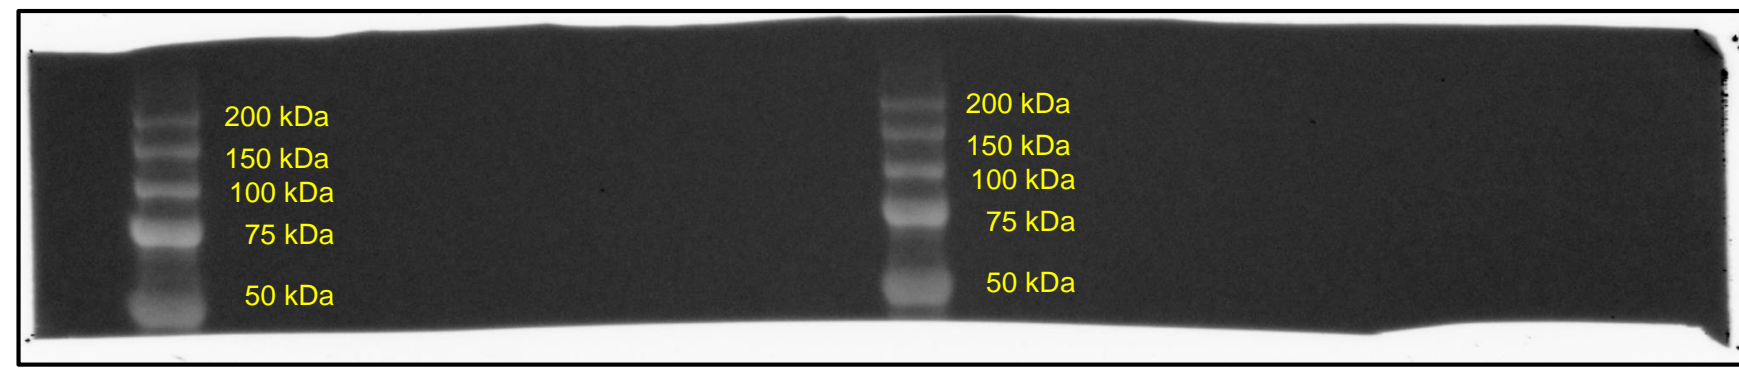

aCDase

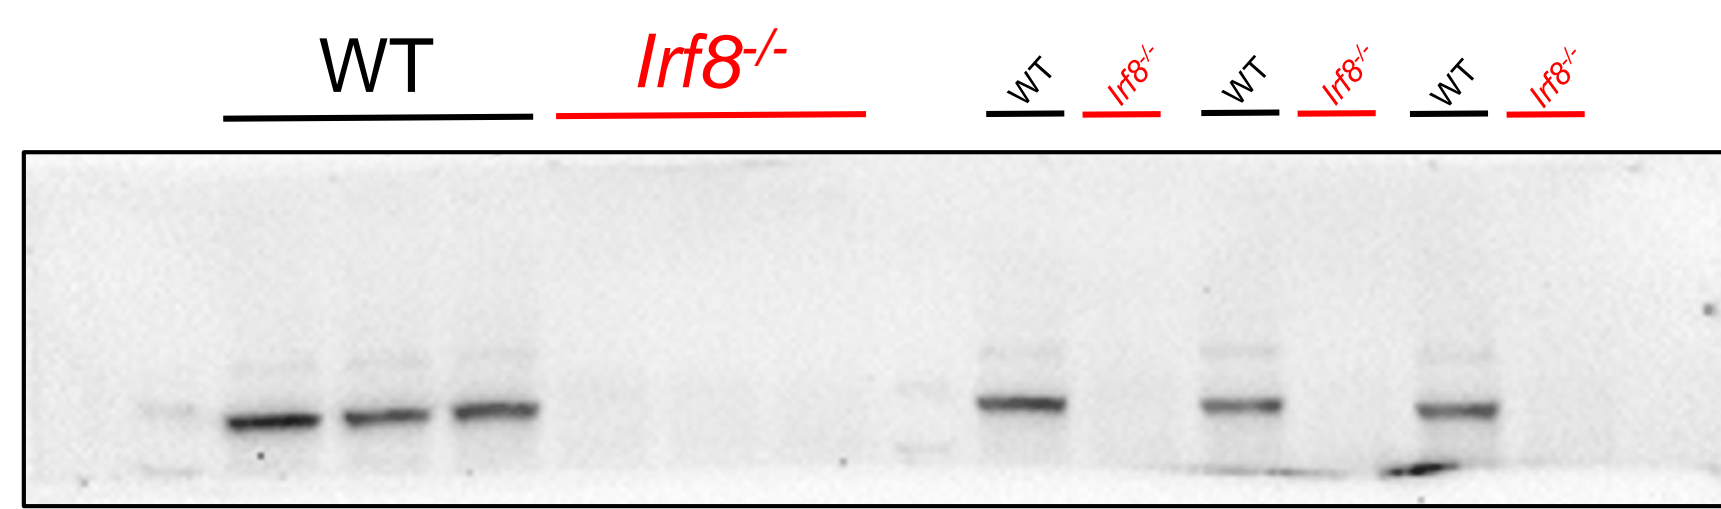

merge

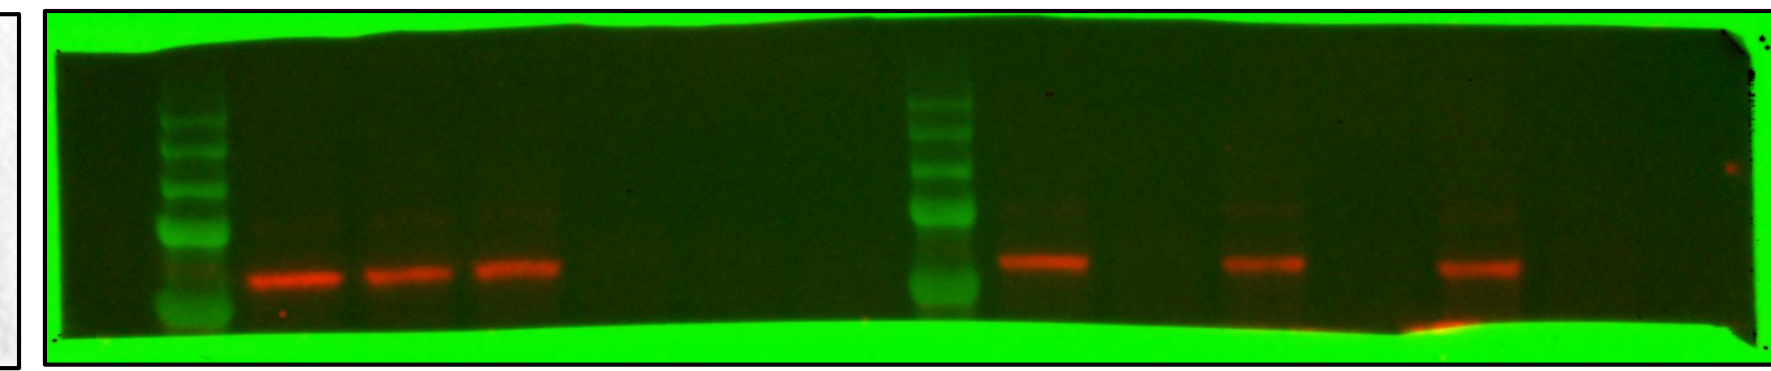

marker

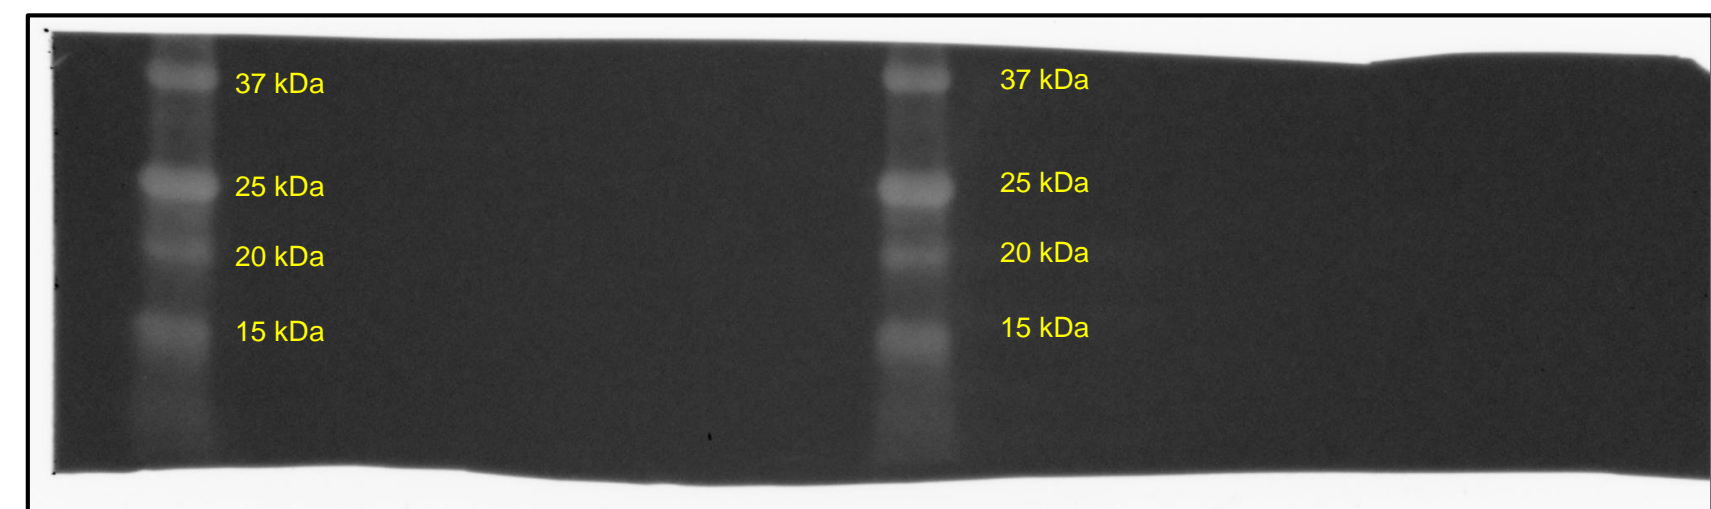

GAPDH

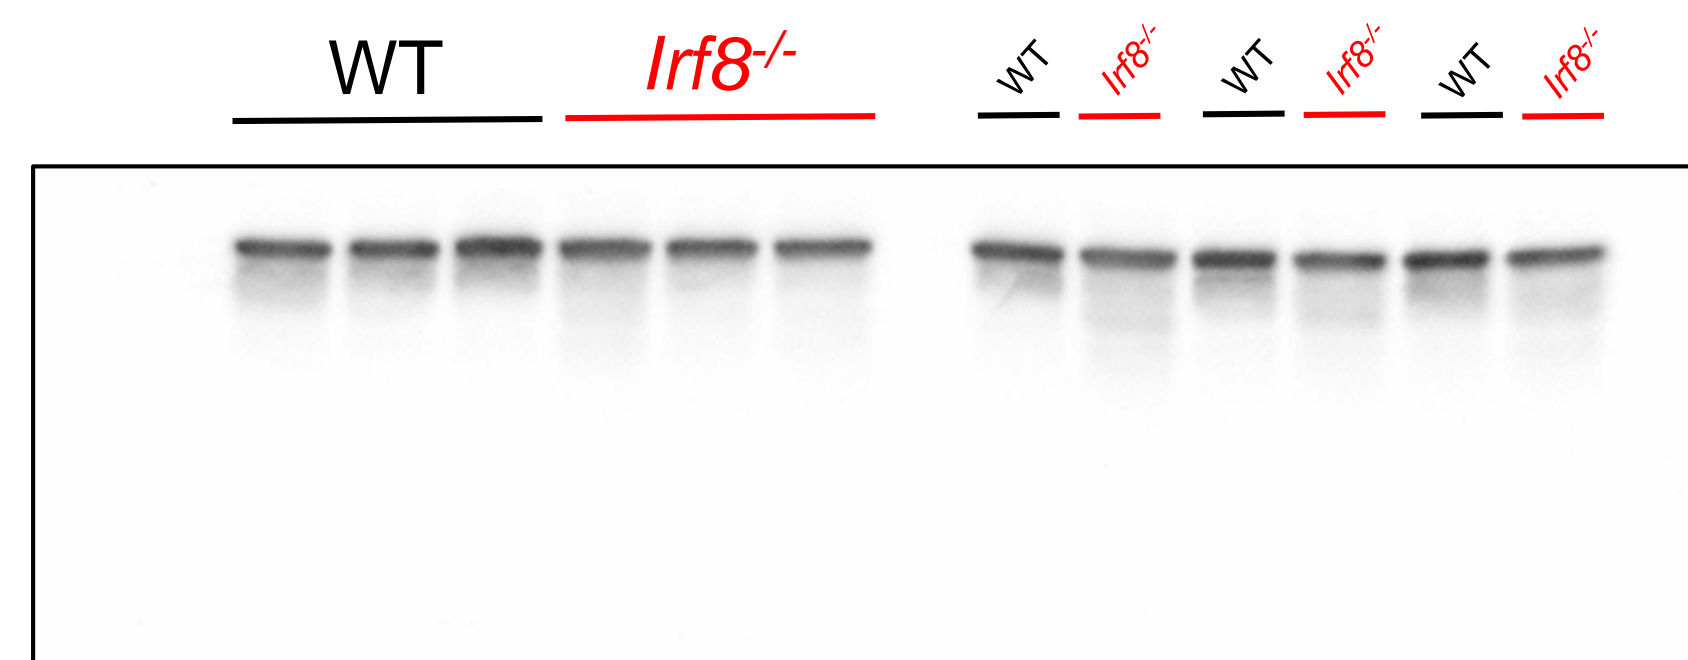

merge

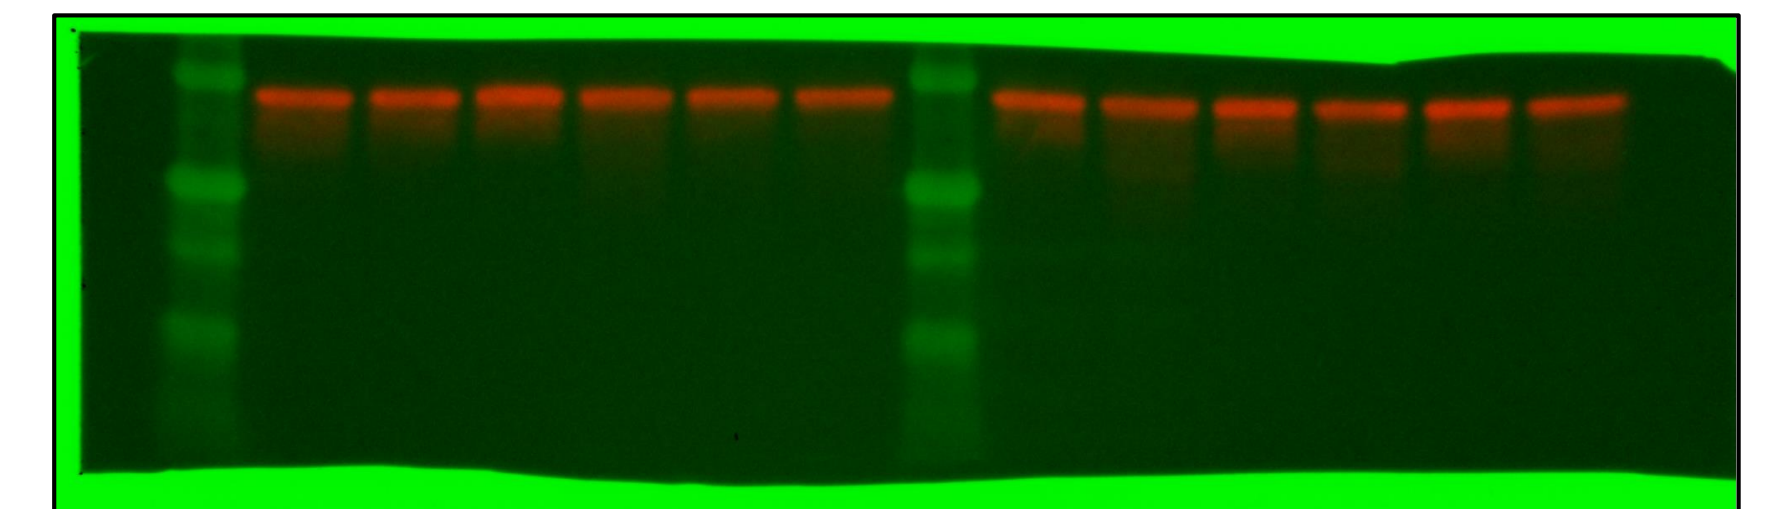

# Supplementary Figure 9

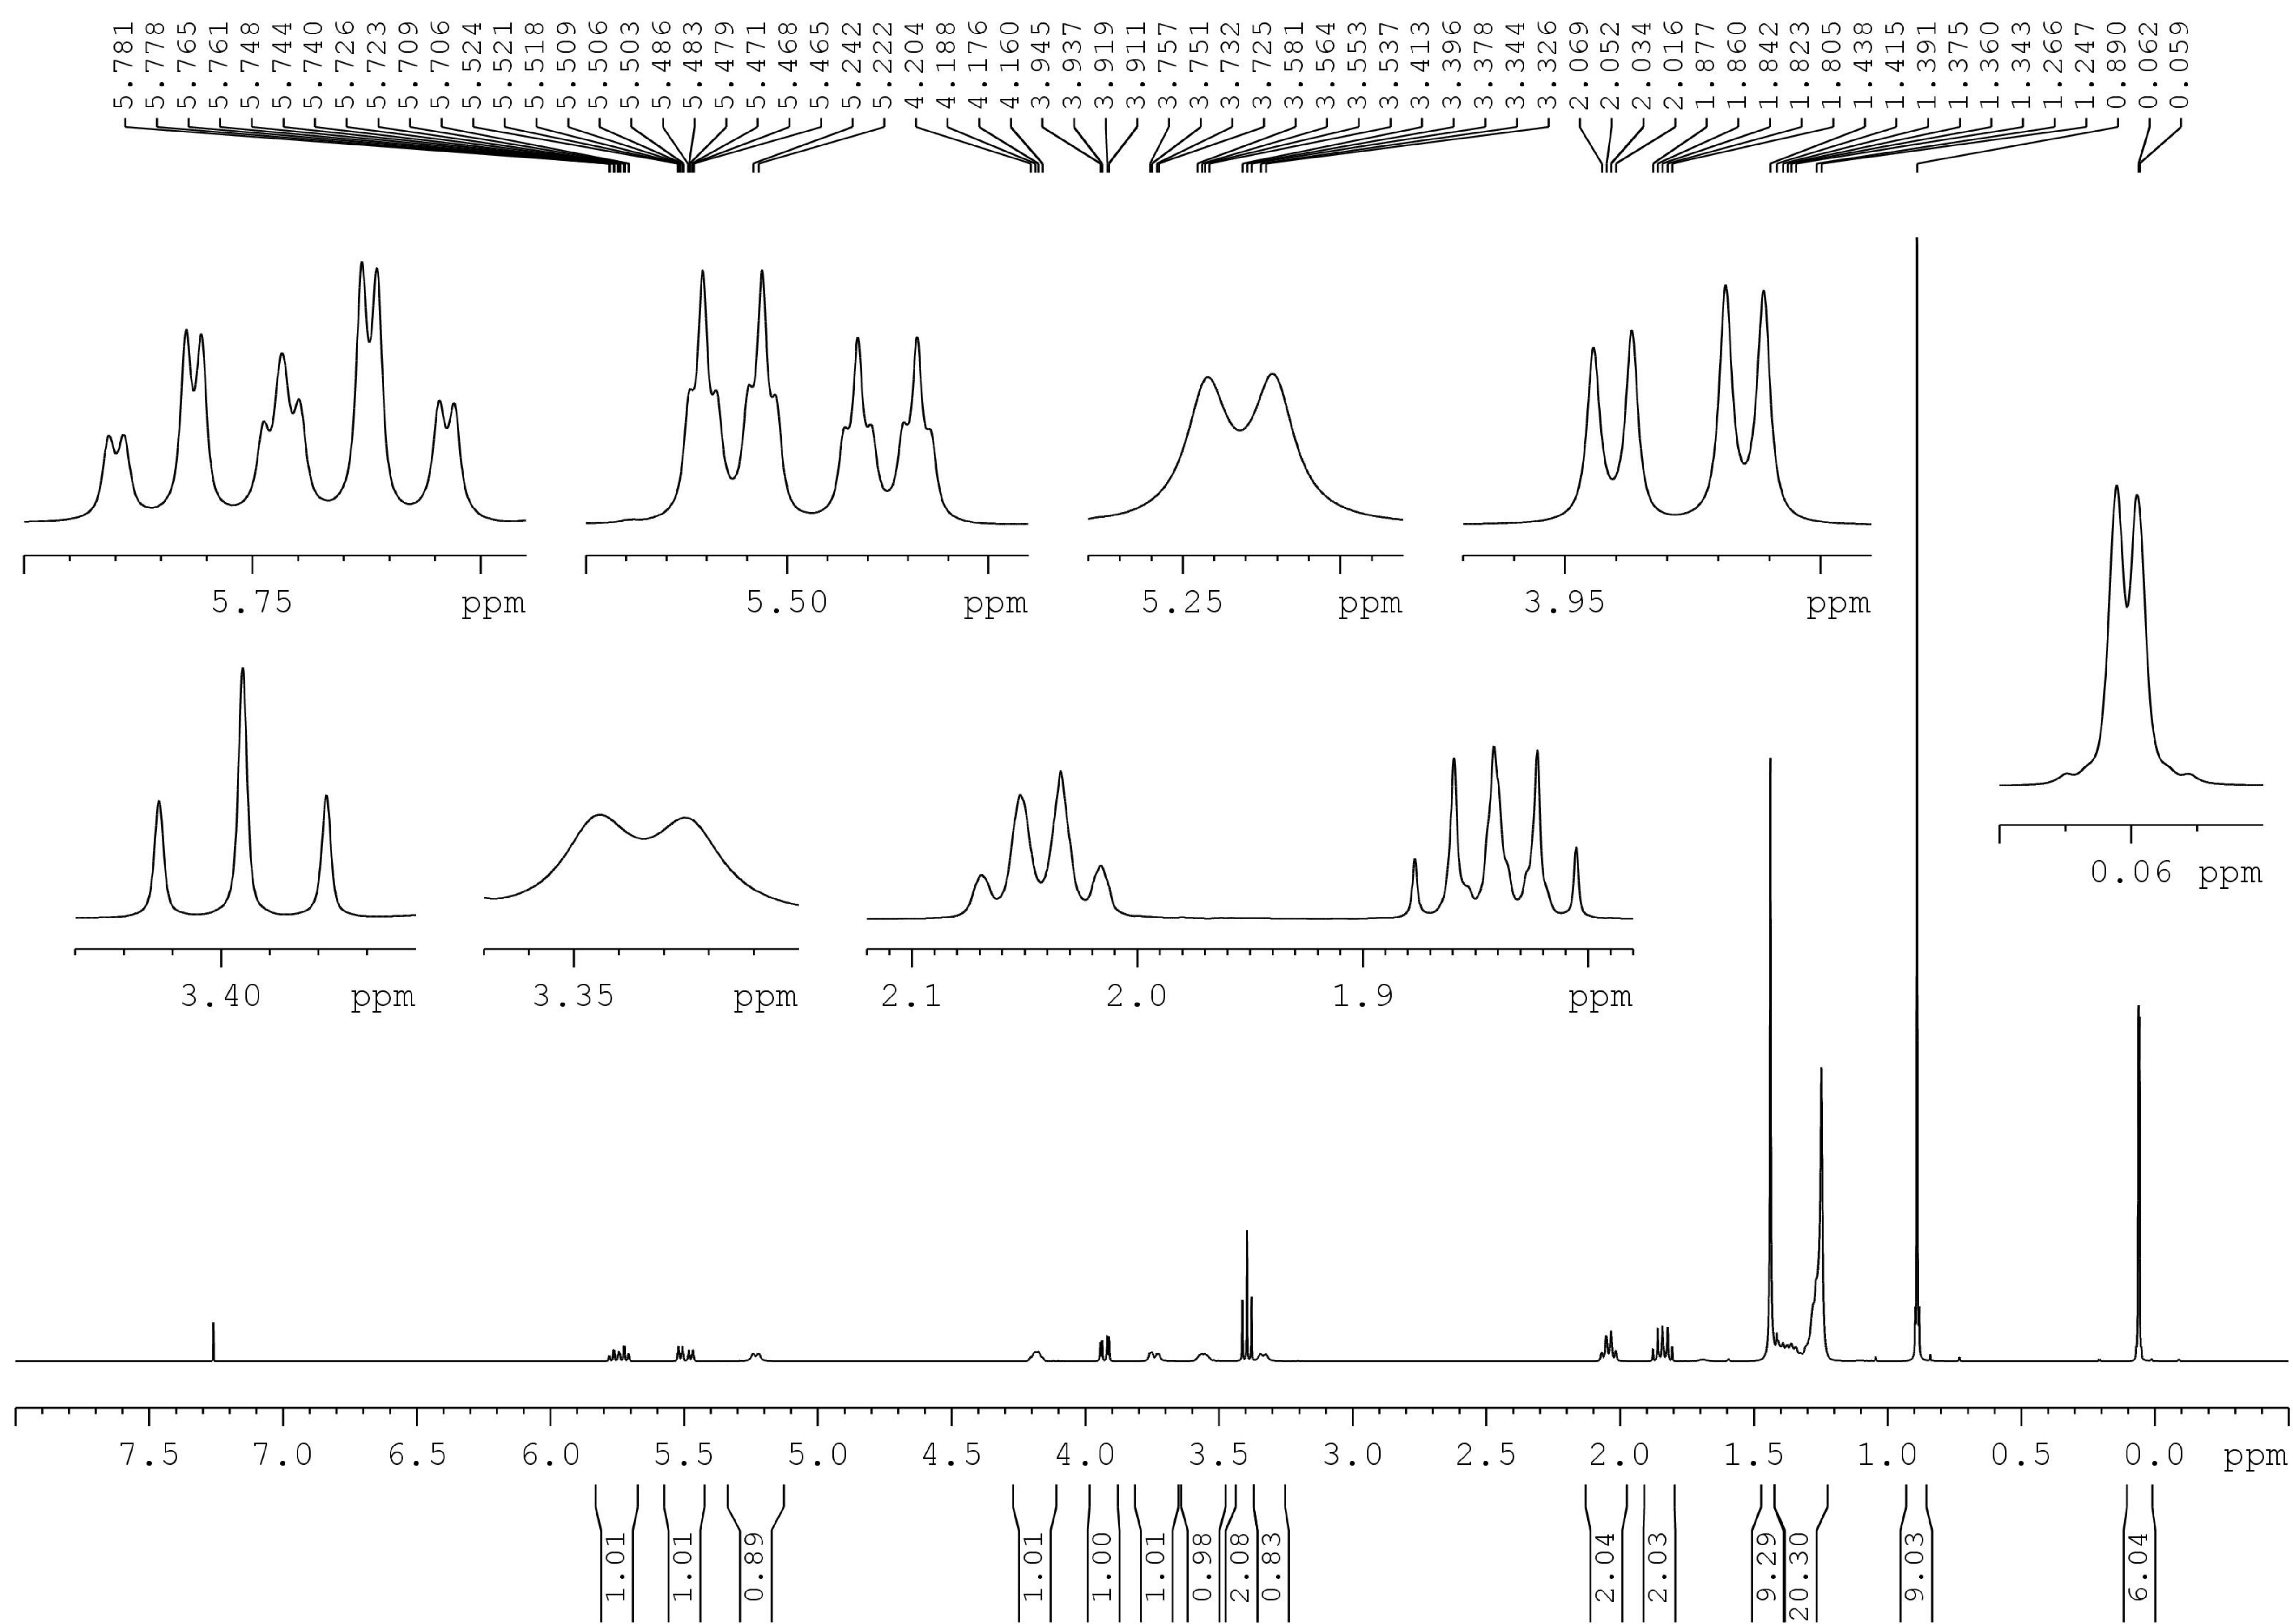

Supplementary Figure 9: <sup>1</sup>H NMR spectrum of **3** (CDCl<sub>3</sub>, 400 MHz).



# Supplementary Figure 10

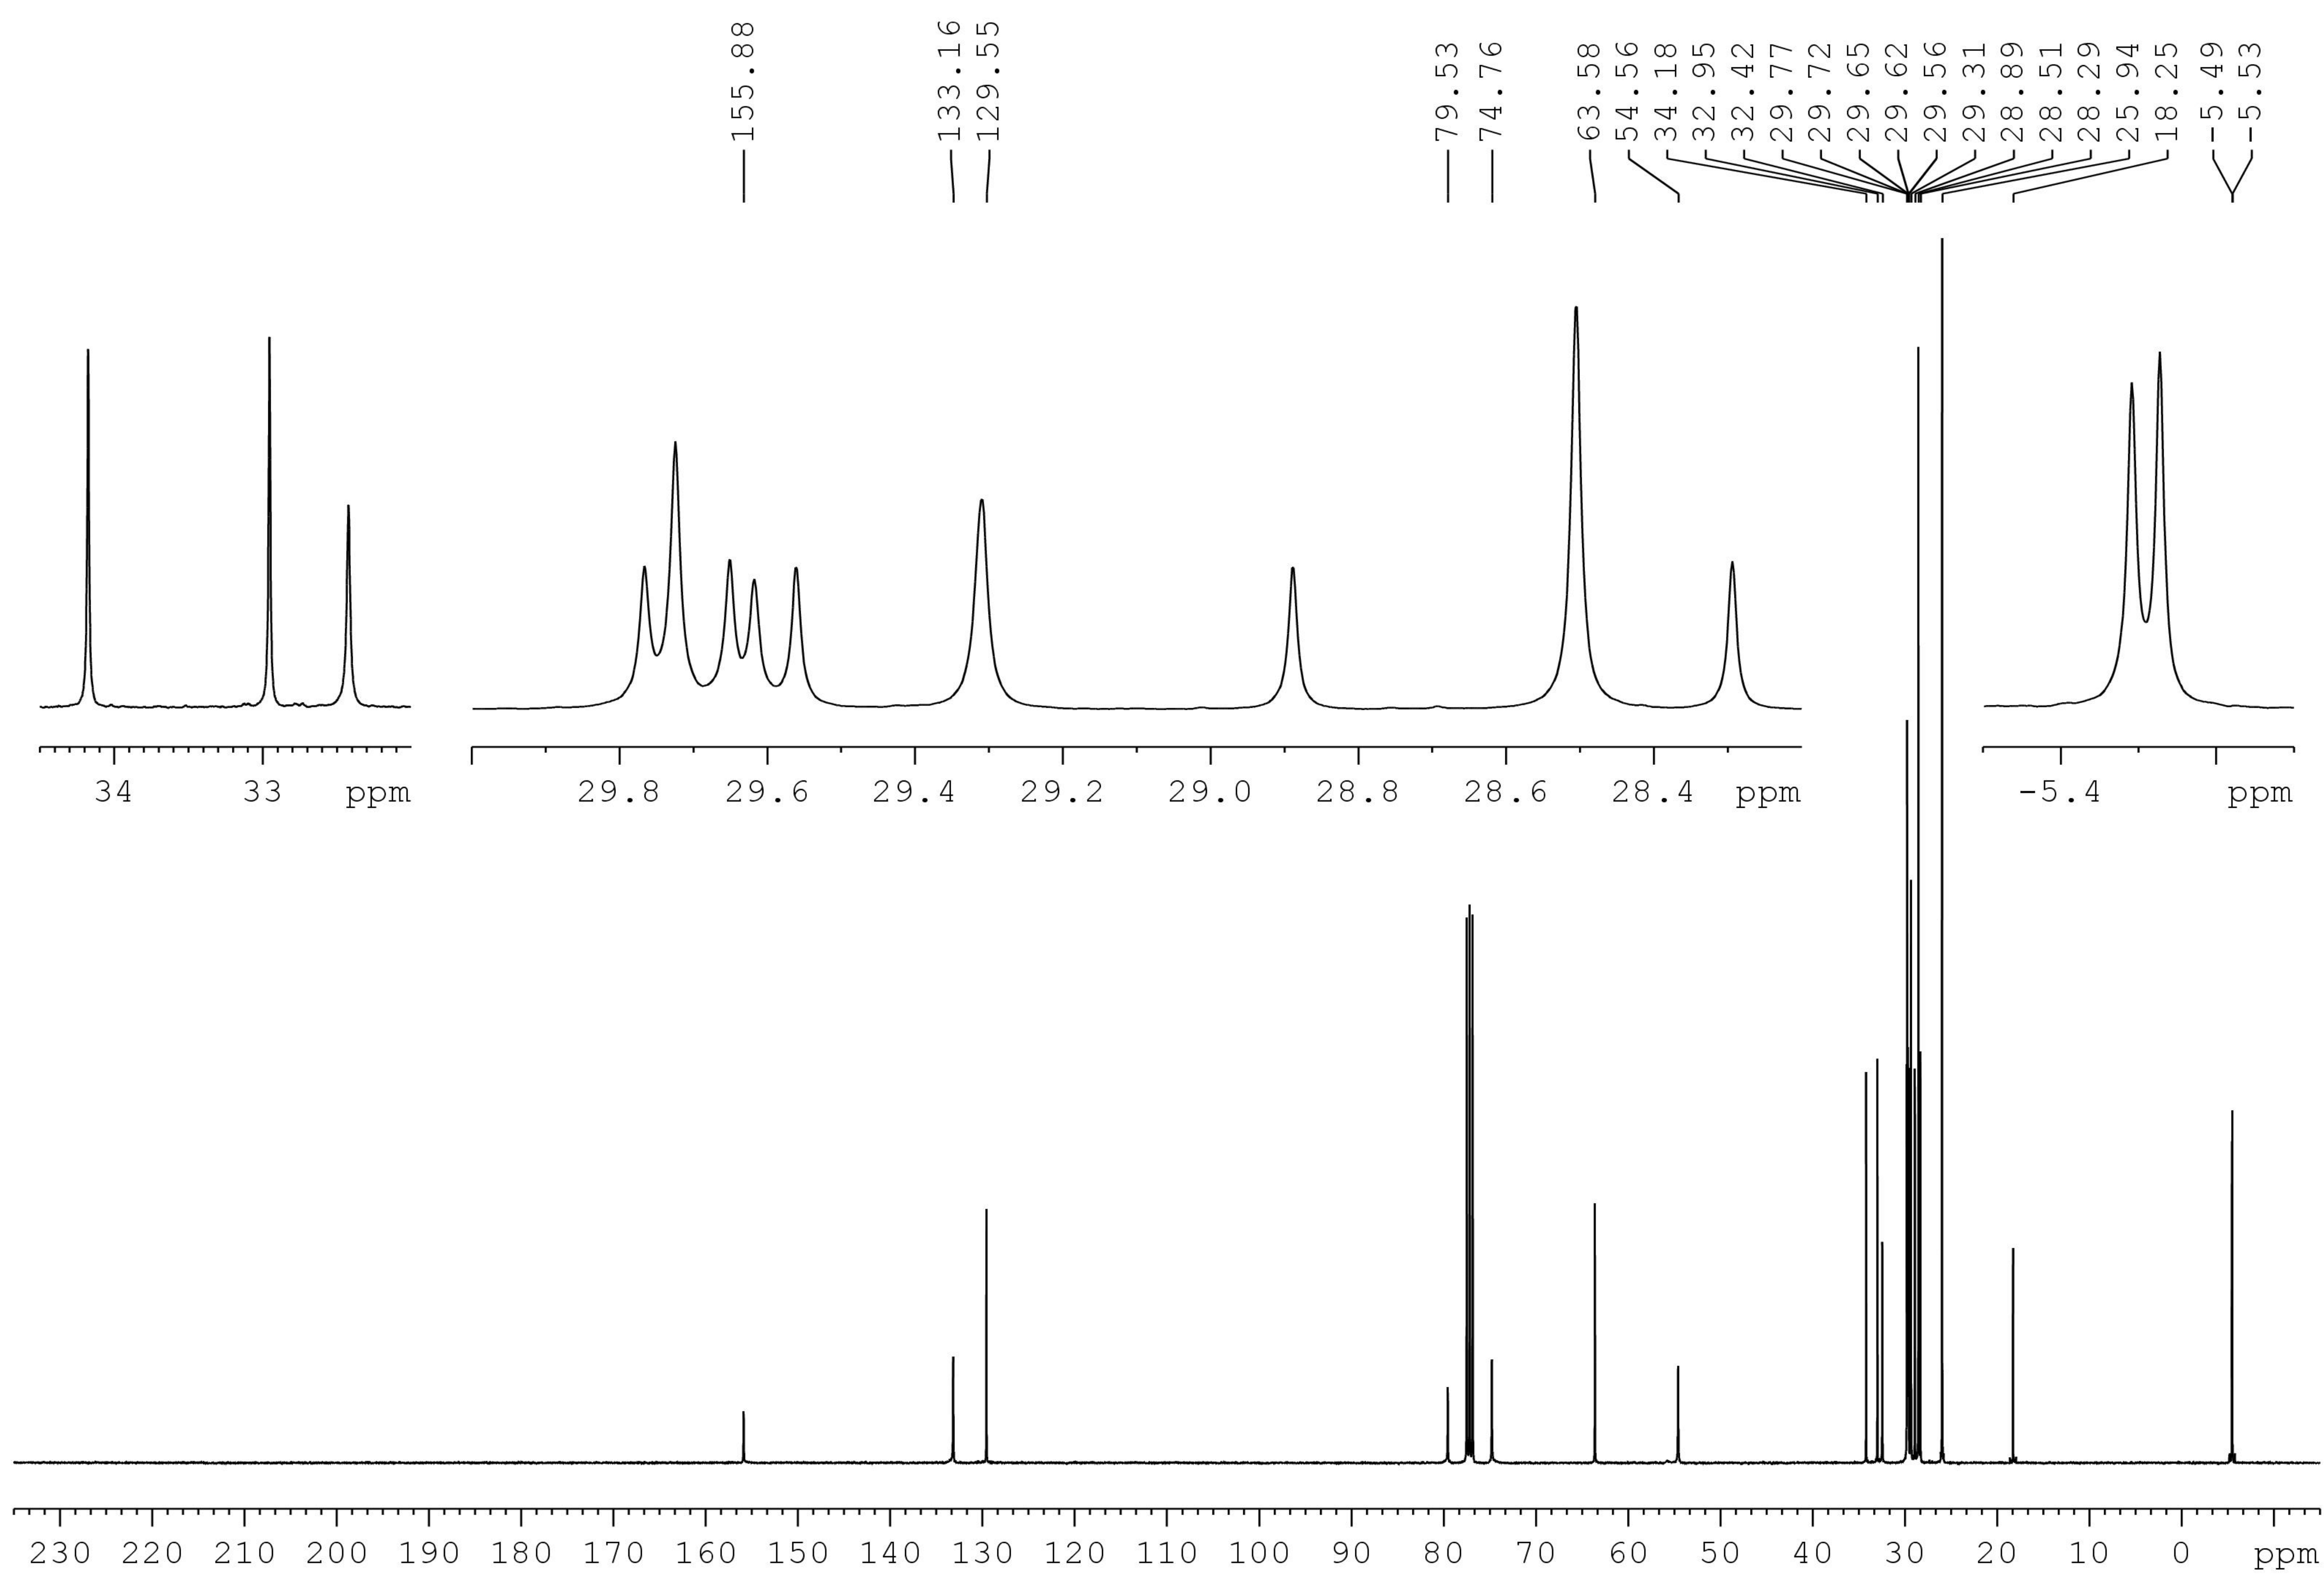

Supplementary Figure 10: <sup>13</sup>C NMR spectrum of **3** (CDCl<sub>3</sub>, 100 MHz).

# Supplementary Figure 11

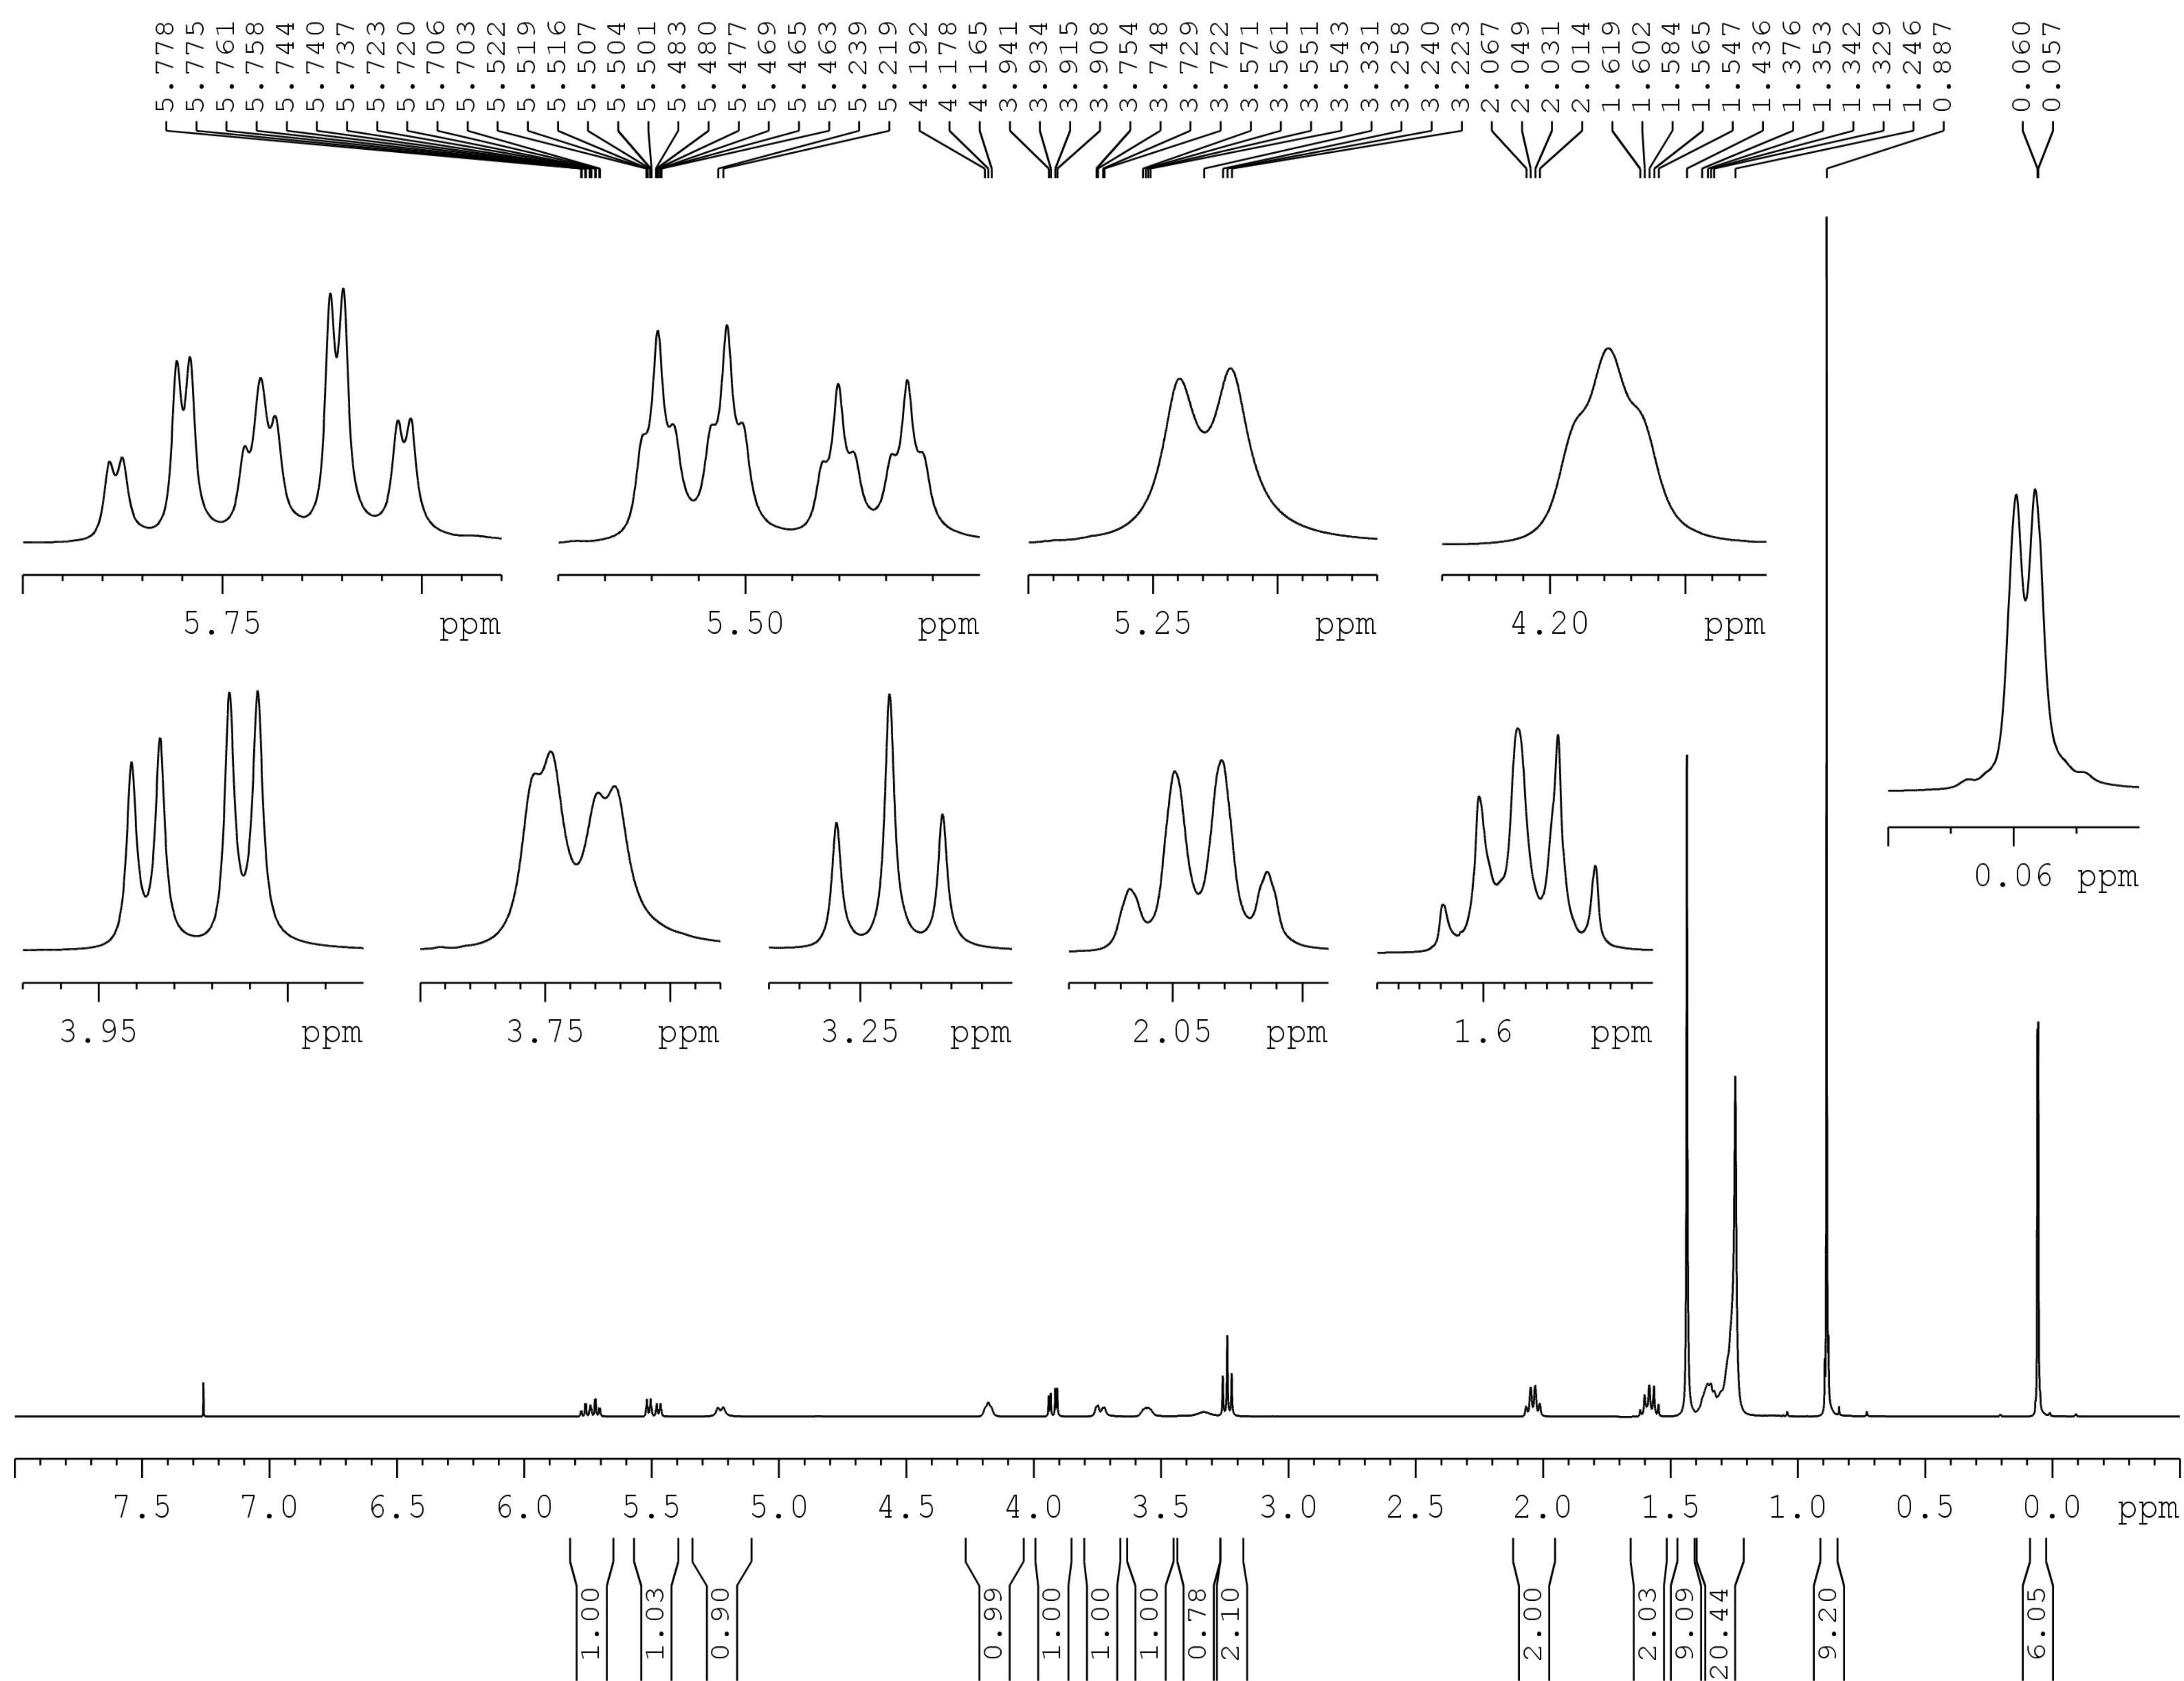

Supplementary Figure 11:  $^1\text{H}$  NMR spectrum of **4** ( $\text{CDCl}_3$ , 400 MHz).

# Supplementary Figure 12

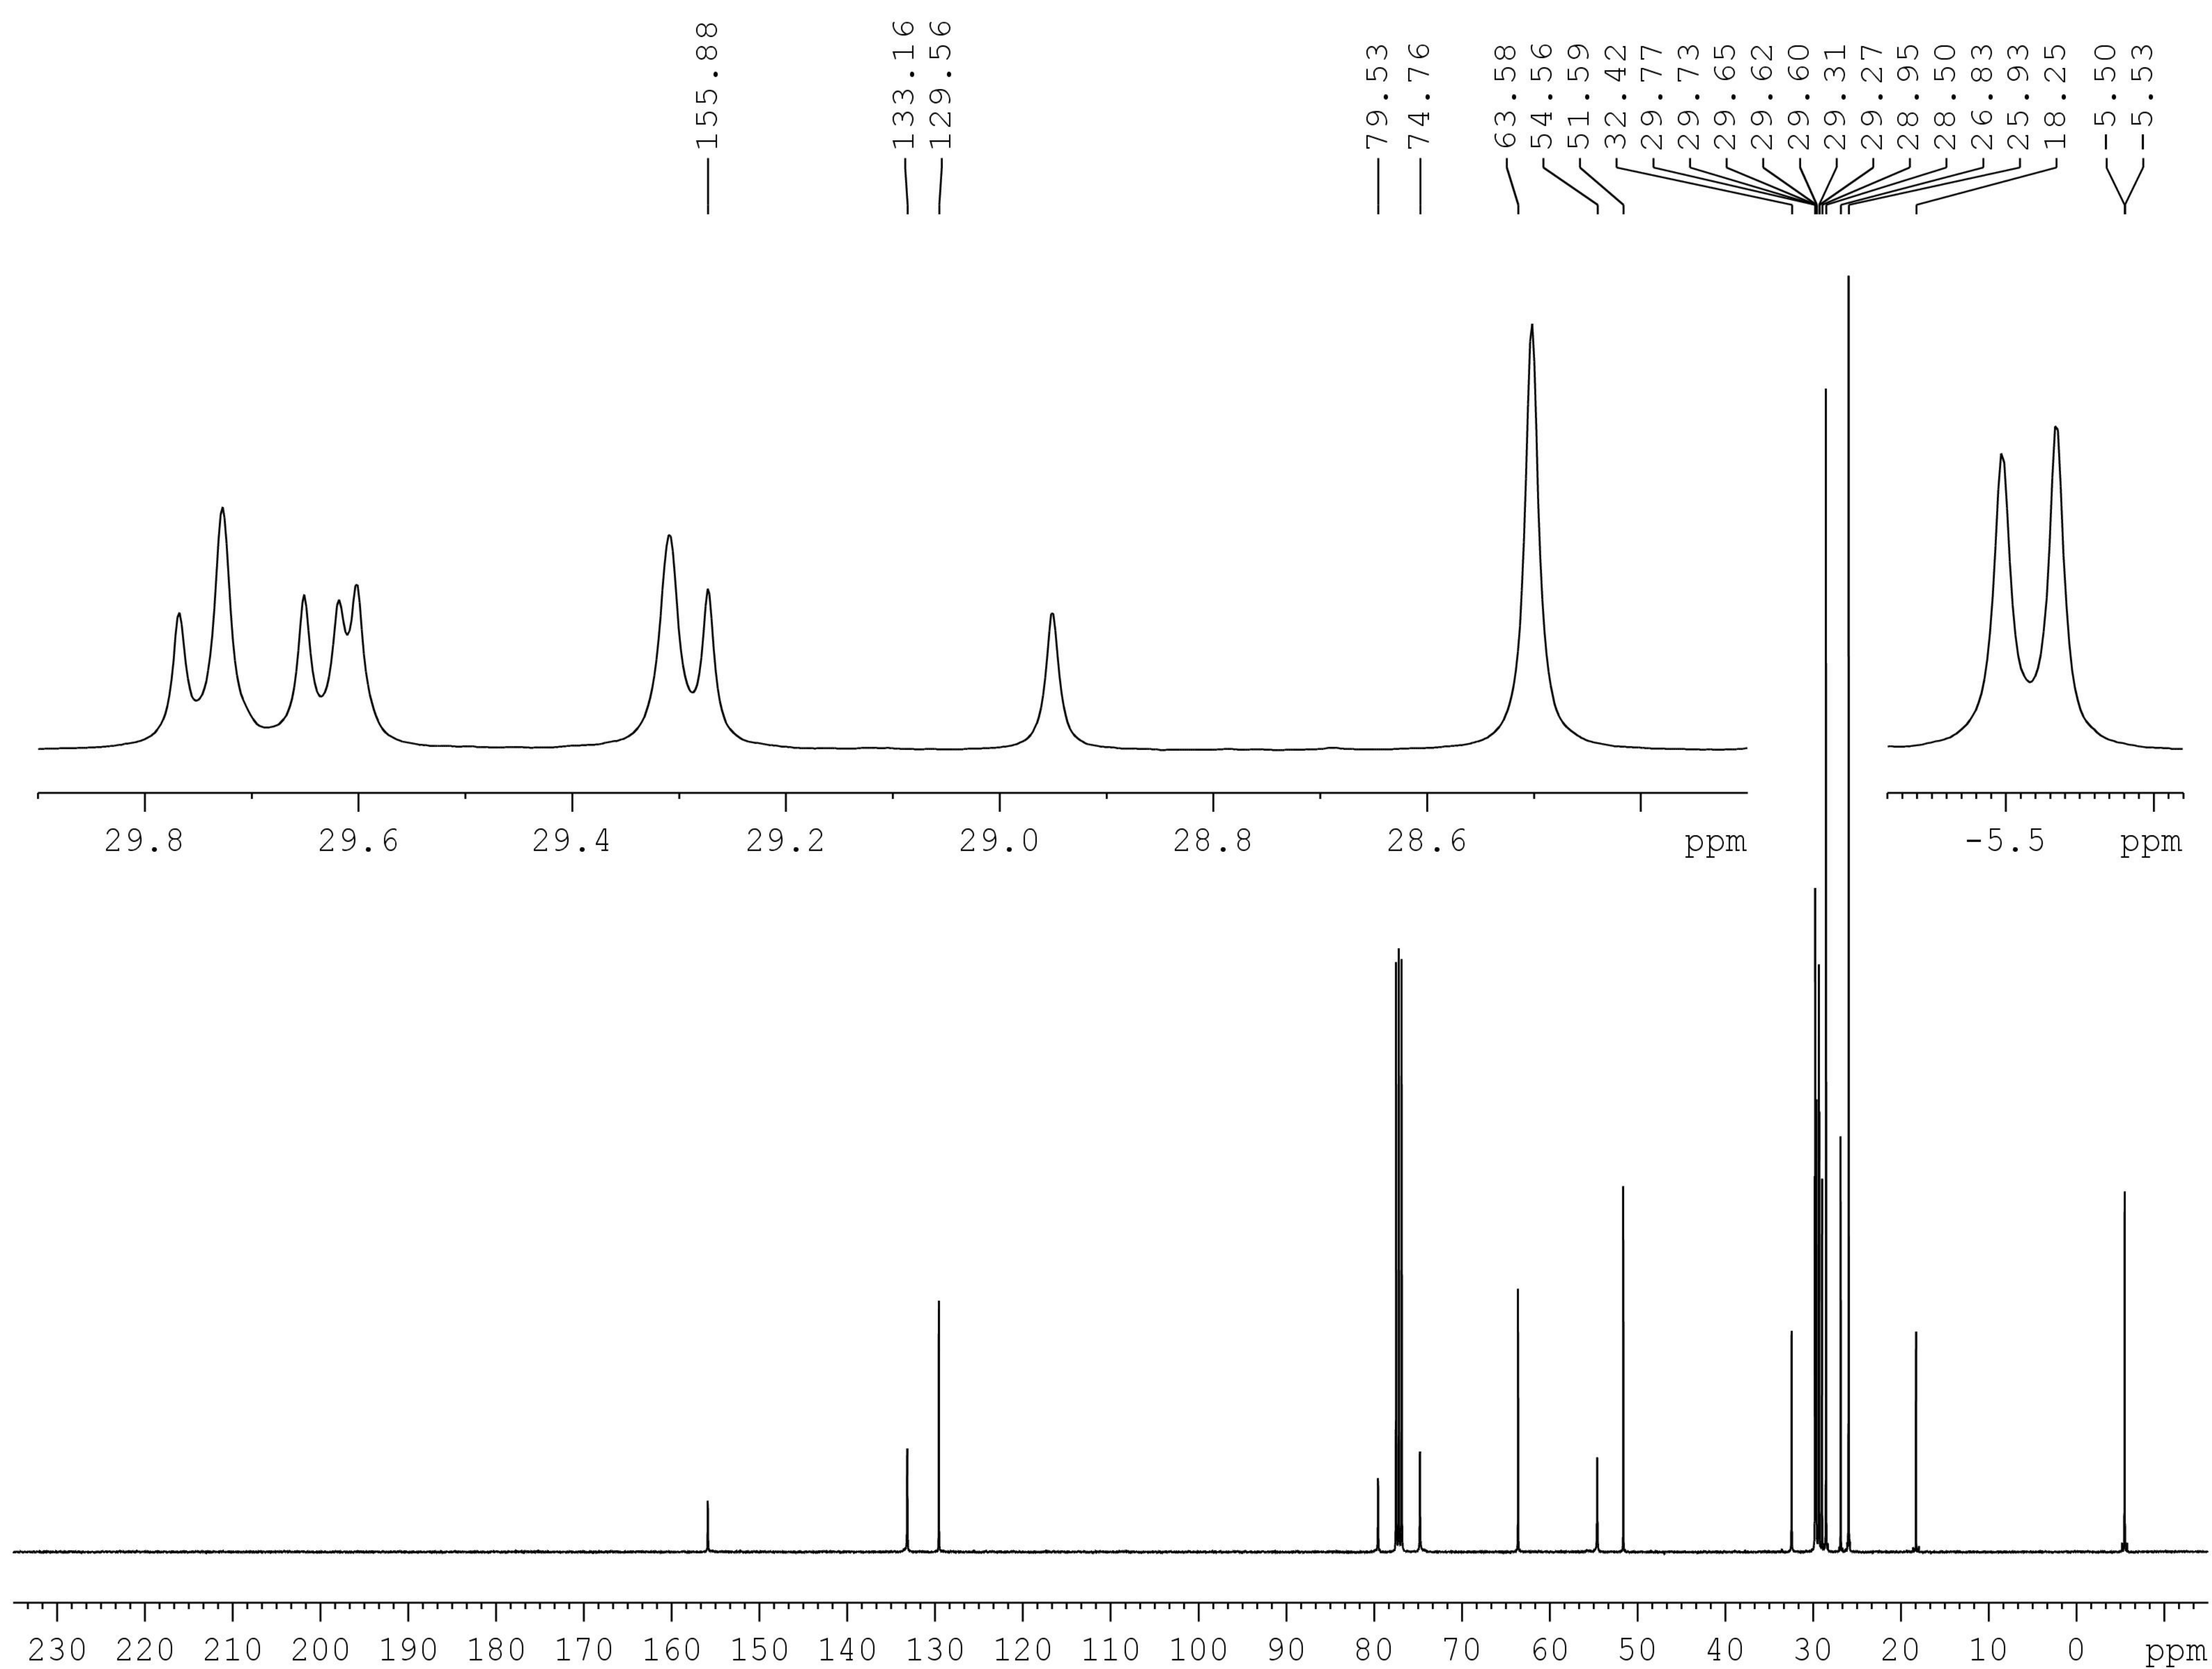

Supplementary Figure 12:  $^{13}\text{C}$  NMR spectrum of **4** ( $\text{CDCl}_3$ , 100 MHz).

# Supplementary Figure 13

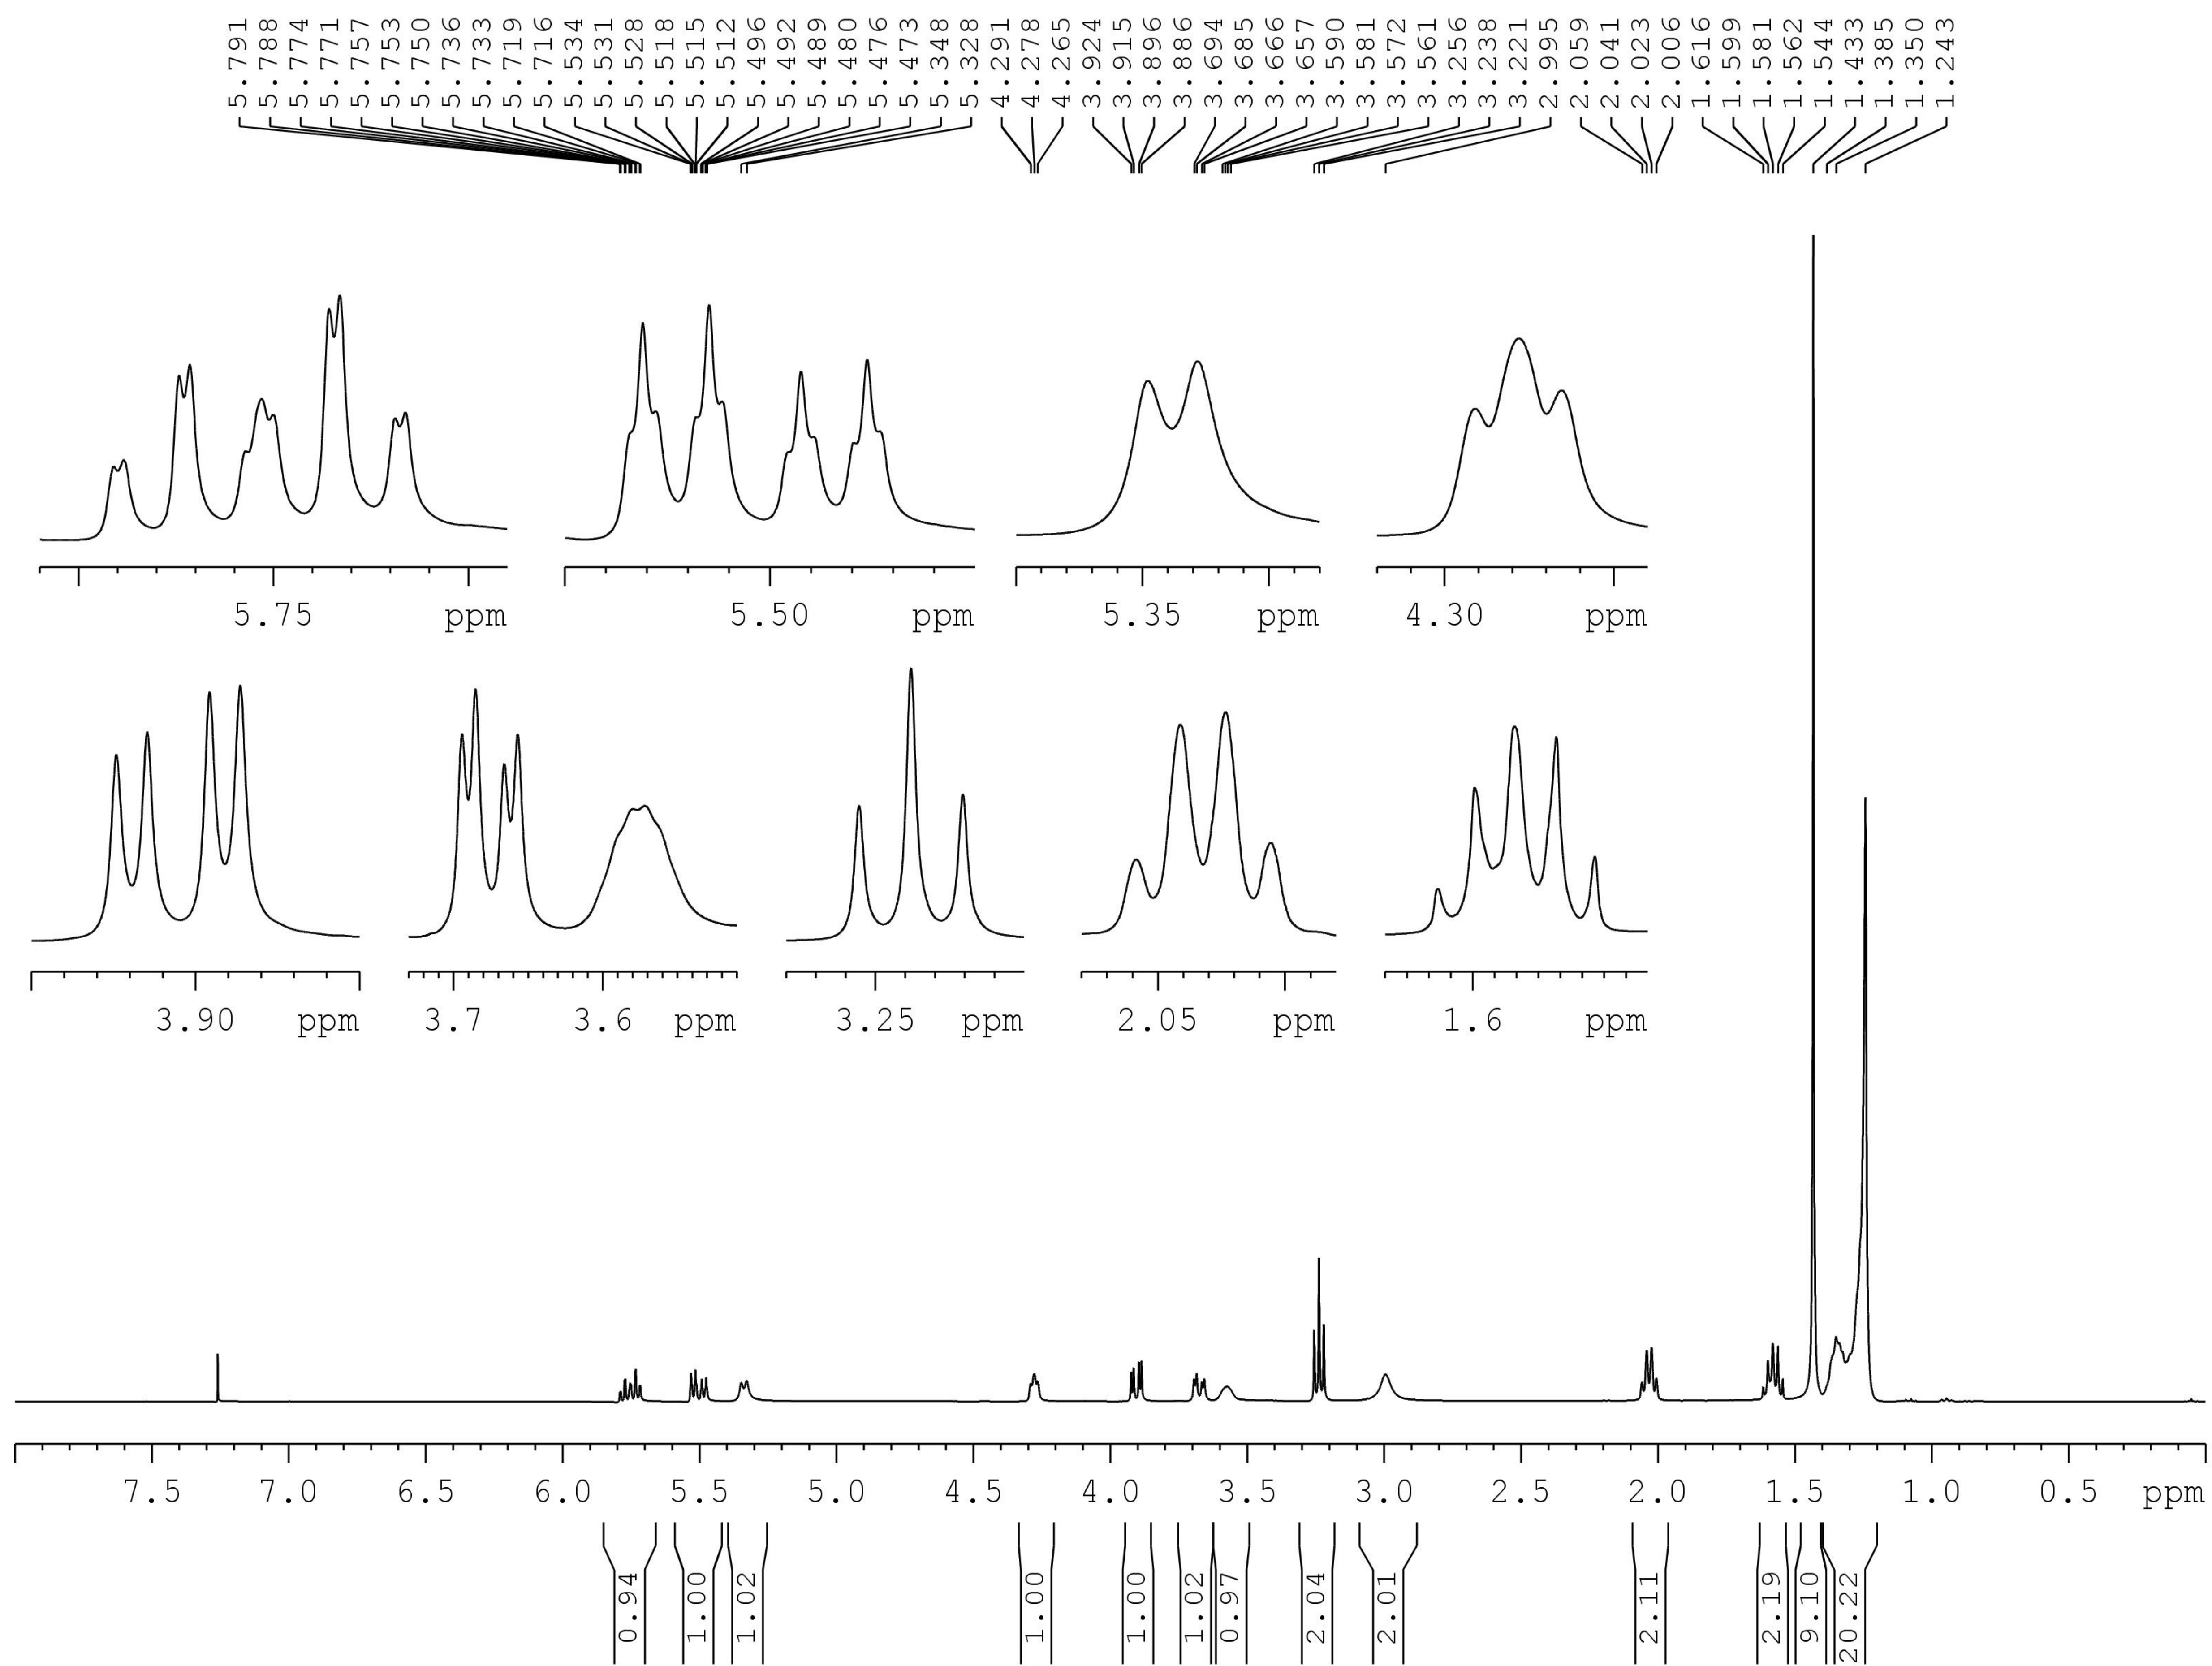

Supplementary Figure 13: <sup>1</sup>H NMR spectrum of 5 (CDCl<sub>3</sub>, 400 MHz).

# Supplementary Figure 14

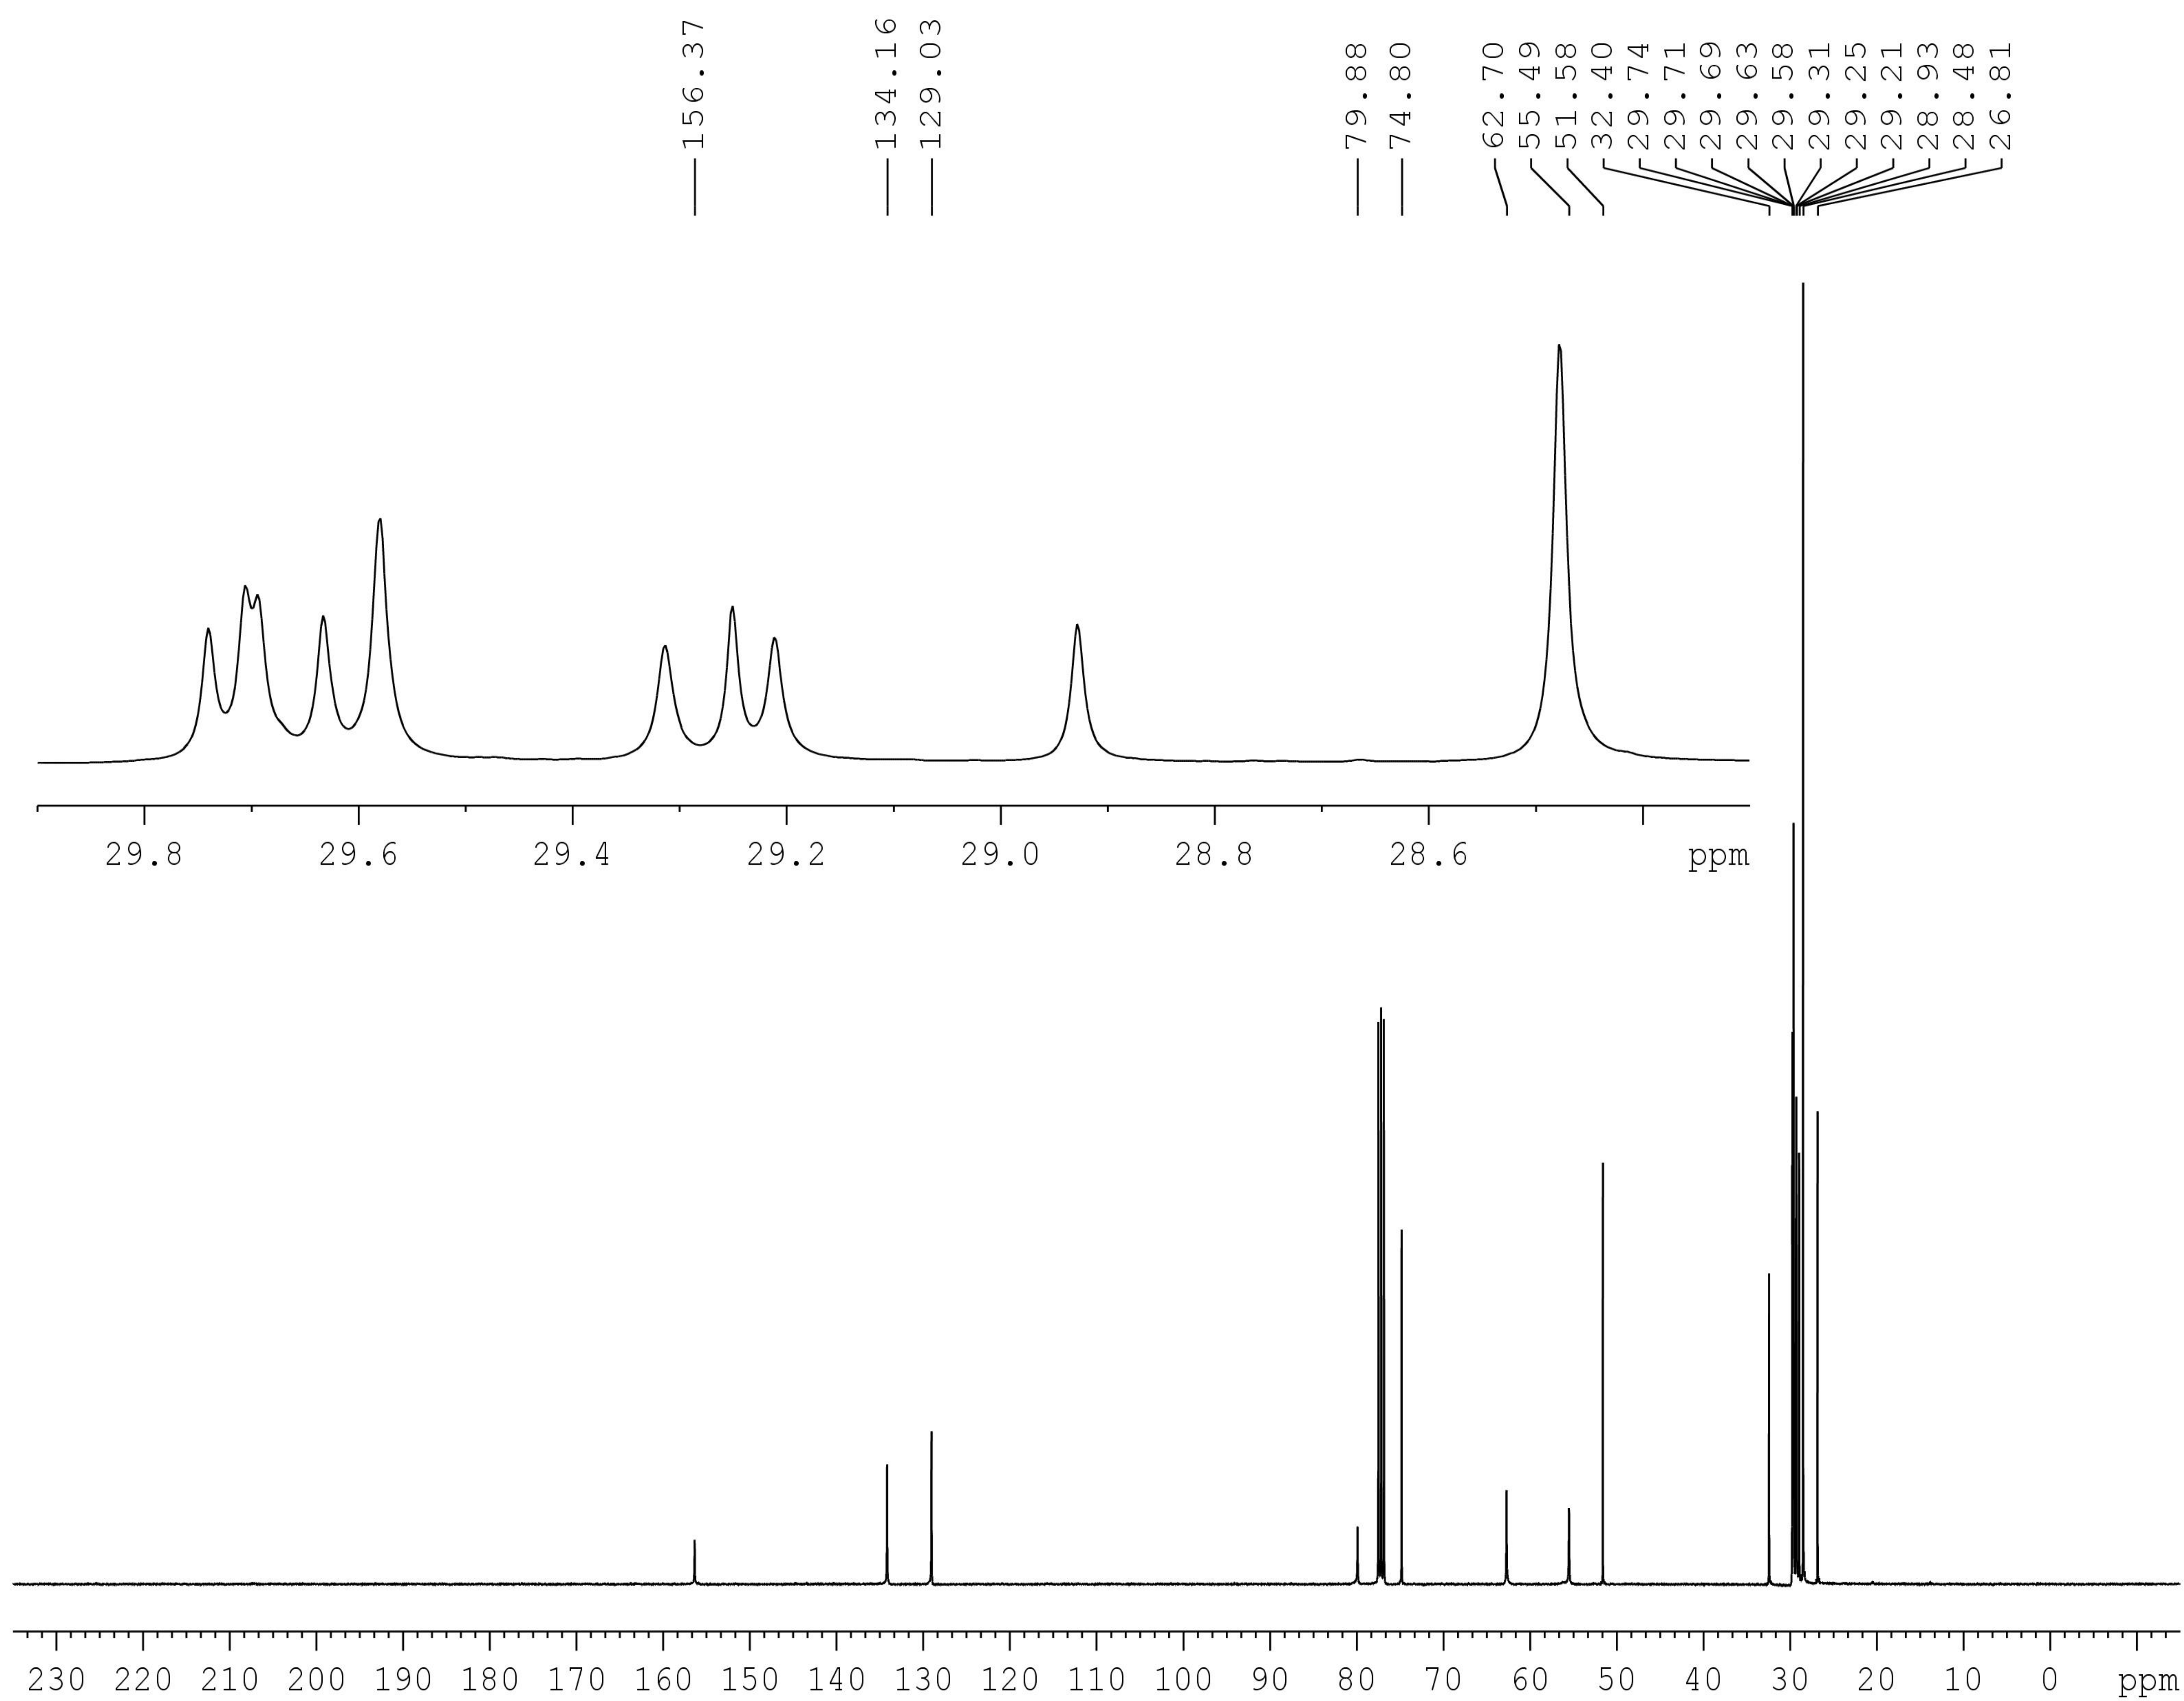

Supplementary Figure 14:  $^{13}\text{C}$  NMR spectrum of **5** ( $\text{CDCl}_3$ , 100 MHz).

# Supplementary Figure 15

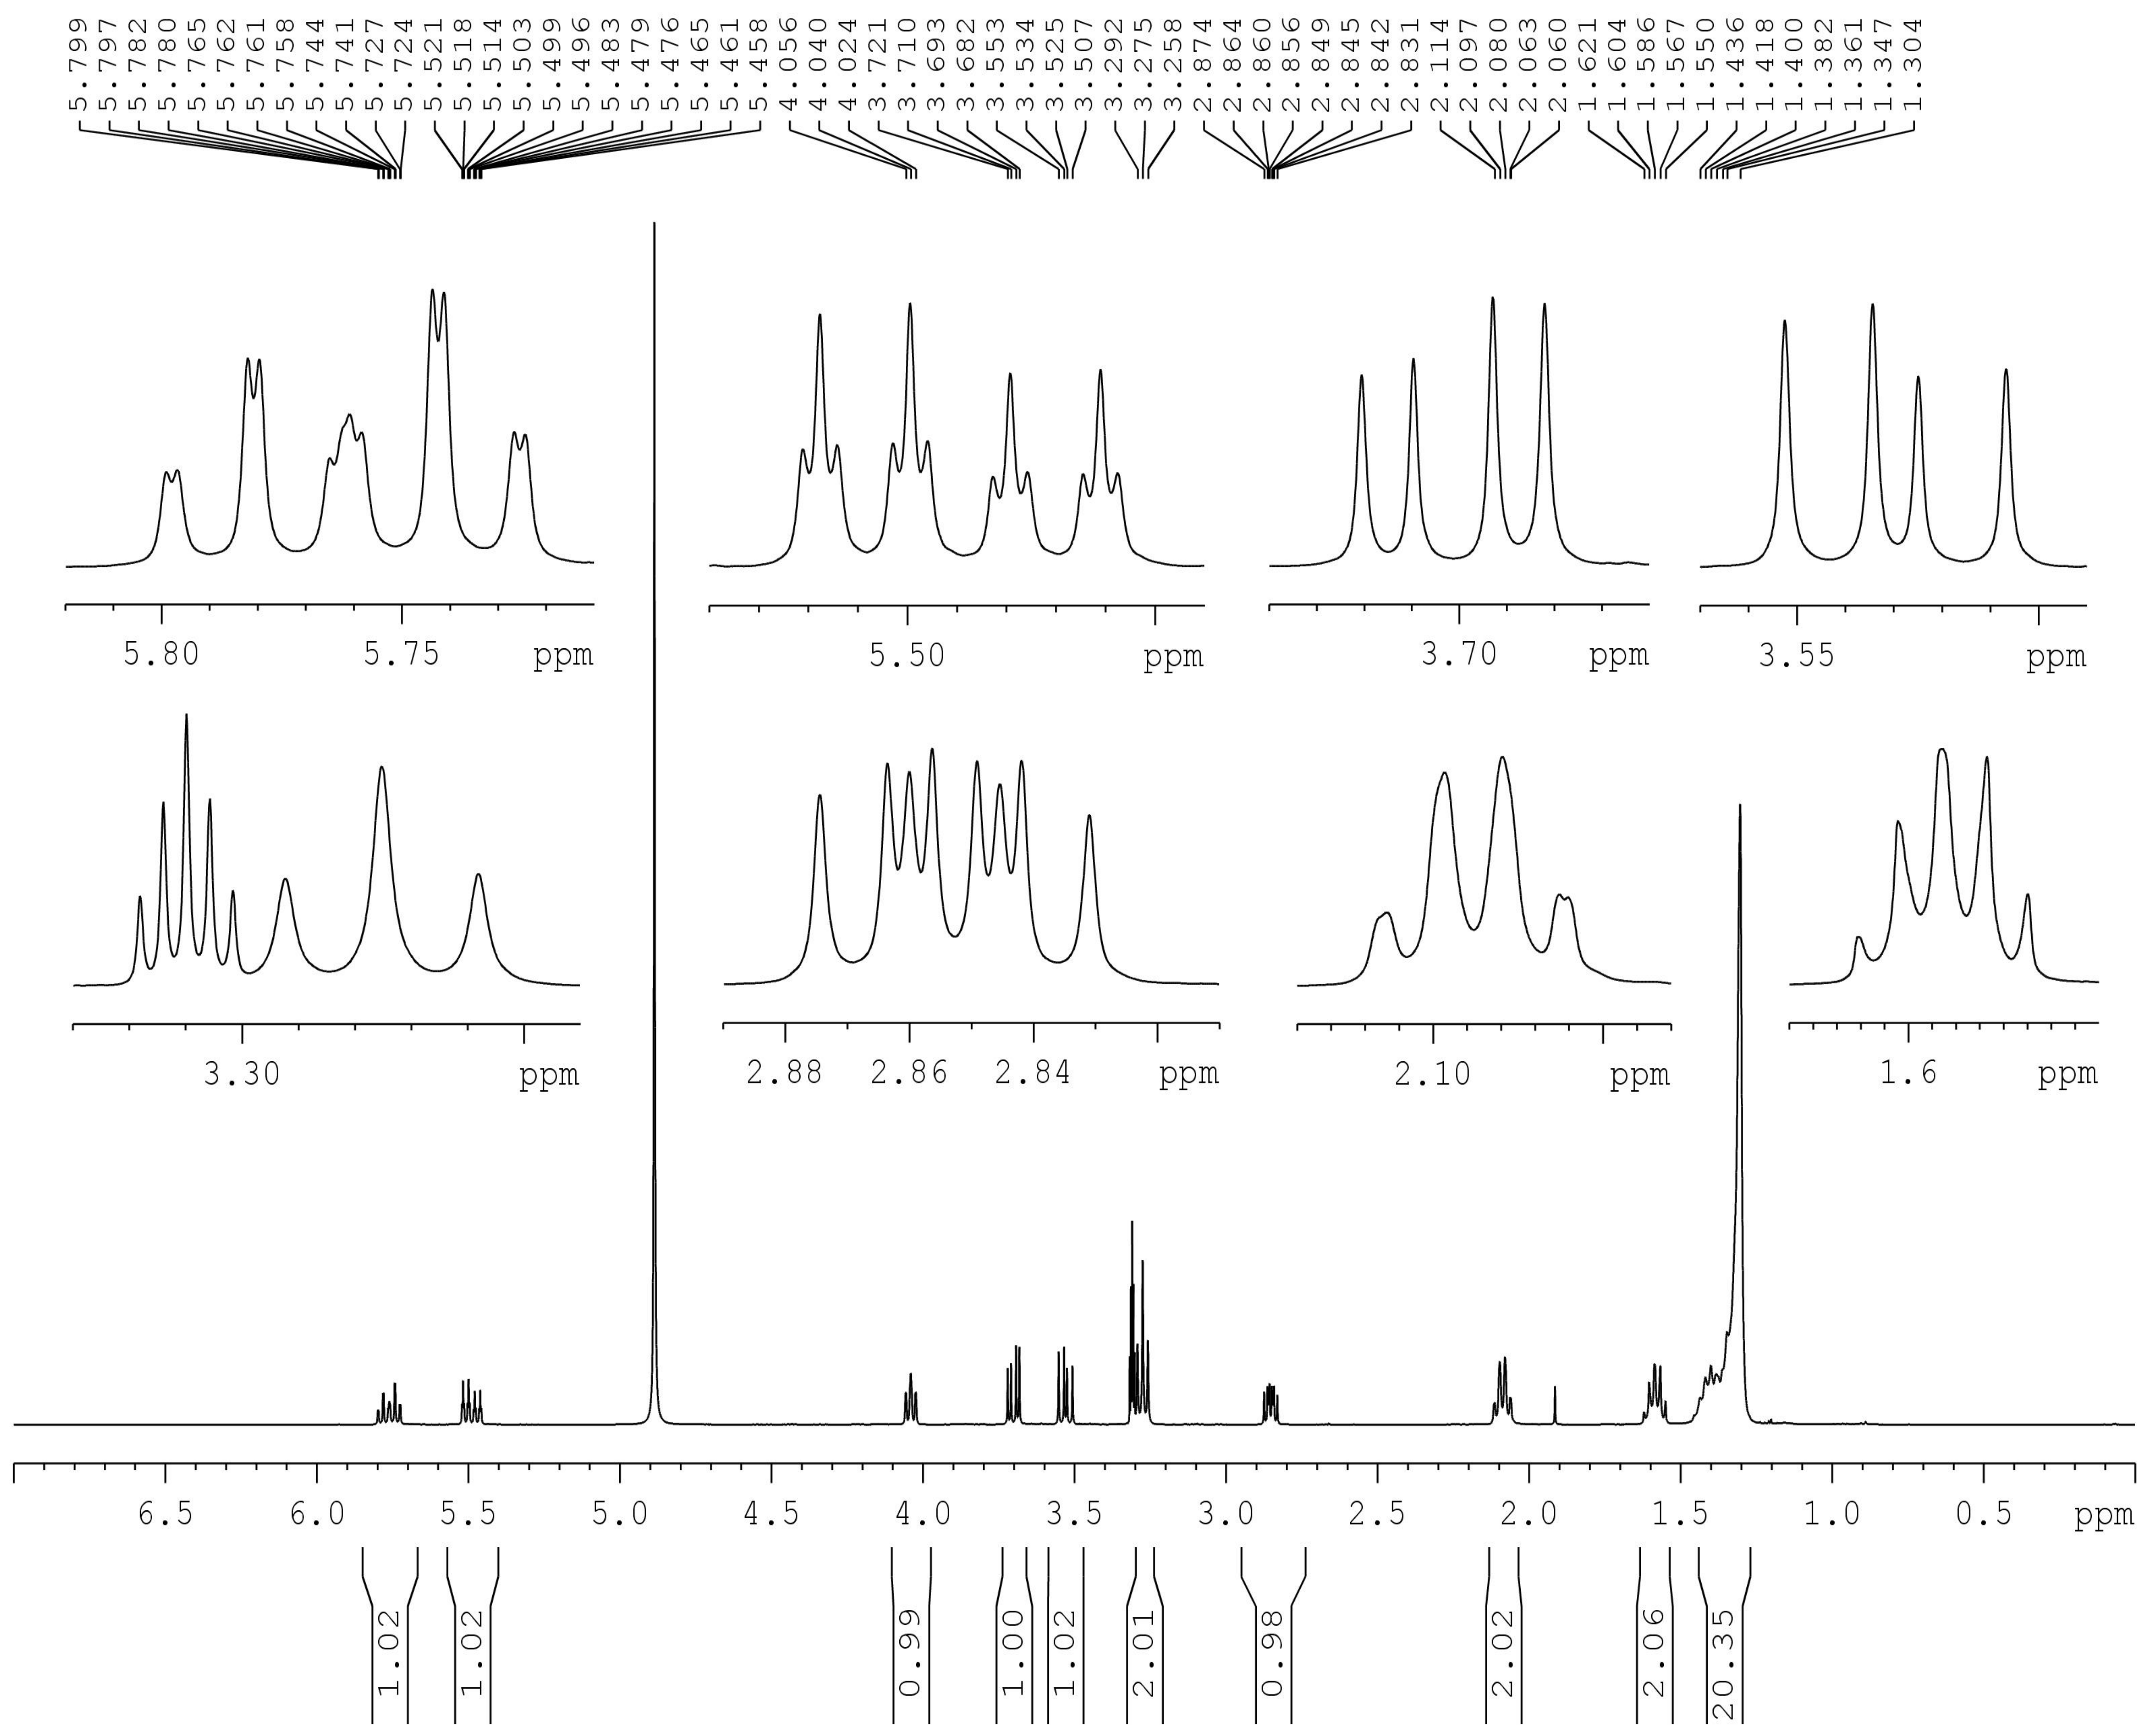

Supplementary Figure 15:  $^1\text{H}$  NMR spectrum of **6** ( $\text{CD}_3\text{OD}$ , 400 MHz).

# Supplementary Figure 16

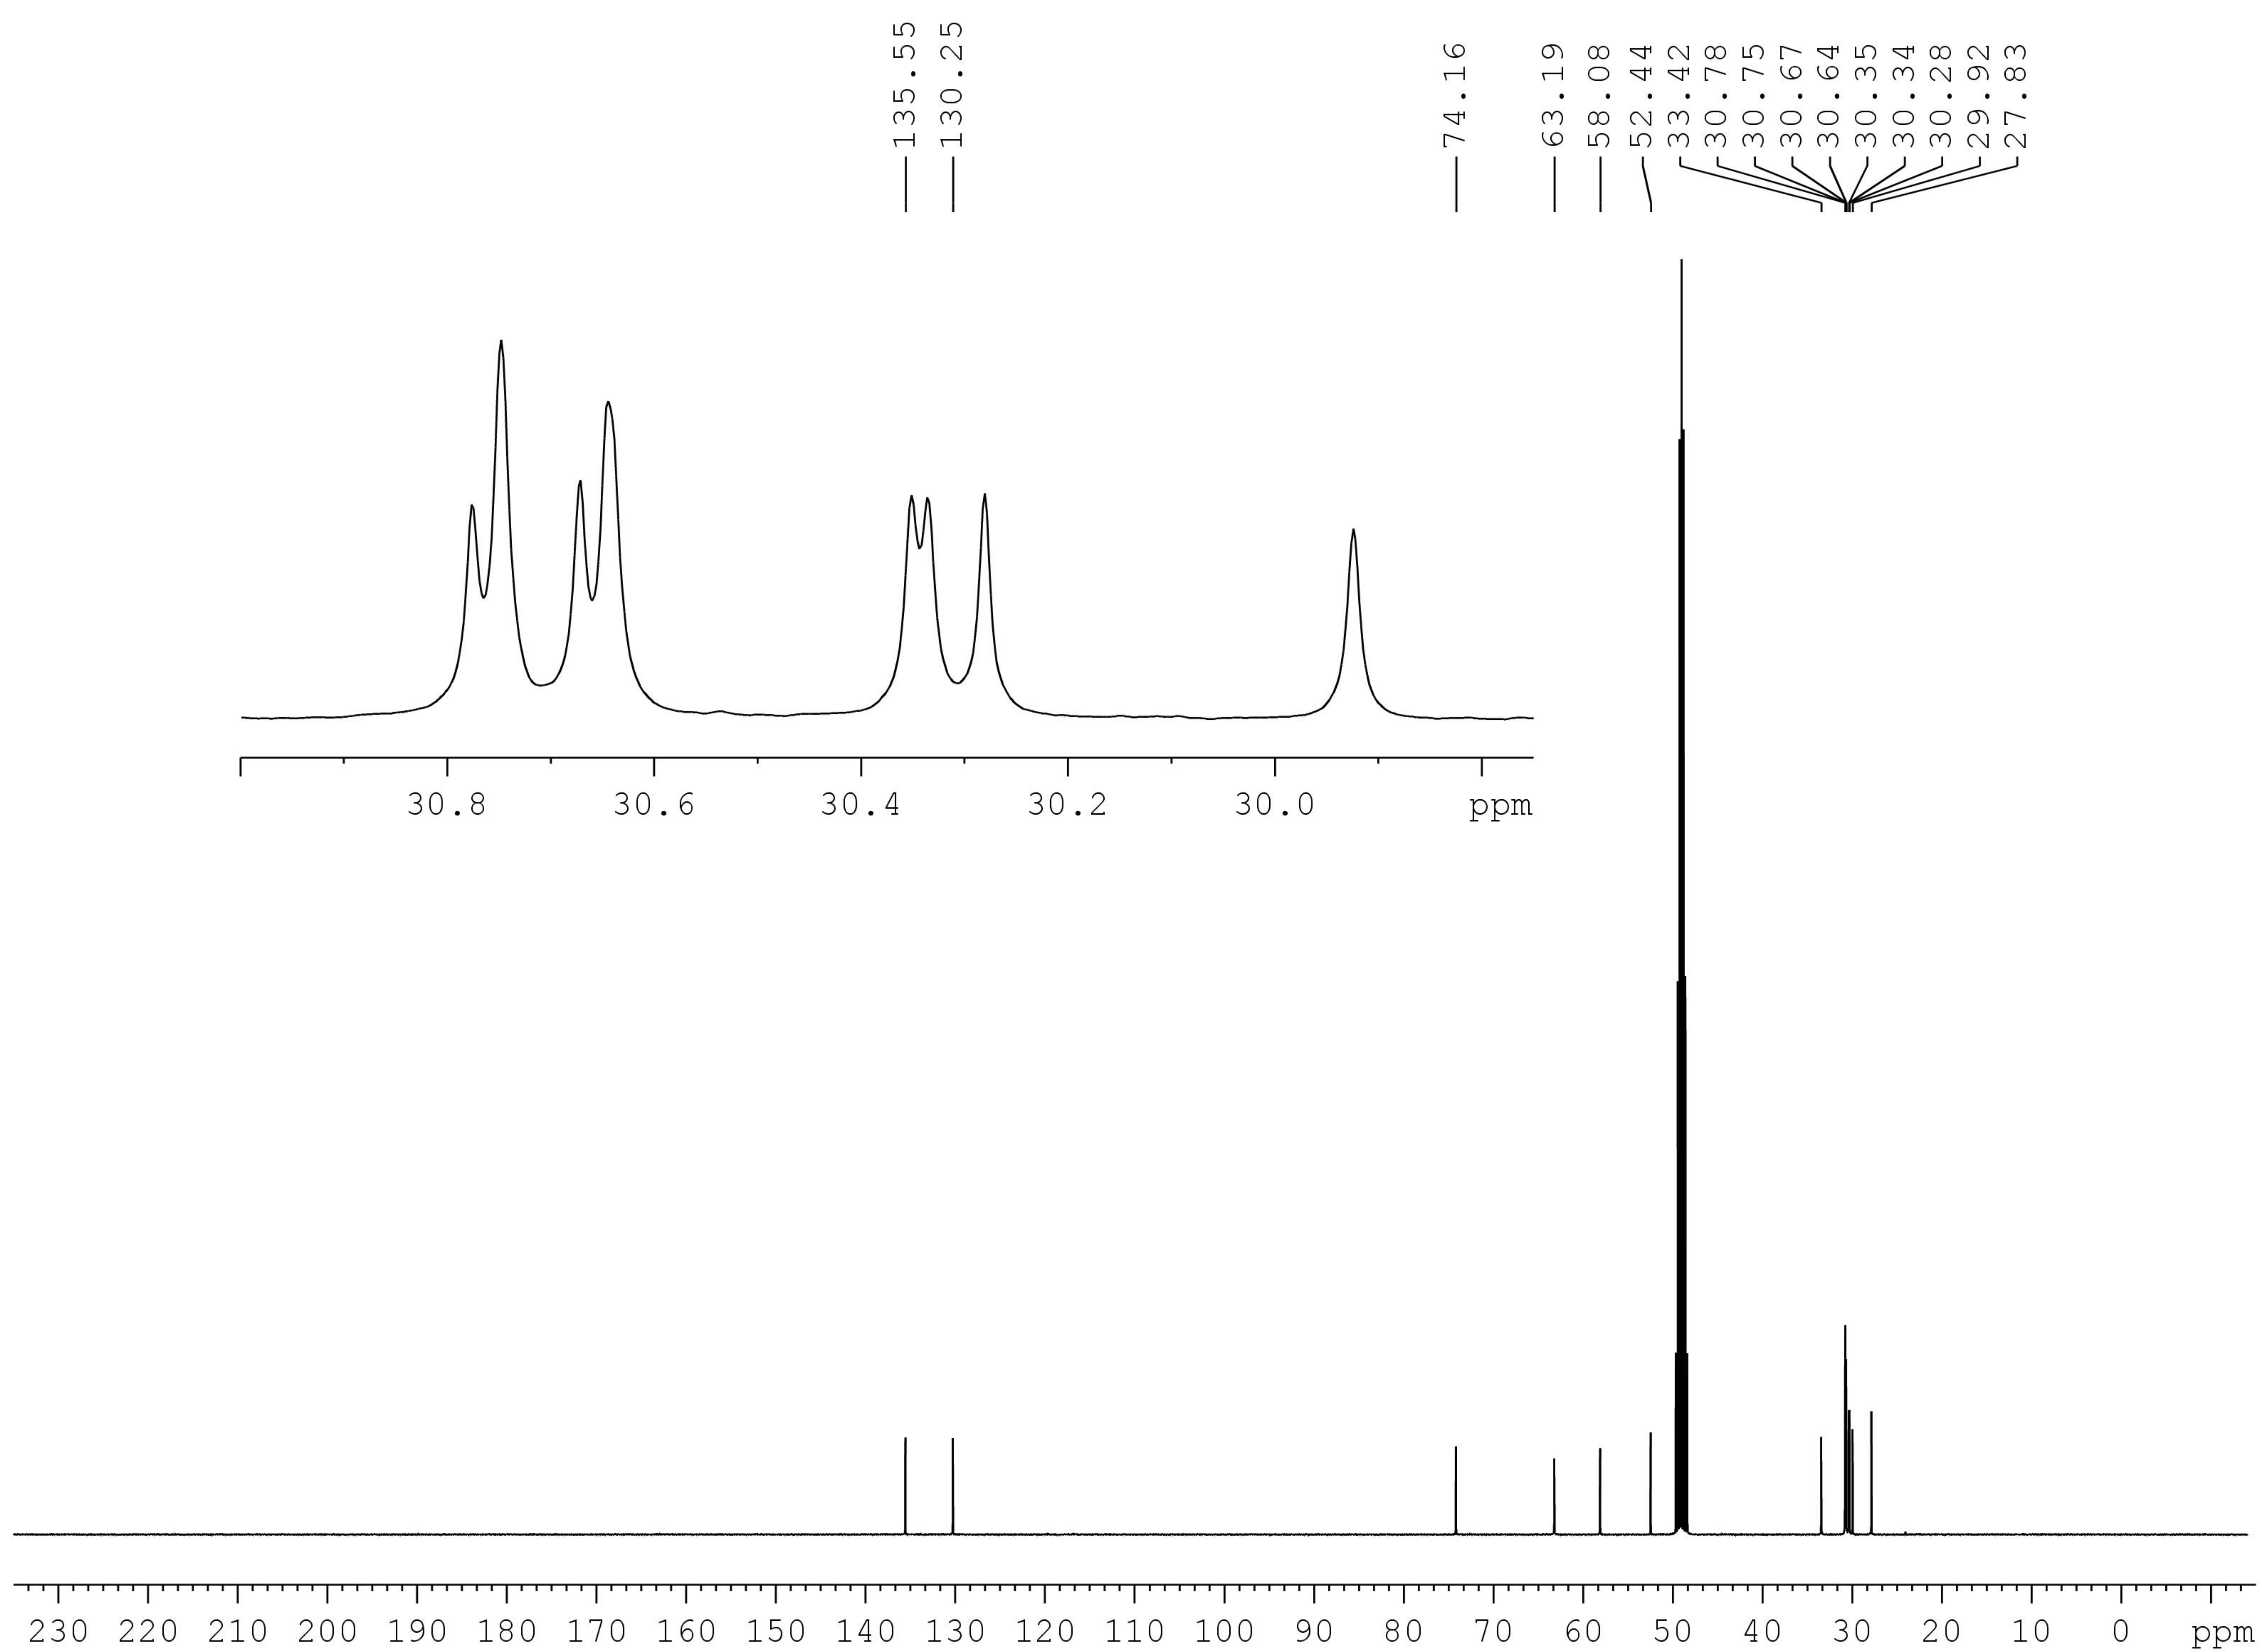

Supplementary Figure 16:  $^{13}\text{C}$  NMR spectrum of **6** ( $\text{CD}_3\text{OD}$ , 100 MHz).

# Supplementary Figure 17

## Mass Spectrum SmartFormula Report

| Analysis Info |                                                 | Acquisition Date | 12/9/2016 9:37:06 AM         |  |
|---------------|-------------------------------------------------|------------------|------------------------------|--|
| Analysis Name | D:\Data\Spektren2016\2016_3206_SEI_24_01_1010.d | Operator         | J.Adelmann                   |  |
| Method        | automation_esi_tune_pos_mid_ja.m                | Instrument       | micrOTOF-Q III 8228888.20516 |  |
| Sample Name   | 2016_3206_SEI                                   |                  |                              |  |
| Comment       | Fink Julian<br>JF021<br>6 pmol/ul in MeCN/CHCl3 |                  |                              |  |

| Acquisition Parameter |            |                 |           |                  |           |
|-----------------------|------------|-----------------|-----------|------------------|-----------|
| Source Type           | ESI        | Ion Polarity    | Positive  | Set Nebulizer    | 0.7 Bar   |
| Focus                 | Not active | Set Funnel 1 RF | 300.0 Vpp | Set Dry Heater   | 200 °C    |
| Scan Begin            | 50 m/z     | Set Funnel 2 RF | 400.0 Vpp | Set Dry Gas      | 5.0 l/min |
| Scan End              | 3500 m/z   | Set Hexapole RF | 500.0 Vpp | Set Divert Valve | Source    |

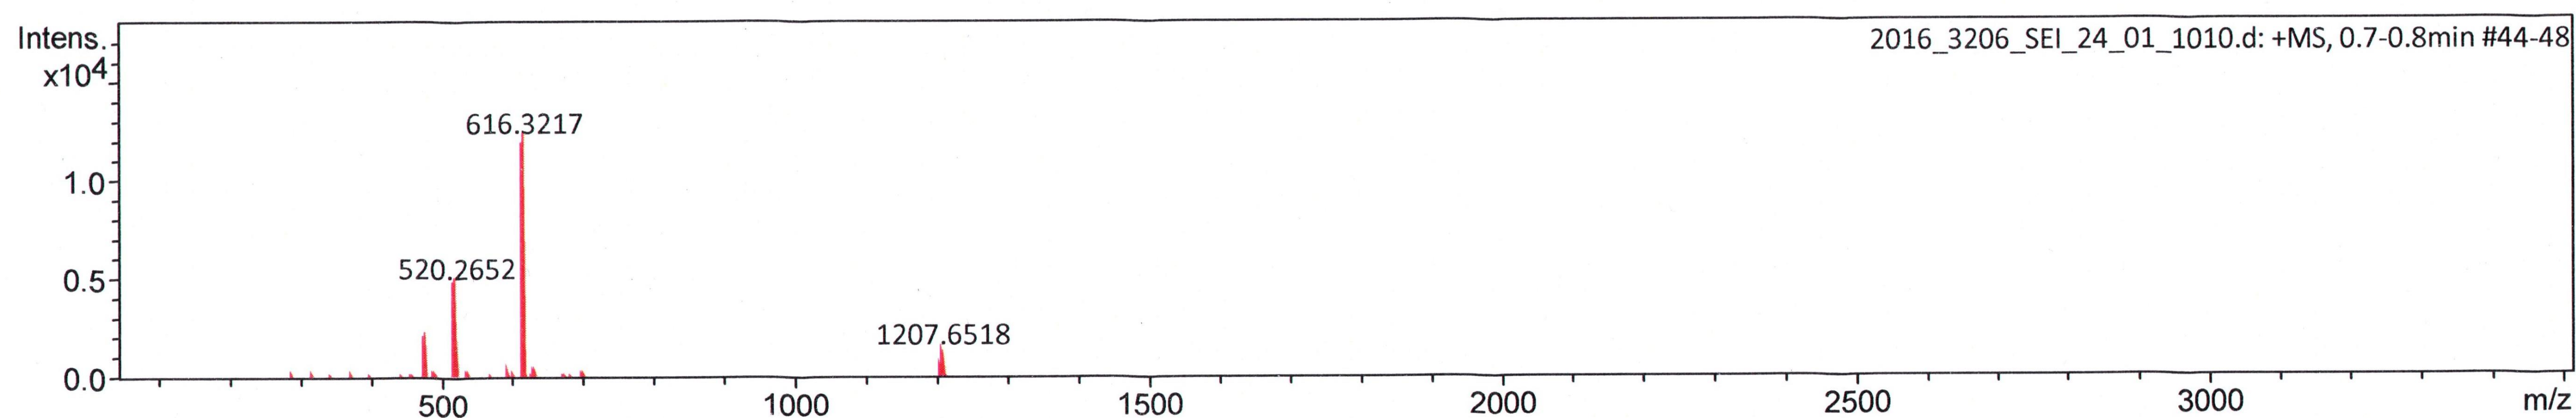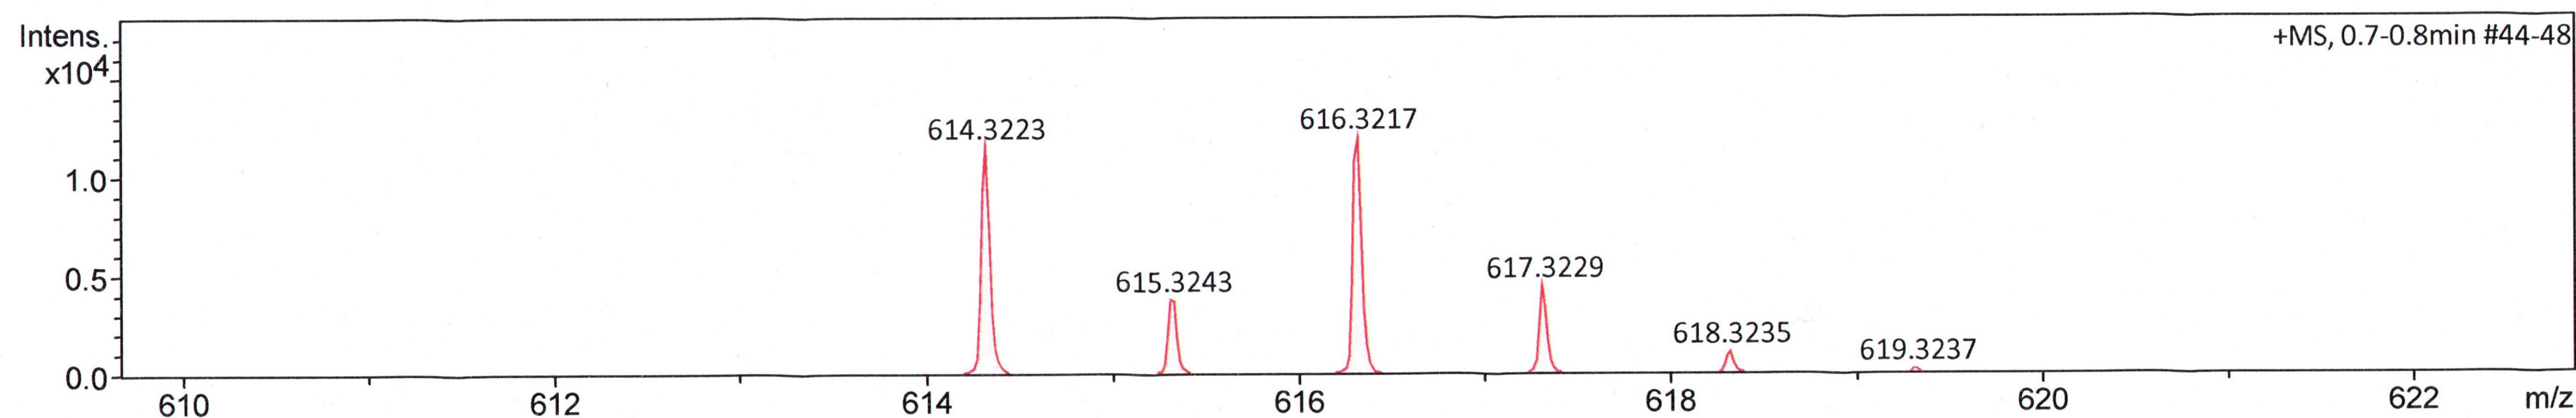

| Meas. m/z | # | Ion Formula                                            | m/z      | err [ppm] | mSigma | # mSigma | Score  | rdb | e <sup>-</sup> Conf | N-Rule |
|-----------|---|--------------------------------------------------------|----------|-----------|--------|----------|--------|-----|---------------------|--------|
| 614.3223  | 1 | C <sub>29</sub> H <sub>58</sub> BrNNaO <sub>4</sub> Si | 614.3211 | -1.9      | 22.0   | 1        | 100.00 | 1.5 | even                | ok     |



# Supplementary Figure 18

## Mass Spectrum SmartFormula Report

| Analysis Info |                                                | Acquisition Date | 1/23/2017 1:30:13 PM |               |
|---------------|------------------------------------------------|------------------|----------------------|---------------|
| Analysis Name | D:\Data\Spektren2017\2017_0169_SEI.d           | Operator         | J.Adelmann           |               |
| Method        | tune_wide.m                                    | Instrument       | micrOTOF-Q III       | 8228888.20516 |
| Sample Name   | 2017_0169_SEI                                  |                  |                      |               |
| Comment       | Fink Julian<br>JF037<br>6pmol/uL in MeCN/CHCl3 |                  |                      |               |

| Acquisition Parameter |            |                 |           |                  |           |
|-----------------------|------------|-----------------|-----------|------------------|-----------|
| Source Type           | ESI        | Ion Polarity    | Positive  | Set Nebulizer    | 0.3 Bar   |
| Focus                 | Not active | Set Funnel 1 RF | 200.0 Vpp | Set Dry Heater   | 200 °C    |
| Scan Begin            | 50 m/z     | Set Funnel 2 RF | 300.0 Vpp | Set Dry Gas      | 4.0 l/min |
| Scan End              | 4000 m/z   | Set Hexapole RF | 400.0 Vpp | Set Divert Valve | Source    |

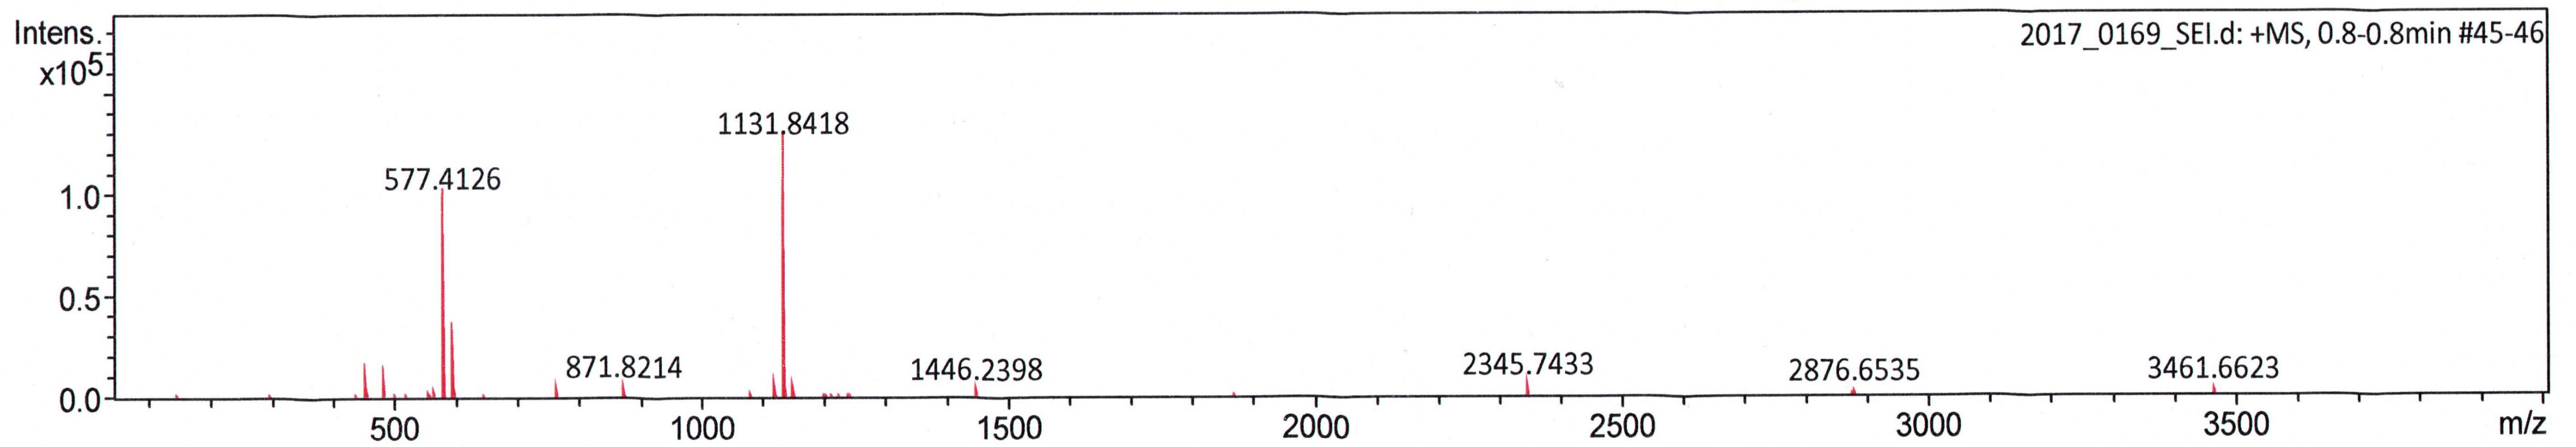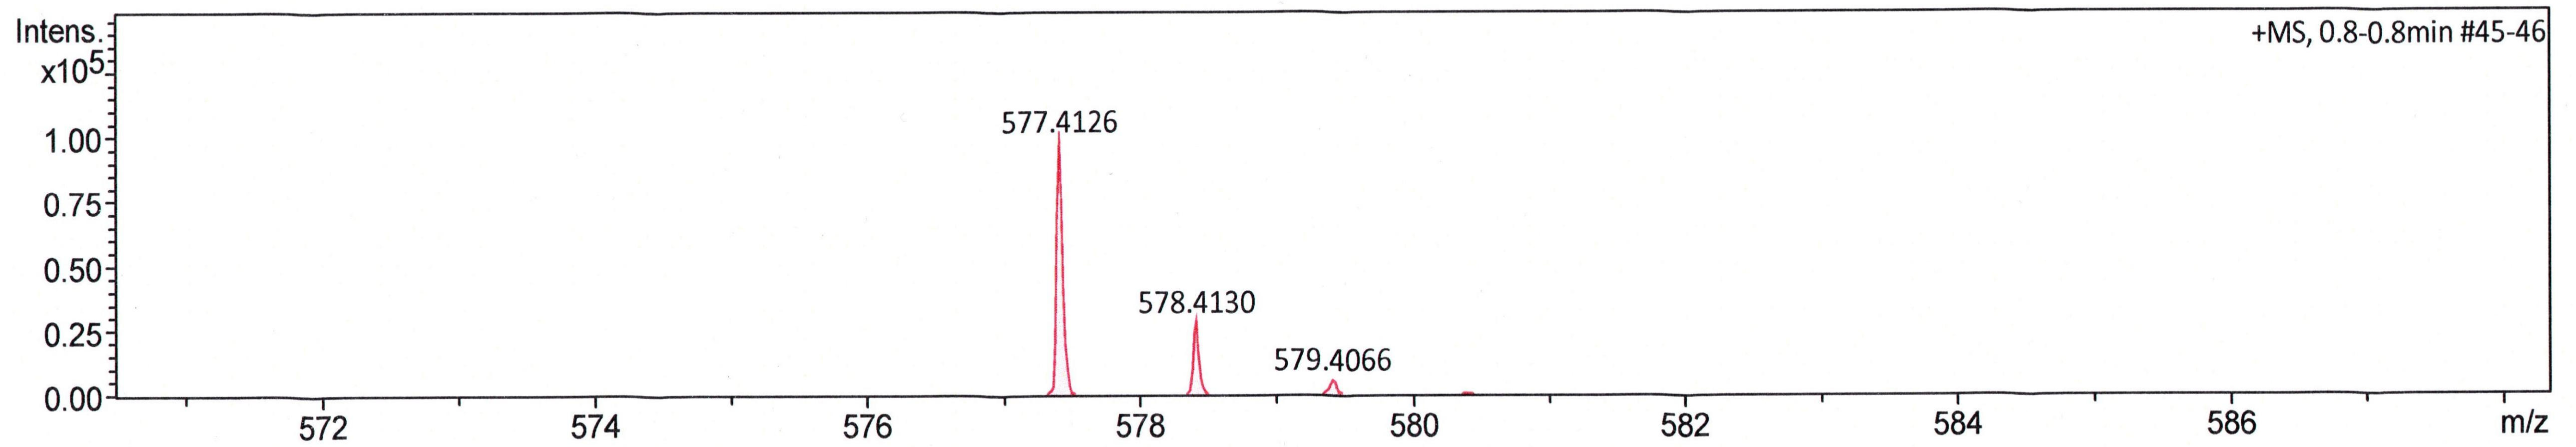

| Meas. m/z | # | Ion Formula    | m/z      | err [ppm] | mSigma | # mSigma | Score  | rdb | e <sup>-</sup> Conf | N-Rule |
|-----------|---|----------------|----------|-----------|--------|----------|--------|-----|---------------------|--------|
| 577.4126  | 1 | C29H58N4NaO4Si | 577.4120 | -1.1      | 55.6   | 1        | 100.00 | 3.5 | even                | ok     |

# Supplementary Figure 19

## Mass Spectrum SmartFormula Report

|                      |                                                 |                  |                     |               |
|----------------------|-------------------------------------------------|------------------|---------------------|---------------|
| <b>Analysis Info</b> |                                                 | Acquisition Date | 2/9/2017 2:33:17 PM |               |
| Analysis Name        | D:\Data\Spektren2017\2017_0337_SEI_90_01_1387.d | Operator         | J.Adelmann          |               |
| Method               | automation_esi_tune_pos_mid_ja.m                | Instrument       | micrOTOF-Q III      | 8228888.20516 |
| Sample Name          | 2017_0337_SEI                                   |                  |                     |               |
| Comment              | Fink Julian<br>JF047<br>4 pMol/uL in MeCN/CHCl3 |                  |                     |               |

|                              |            |                 |           |                  |           |
|------------------------------|------------|-----------------|-----------|------------------|-----------|
| <b>Acquisition Parameter</b> |            |                 |           |                  |           |
| Source Type                  | ESI        | Ion Polarity    | Positive  | Set Nebulizer    | 0.7 Bar   |
| Focus                        | Not active | Set Funnel 1 RF | 300.0 Vpp | Set Dry Heater   | 200 °C    |
| Scan Begin                   | 50 m/z     | Set Funnel 2 RF | 400.0 Vpp | Set Dry Gas      | 5.0 l/min |
| Scan End                     | 3500 m/z   | Set Hexapole RF | 500.0 Vpp | Set Divert Valve | Source    |

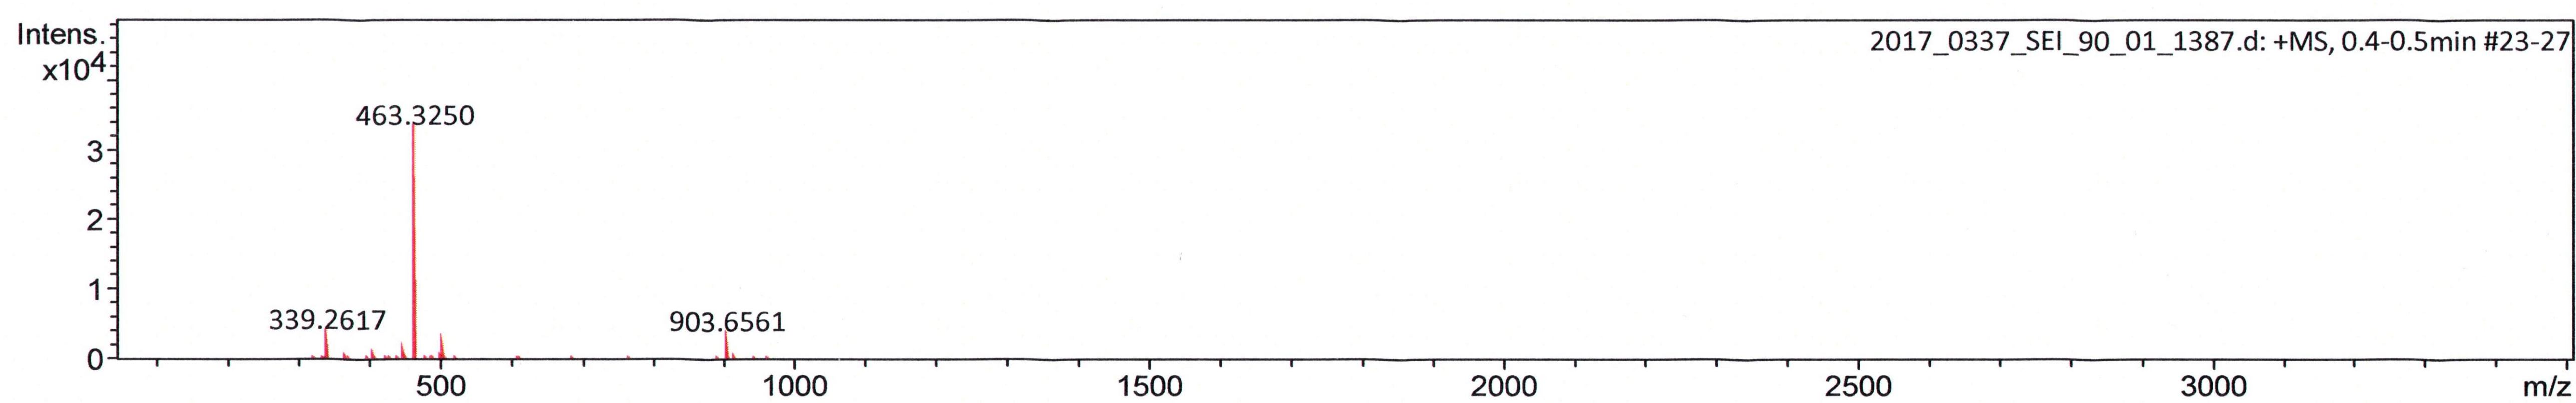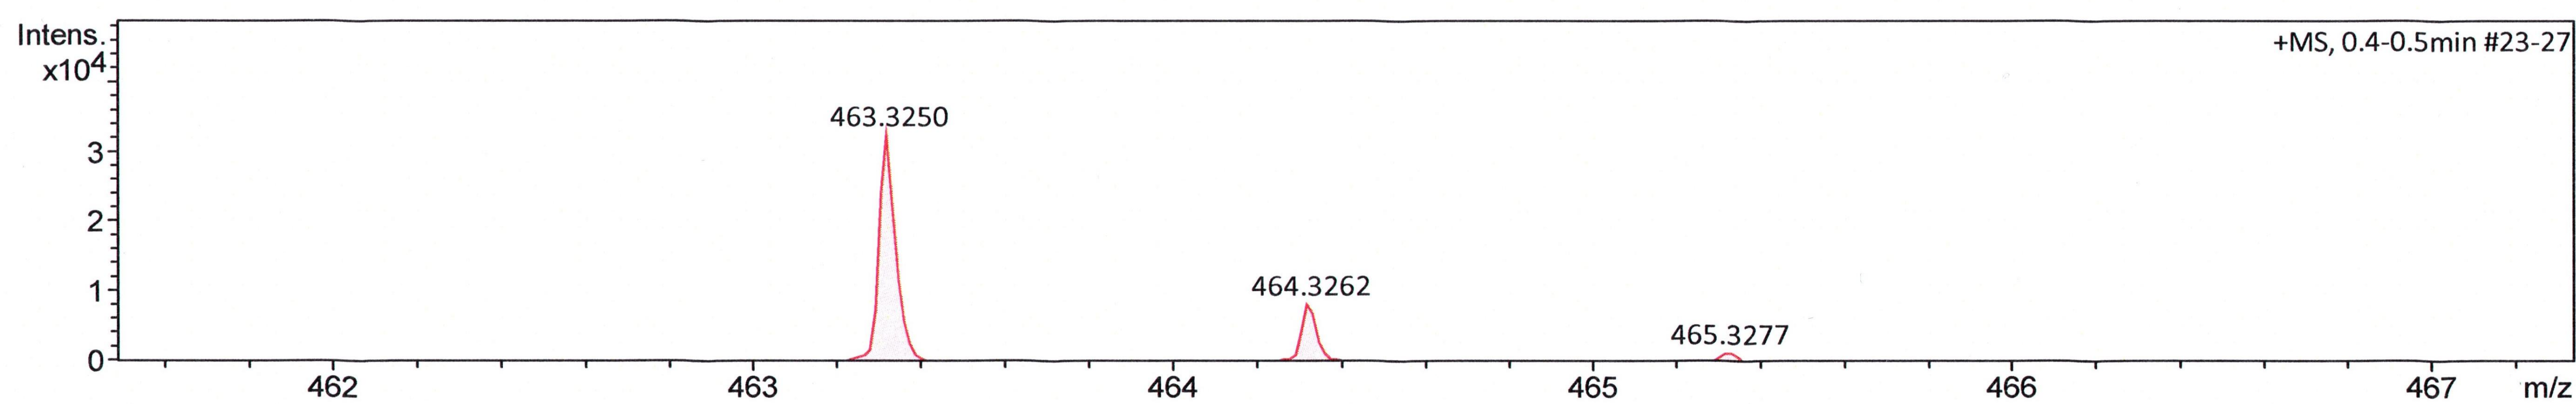

| Meas. m/z | # | Ion Formula  | m/z      | err [ppm] | mSigma | # mSigma | Score  | rdb | e <sup>-</sup> Conf | N-Rule |
|-----------|---|--------------|----------|-----------|--------|----------|--------|-----|---------------------|--------|
| 463.3250  | 1 | C23H44N4NaO4 | 463.3255 | 0.9       | 11.2   | 1        | 100.00 | 3.5 | even                | ok     |

# Supplementary Figure 20

## Mass Spectrum SmartFormula Report

|                      |                                                 |                  |                      |               |
|----------------------|-------------------------------------------------|------------------|----------------------|---------------|
| <b>Analysis Info</b> |                                                 | Acquisition Date | 2/16/2017 1:20:24 PM |               |
| Analysis Name        | D:\Data\Spektren2017\2017_0514_SEI_11_01_1441.d | Operator         | J.Adelmann           |               |
| Method               | automation_esi_tune_pos_low_ja_meoh.m           | Instrument       | micrOTOF-Q III       | 8228888.20516 |
| Sample Name          | 2017_0514_SEI                                   |                  |                      |               |
| Comment              | Fink Julian<br>JF052<br>3 pMol/uL in MeOH       |                  |                      |               |

|                              |            |                 |           |                  |           |
|------------------------------|------------|-----------------|-----------|------------------|-----------|
| <b>Acquisition Parameter</b> |            |                 |           |                  |           |
| Source Type                  | ESI        | Ion Polarity    | Positive  | Set Nebulizer    | 0.7 Bar   |
| Focus                        | Not active | Set Funnel 1 RF | 100.0 Vpp | Set Dry Heater   | 200 °C    |
| Scan Begin                   | 50 m/z     | Set Funnel 2 RF | 300.0 Vpp | Set Dry Gas      | 5.0 l/min |
| Scan End                     | 5000 m/z   | Set Hexapole RF | 200.0 Vpp | Set Divert Valve | Source    |

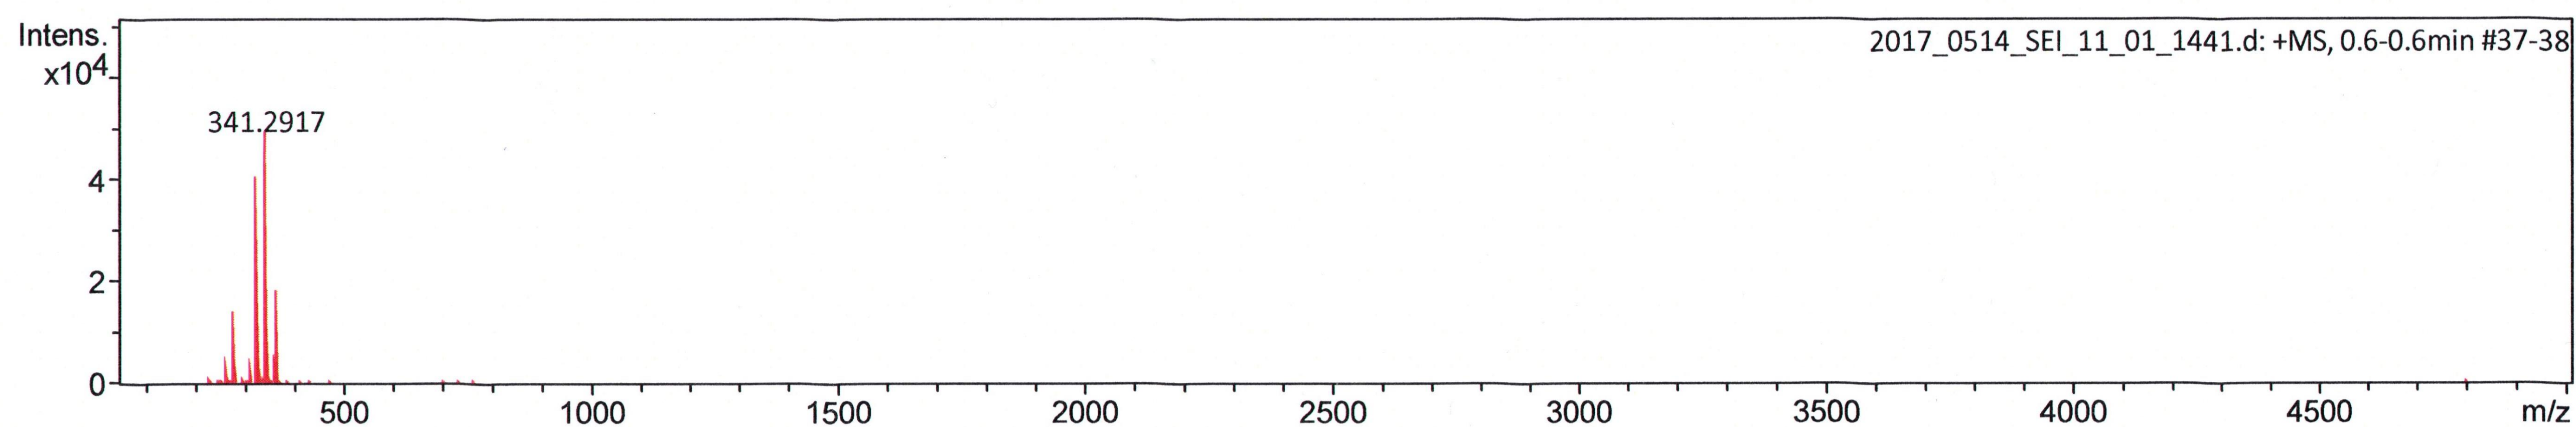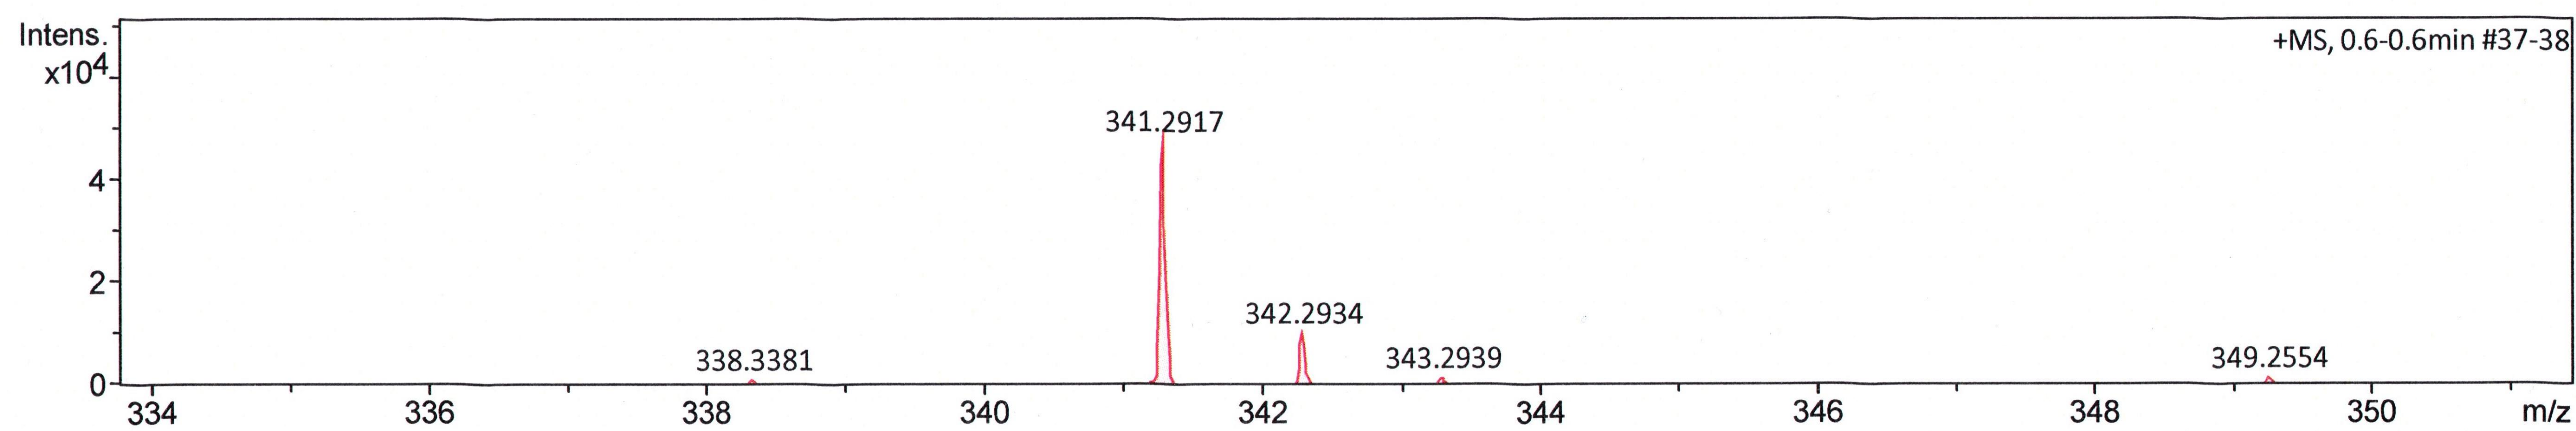

| Meas. m/z | # | Ion Formula                                                   | m/z      | err [ppm] | mSigma | # mSigma | Score  | rdb | e <sup>-</sup> Conf | N-Rule |
|-----------|---|---------------------------------------------------------------|----------|-----------|--------|----------|--------|-----|---------------------|--------|
| 341.2917  | 1 | C <sub>18</sub> H <sub>37</sub> N <sub>4</sub> O <sub>2</sub> | 341.2911 | -1.8      | 2.1    | 1        | 100.00 | 2.5 | even                | ok     |

# Supplementary Table 1

**a**

| GROUP                     | RANK (NES) | NAME                                                              | SIZE | ES         | NES       | FDR q-val   | FWER p-val | RANK AT MAX | LEADING EDGE                    |
|---------------------------|------------|-------------------------------------------------------------------|------|------------|-----------|-------------|------------|-------------|---------------------------------|
| clathrin-coated membranes | 1          | GO_AP_TYPE_MEMBRANE_COAT_ADAPTOR_COMPLEX                          | 37   | 0,6817025  | 2,139373  | 0,009       | 0          | 4769        | tags=73%, list=20%, signal=91%  |
|                           | 2          | GO_CLATHRIN_COATED_VESICLE                                        | 140  | 0,4177536  | 2,1109693 | 0,009       | 0,009      | 3360        | tags=36%, list=14%, signal=42%  |
|                           | 6          | GO_CLATHRIN_ADAPTOR_COMPLEX                                       | 27   | 0,6502399  | 2,0203426 | 0,018837286 | 0,063      | 4769        | tags=70%, list=20%, signal=87%  |
|                           | 15         | GO_CLATHRIN_COAT                                                  | 45   | 0,6242246  | 1,87694   | 0,025962245 | 0,153      | 4769        | tags=67%, list=20%, signal=83%  |
|                           | 16         | GO_TRANS_GOLGI_NETWORK_TRANSPORT_VESICLE                          | 26   | 0,50127023 | 1,8702269 | 0,025858812 | 0,17       | 3360        | tags=42%, list=14%, signal=49%  |
|                           | 19         | GO_COATED_VESICLE                                                 | 205  | 0,33293936 | 1,8079635 | 0,03574674  | 0,243      | 3360        | tags=29%, list=14%, signal=33%  |
|                           | 20         | GO_CLATHRIN_COATED_VESICLE_MEMBRANE                               | 66   | 0,42314196 | 1,8042084 | 0,03488713  | 0,243      | 3124        | tags=36%, list=13%, signal=42%  |
|                           | 34         | GO_COATED_MEMBRANE                                                | 81   | 0,5143869  | 1,724187  | 0,0398519   | 0,381      | 4845        | tags=51%, list=20%, signal=63%  |
| endocytosis               | 46         | GO_CLATHRIN_VESICLE_COAT                                          | 22   | 0,56756634 | 1,6978397 | 0,035762247 | 0,429      | 3019        | tags=55%, list=12%, signal=62%  |
|                           | 30         | GO_PHAGOCYTOCYTIC_VESICLE                                         | 73   | 0,52179927 | 1,7359599 | 0,03921569  | 0,35       | 4086        | tags=51%, list=17%, signal=61%  |
|                           | 37         | GO_PHAGOCYTOCYTIC_VESICLE_MEMBRANE                                | 46   | 0,53581667 | 1,7175857 | 0,03818942  | 0,388      | 4086        | tags=50%, list=17%, signal=60%  |
| early endosome            | 50         | GO_ENDOCYTOCYTIC_VESICLE                                          | 223  | 0,34582347 | 1,6779151 | 0,041357946 | 0,499      | 3881        | tags=33%, list=16%, signal=39%  |
|                           | 3          | GO_EARLY_ENDOSOME                                                 | 262  | 0,4225165  | 2,0901139 | 0,009000001 | 0,009      | 4259        | tags=40%, list=18%, signal=48%  |
| late endosome             | 5          | GO_EARLY_ENDOSOME_MEMBRANE                                        | 90   | 0,45907736 | 2,0442317 | 0,017993936 | 0,048      | 4368        | tags=44%, list=18%, signal=54%  |
|                           | 40         | GO_RETROMER_COMPLEX                                               | 19   | 0,70777726 | 1,7091843 | 0,037392348 | 0,419      | 4075        | tags=68%, list=17%, signal=82%  |
|                           | 4          | GO_LATE_ENDOSOME_MEMBRANE                                         | 87   | 0,49950457 | 2,0850801 | 0,009       | 0,009      | 4528        | tags=52%, list=19%, signal=63%  |
| lysosome                  | 7          | GO_LATE_ENDOSOME                                                  | 184  | 0,44429532 | 2,0017903 | 0,020909633 | 0,085      | 4704        | tags=44%, list=19%, signal=54%  |
|                           | 8          | GO_ENDOSOMAL_PART                                                 | 370  | 0,42579743 | 1,9757125 | 0,023100177 | 0,085      | 4576        | tags=44%, list=19%, signal=53%  |
|                           | 33         | GO_RECYCLING_ENDOSOME                                             | 118  | 0,40409502 | 1,7256137 | 0,0396777   | 0,381      | 4368        | tags=41%, list=18%, signal=49%  |
|                           | 9          | GO_LYTIC_VACUOLE                                                  | 463  | 0,4277387  | 1,9631885 | 0,021533486 | 0,085      | 4530        | tags=44%, list=19%, signal=53%  |
|                           | 12         | GO_LYTIC_VACUOLE_MEMBRANE                                         | 235  | 0,48414743 | 1,9161127 | 0,025993459 | 0,14       | 4362        | tags=49%, list=18%, signal=59%  |
| cell division             | 26         | GO_VACUOLAR_LUMEN                                                 | 104  | 0,3773395  | 1,7634717 | 0,0366276   | 0,319      | 3524        | tags=38%, list=15%, signal=45%  |
|                           | 27         | GO_BLOC_COMPLEX                                                   | 17   | 0,6160383  | 1,7550533 | 0,03736286  | 0,319      | 3791        | tags=59%, list=16%, signal=70%  |
|                           | 38         | GO_LYSOSOMAL_LUMEN                                                | 81   | 0,38517004 | 1,7134563 | 0,037687793 | 0,401      | 3471        | tags=41%, list=14%, signal=47%  |
|                           | 18         | GO_REPLICATION_FORK                                               | 58   | 0,5975565  | 1,8338519 | 0,031645566 | 0,223      | 6436        | tags=71%, list=26%, signal=96%  |
|                           | 39         | GO_MIDBODY                                                        | 116  | 0,35698095 | 1,7105753 | 0,03786879  | 0,419      | 5584        | tags=46%, list=23%, signal=59%  |
|                           | 41         | GO_REPLISOME                                                      | 28   | 0,6371837  | 1,7077754 | 0,036902785 | 0,419      | 6765        | tags=75%, list=28%, signal=104% |
| chromosomal region        | 42         | GO_NUCLEAR_REPLICATION_FORK                                       | 38   | 0,57244664 | 1,7048541 | 0,03673616  | 0,429      | 6436        | tags=68%, list=26%, signal=93%  |
|                           | 54         | GO_SPINDLE                                                        | 252  | 0,3613654  | 1,653535  | 0,048039164 | 0,579      | 5675        | tags=42%, list=17%, signal=54%  |
|                           | 28         | GO_CHROMOSOME_CENTROMERIC_REGION                                  | 158  | 0,44841677 | 1,7494394 | 0,03919173  | 0,35       | 5584        | tags=46%, list=23%, signal=59%  |
| microtubule               | 52         | GO_CHROMOSOMAL_REGION                                             | 295  | 0,39017215 | 1,6661352 | 0,04389605  | 0,553      | 6047        | tags=44%, list=25%, signal=58%  |
|                           | 14         | GO_CENTRIOLE                                                      | 86   | 0,45790482 | 1,8774872 | 0,027173832 | 0,153      | 4879        | tags=43%, list=20%, signal=54%  |
| proton transport complex  | 45         | GO_MICROTUBULE_ORGANIZING_CENTER_PART                             | 123  | 0,42793038 | 1,6979736 | 0,03635697  | 0,429      | 5643        | tags=46%, list=23%, signal=60%  |
|                           | 11         | GO_PROTON_TRANSPORTING_TWO_SECTOR_ATPASE_COMPLEX_CATALYTIC_DOMAIN | 16   | 0,67587835 | 1,9239477 | 0,026597569 | 0,13       | 4100        | tags=56%, list=17%, signal=68%  |
|                           | 13         | GO_PROTON_TRANSPORTING_V_TYPE_ATPASE_COMPLEX                      | 22   | 0,6414163  | 1,8885471 | 0,027705144 | 0,14       | 4100        | tags=64%, list=17%, signal=76%  |
| mitochondria              | 17         | GO_PROTON_TRANSPORTING_TWO_SECTOR_ATPASE_COMPLEX                  | 42   | 0,58050895 | 1,8385583 | 0,030986838 | 0,206      | 4100        | tags=52%, list=17%, signal=63%  |
|                           | 22         | GO_ORGANELLE_INNER_MEMBRANE                                       | 485  | 0,3901529  | 1,7873535 | 0,036679573 | 0,278      | 5738        | tags=40%, list=24%, signal=51%  |
|                           | 29         | GO_ORGANELLAR_RIBOSOME                                            | 70   | 0,48045403 | 1,7429737 | 0,038928393 | 0,35       | 5017        | tags=47%, list=21%, signal=59%  |
|                           | 31         | GO_MITOCHONDRIAL_MEMBRANE_PART                                    | 154  | 0,4452351  | 1,7304742 | 0,040072706 | 0,37       | 6149        | tags=45%, list=25%, signal=60%  |
|                           | 32         | GO_INNER_MITOCHONDRIAL_MEMBRANE_PROTEIN_COMPLEX                   | 93   | 0,4993963  | 1,7265102 | 0,040178046 | 0,37       | 5710        | tags=46%, list=24%, signal=60%  |
|                           | 35         | GO_INTRINSIC_COMPONENT_OF_ORGANELLE_MEMBRANE                      | 237  | 0,32457468 | 1,7241015 | 0,038970415 | 0,381      | 4674        | tags=33%, list=19%, signal=41%  |
|                           | 43         | GO_MITOCHONDRIAL_MATRIX                                           | 389  | 0,34331876 | 1,7011355 | 0,036091138 | 0,429      | 5166        | tags=36%, list=21%, signal=45%  |
|                           | 47         | GO_MITOCHONDRIAL_PROTEIN_COMPLEX                                  | 123  | 0,44945076 | 1,6955893 | 0,03665585  | 0,475      | 6139        | tags=46%, list=25%, signal=61%  |
|                           | 49         | GO_RESPIRATORY_CHAIN                                              | 75   | 0,49076676 | 1,6788516 | 0,0411818   | 0,499      | 5710        | tags=43%, list=24%, signal=56%  |
|                           | 51         | GO_INTRINSIC_COMPONENT_OF_MITOCHONDRIAL_MEMBRANE                  | 44   | 0,46190116 | 1,6689262 | 0,04424508  | 0,535      | 4932        | tags=43%, list=20%, signal=54%  |
| ungrouped                 | 53         | GO_INTRINSIC_COMPONENT_OF_MITOCHONDRIAL_INNER_MEMBRANE            | 17   | 0,5082864  | 1,6564015 | 0,047987744 | 0,561      | 2770        | tags=41%, list=11%, signal=46%  |
|                           | 10         | GO_AXON_CYTOPLASM                                                 | 31   | 0,50222677 | 1,9246219 | 0,028357327 | 0,13       | 3791        | tags=42%, list=16%, signal=50%  |
|                           | 21         | GO_IMMUNOLOGICAL_SYNAPSE                                          | 32   | 0,54109186 | 1,7903459 | 0,037997648 | 0,278      | 4488        | tags=47%, list=18%, signal=57%  |
|                           | 23         | GO_TRANS_GOLGI_NETWORK_MEMBRANE                                   | 64   | 0,49522012 | 1,7766278 | 0,037670236 | 0,305      | 3780        | tags=44%, list=16%, signal=52%  |
|                           | 24         | GO_MICROBODY                                                      | 129  | 0,3392097  | 1,7741073 | 0,036906812 | 0,305      | 5560        | tags=37%, list=23%, signal=48%  |
|                           | 25         | GO_PIGMENT_GRANULE                                                | 99   | 0,41682222 | 1,7652943 | 0,0377327   | 0,319      | 3780        | tags=34%, list=16%, signal=41%  |
|                           | 36         | GO_AUTOPHAGOSOME                                                  | 68   | 0,3550243  | 1,7179679 | 0,039000235 | 0,388      | 4494        | tags=43%, list=19%, signal=52%  |
|                           | 44         | GO_EXTRINSIC_COMPONENT_OF_ORGANELLE_MEMBRANE                      | 22   | 0,46452084 | 1,6993158 | 0,035895374 | 0,429      | 5634        | tags=50%, list=23%, signal=65%  |
|                           | 48         | GO_PML_BODY                                                       | 87   | 0,46760246 | 1,6898024 | 0,03775308  | 0,483      | 5943        | tags=45%, list=24%, signal=59%  |
|                           | 55         | GO_EXTRINSIC_COMPONENT_OF_CYTOPLASMIC_SIDE_OF_PLASMA_MEMBRANE     | 95   | 0,33212984 | 1,6519495 | 0,04801346  | 0,579      | 2920        | tags=26%, list=12%, signal=30%  |

**b**

| Group                   | RANK (NES) | NAME                                  | SIZE | ES          | NES        | FDR q-val   | FWER p-val | RANK AT MAX | LEADING EDGE                   |
|-------------------------|------------|---------------------------------------|------|-------------|------------|-------------|------------|-------------|--------------------------------|
| extracellular matrix    | 1          | GO_EXTRACELLULAR_MATRIX               | 403  | -0,6421122  | -2,1020749 | 0,046640944 | 0,029      | 3660        | tags=48%, list=15%, signal=55% |
|                         | 2          | GO_PROTEINACEOUS_EXTRACELLULAR_MATRIX | 336  | -0,65685314 | -2,0959249 | 0,027820474 | 0,038      | 3660        | tags=48%, list=15%, signal=55% |
| ER/Golgi                | 3          | GO_ENDOPLASMIC_RETICULUM_LUMEN        | 184  | -0,5300437  | -1,9498274 | 0,04489303  | 0,11       | 3157        | tags=38%, list=13%, signal=43% |
|                         | 5          | GO_GOLGI_LUMEN                        | 82   | -0,5789842  | -1,8918775 | 0,046840988 | 0,181      | 3386        | tags=35%, list=14%, signal=41% |
| anchoring junctions     | 6          | GO_CELL_SUBSTRATE_JUNCTION            | 387  | -0,38705605 | -1,8837918 | 0,045543816 | 0,199      | 3782        | tags=36%, list=16%, signal=42% |
|                         | 9          | GO_ANCHORING_JUNCTION                 | 469  | -0,39091176 | -1,8360764 | 0,047074653 | 0,275      | 4155        | tags=37%, list=17%, signal=44% |
| projection membranes    | 7          | GO_LAMELLIPODIUM_MEMBRANE             | 18   | -0,76415986 | -1,88053   | 0,042221658 | 0,199      | 3290        | tags=72%, list=14%, signal=83% |
|                         | 10         | GO_NEURON_PROJECTION_MEMBRANE         | 32   | -0,61009735 | -1,8091    | 0,04889716  | 0,285      | 3837        | tags=50%, list=16%, signal=59% |
|                         | 14         | GO_DENDRITE_MEMBRANE                  | 18   | -0,57180417 | -1,7932113 | 0,04320775  | 0,303      | 2095        | tags=39%, list=9%, signal=43%  |
| platelet alpha granules | 4          | GO_VESICLE_LUMEN                      | 96   | -0,5390744  | -1,9249805 | 0,04230829  | 0,11       | 3943        | tags=40%, list=16%, signal=47% |
|                         | 12         | GO_PLATELET_ALPHA_GRANULE_LUMEN       | 53   | -0,5812689  | -1,8022362 | 0,047483716 | 0,303      | 3943        | tags=42%, list=16%, signal=49% |
| gap junction, connexion | 13         | GO_PLATELET_ALPHA_GRANULE             | 72   | -0,4918661  | -1,7938668 | 0,045219976 | 0,303      | 3943        | tags=39%, list=16%, signal=46% |
|                         | 8          | GO_GAP_JUNCTION                       | 28   | -0,61969125 | -1,8709532 | 0,041193422 | 0,222      | 3631        | tags=39%, list=15%, signal=46% |
|                         | 11         | GO_CONNEXON_COMPLEX                   | 18   | -0,6039202  | -1,8056597 | 0,046751294 | 0,285      | 3631        | tags=39%, list=15%, signal=46% |

## Supplementary Table 1: Gene set enrichment analysis (GSEA)

**a:** GSEA report of the most enriched Gene Ontology CC gene sets (FDR < 0.05) in macrophages, ranked by their normalized enrichment score and grouped by function/compartiment. **b:** GSEA report of the most enriched Gene Ontology CC gene sets (FDR < 0.05) in fibroblasts, ranked by their normalized enrichment score and grouped by function/compartiment.

# Supplementary Table 2

| Gene   | Name                                                  |
|--------|-------------------------------------------------------|
| Acaa1a | 3-ketoacyl-CoA thiolase A, peroxisomal                |
| Acaa1b | 3-ketoacyl-CoA thiolase B, peroxisomal                |
| Acaa2  | 3-ketoacyl-CoA thiolase, mitochondrial                |
| Asah1  | Acid ceramidase                                       |
| Asah2  | Neutral ceramidase                                    |
| Chpt1  | Choline Phosphotransferase 1                          |
| Degs1  | Delta 4-Desaturase, Sphingolipid 1                    |
| Degs2  | Delta 4-Desaturase, Sphingolipid 2                    |
| Far1   | Fatty Acyl-CoA Reductase 1                            |
| Far2   | Fatty Acyl-CoA Reductase 2                            |
| Fdft1  | Farnesyl-diphosphate farnesyltransferase 1            |
| Fdps   | farnesyl diphosphate synthase                         |
| Ggps1  | Geranylgeranyl Diphosphate Synthase 1                 |
| Gk2    | Glycerol Kinase 2                                     |
| Gk5    | Glycerol Kinase 5                                     |
| Gnpat  | Glyceronephosphate O-Acyltransferase                  |
| Gpd1   | Glycerol-3-Phosphate Dehydrogenase 1                  |
| Gpd1l  | Glycerol-3-Phosphate Dehydrogenase 1 Like             |
| Gpd2   | Glycerol-3-Phosphate Dehydrogenase 2                  |
| Hmgcr  | 3-Hydroxy-3-Methylglutaryl-CoA Reductase              |
| Hmgcs1 | 3-Hydroxy-3-Methylglutaryl-CoA Synthase 1             |
| Hmgcs2 | 3-Hydroxy-3-Methylglutaryl-CoA Synthase 2             |
| Idi1   | Isopentenyl-Diphosphate Delta Isomerase 1             |
| Idi2   | Isopentenyl-Diphosphate Delta Isomerase 2             |
| Kdsr   | 3-Ketodihydrosphingosine Reductase                    |
| Lass2  | Ceramide Synthase 2                                   |
| Lass3  | Ceramide Synthase 3                                   |
| Lass4  | Ceramide Synthase 4                                   |
| Lass5  | Ceramide Synthase 5                                   |
| Lass6  | Ceramide Synthase 6                                   |
| Mvk    | Mevalonate Kinase                                     |
| Pcyt1a | Phosphate Cytidylyltransferase 1, Choline, Alpha      |
| Pcyt1b | Phosphate Cytidylyltransferase 1, Choline, Beta       |
| Pcyt2  | Ethanolamine-phosphate cytidylyltransferase           |
| Pemt   | Phosphatidylethanolamine N-Methyltransferase          |
| Pisd   | Phosphatidylserine Decarboxylase                      |
| Plcb1  | Phospholipase C Beta 1                                |
| Plcb2  | Phospholipase C Beta 2                                |
| Plcb3  | Phospholipase C Beta 3                                |
| Plcb4  | Phospholipase C Beta 4                                |
| Plcg1  | Phospholipase C Gamma 1                               |
| Plcg2  | Phospholipase C Gamma 2                               |
| Plcl1  | Phospholipase C Like 1 (Inactive)                     |
| Plcl2  | Phospholipase C Like 2                                |
| Pmvk   | Phosphomevalonate Kinase                              |
| Ptdss1 | Phosphatidylserine Synthase 1                         |
| Ptdss2 | Phosphatidylserine Synthase 2                         |
| Sgms1  | Sphingomyelin Synthase 1                              |
| Sgms2  | Sphingomyelin Synthase 2                              |
| Sgpl1  | Sphingosine-1-Phosphate Lyase 1                       |
| Sgpp1  | Sphingosine-1-Phosphate Phosphatase 1                 |
| Sgpp2  | Sphingosine-1-Phosphate Phosphatase 2                 |
| Smpd1  | Sphingomyelin Phosphodiesterase 1                     |
| Smpd2  | Sphingomyelin Phosphodiesterase 2                     |
| Smpd3  | Sphingomyelin Phosphodiesterase 3                     |
| Smpd4  | Sphingomyelin Phosphodiesterase 4                     |
| Sphk1  | Sphingosine Kinase 1                                  |
| Sphk2  | Sphingosine Kinase 2                                  |
| Sptlc1 | Serine Palmitoyltransferase Long Chain Base Subunit 1 |
| Sptlc2 | Serine Palmitoyltransferase Long Chain Base Subunit 2 |
| Sptlc3 | Serine Palmitoyltransferase Long Chain Base Subunit 3 |
| Sqle   | Squalene Epoxidase                                    |
| Tpi1   | Triosephosphate Isomerase 1                           |

## Supplementary Table 2: Membrane-modulating proteins in macrophages vs fibroblasts

Membrane-modulating proteins from the families of sphingolipids (including gangliosides), cholesterol and phosphatidylcholine which were considered for simplified comparison of macrophages and fibroblasts.
